# Supplementary material for: Hepatitis E Seroprevalence and Detection of Genotype 3 Strains in Domestic Pigs from Sierra Leone Collected in 2016 and 2017
Source: MDPI journal article supplement (doi:10.3390/v16040558), 2024-04-03

|             | Designation FLU | Serum/Pool No | Findings (PCR) | OD405 | Finding | Region | District | Chiefdom | Sampling Unit/Town/Village    | Herd/Flock/Farm | Animal Species | Breed             | Date of sample collection | Habitat    | Housing/Station/Pasture /stable | History of migration | Gender/M/F          | Age in month |
|-------------|-----------------|---------------|----------------|-------|---------|--------|----------|----------|-------------------------------|-----------------|----------------|-------------------|---------------------------|------------|---------------------------------|----------------------|---------------------|--------------|
| NADIA       | SLE/ 1/16 SW    | Pool 1        | neg            | 0.11  | neg     | South  | Moyamba  | Kori     | University Farm, Njala Campus | Flock           | Swine          | Large White       | 13.12.2016                | Grassland  | Stationary                      | Bo/Guinea/Moyamba    | F                   | 7            |
|             | SLE/ 2/16 SW    |               |                | 0.15  | neg     | South  | Moyamba  | Kori     | University Farm, Njala Campus | Flock           | Swine          | Swine             | Large White               | 13.12.2016 | Grassland                       | Stationary           | Bo/Guinea/Moyamba   | F            |
|             | SLE/ 3/16 SW    |               |                | 0.11  | neg     | South  | Moyamba  | Kori     | University Farm, Njala Campus | Flock           | Swine          | Large White       | 13.12.2016                | Grassland  | Stationary                      | Bo/Guinea/Moyamba    | F                   | 7            |
| SIP/MOY/004 | SLE/ 4/16 SW    |               |                | 0.17  | neg     | South  | Moyamba  | Kori     | University Farm, Njala Campus | Flock           | Swine          | Large White       | 13.12.2016                | Grassland  | Stationary                      | Bo/Guinea/Moyamba    | M                   | 12           |
| SIP/MOY/005 | SLE/ 5/16 SW    |               |                | 0.15  | neg     | South  | Moyamba  | Kori     | University Farm, Njala Campus | Flock           | Swine          | Large White       | 13.12.2016                | Grassland  | Stationary                      | Bo/Guinea/Moyamba    | M                   | 12           |
| SIP/MOY/006 | SLE/ 6/16 SW    |               |                | 0.18  | neg     | South  | Moyamba  | Kori     | University Farm, Njala Campus | Flock           | Swine          | Large White       | 13.12.2016                | Grassland  | Stationary                      | Bo/Guinea/Moyamba    | F                   | 12           |
| SIP/MOY/007 | SLE/ 7/16 SW    | Pool 2        | neg            | 0.11  | neg     | South  | Moyamba  | Kori     | University Farm, Njala Campus | Flock           | Swine          | Large White       | 13.12.2016                | Grassland  | Stationary                      | Bo/Guinea/Moyamba    | F                   | 12           |
| SIP/MOY/008 | SLE/ 8/16 SW    |               |                | 0.13  | neg     | South  | Moyamba  | Kori     | University Farm, Njala Campus | Flock           | Swine          | Large White       | 13.12.2016                | Grassland  | Stationary                      | Bo/Guinea/Moyamba    | F                   | 6            |
| SIP/MOY/009 | SLE/ 9/16 SW    |               |                | 0.18  | neg     | South  | Moyamba  | Kori     | University Farm, Njala Campus | Flock           | Swine          | Large White       | 13.12.2016                | Grassland  | Stationary                      | Bo/Guinea/Moyamba    | F                   | 6            |
| SIP/MOY/010 | SLE/ 10/16 SW   |               |                | 0.13  | neg     | South  | Moyamba  | Kori     | University Farm, Njala Campus | Flock           | Swine          | Large White       | 13.12.2016                | Grassland  | Stationary                      | Bo/Guinea/Moyamba    | F                   | 6            |
| SIP/MOY/011 | SLE/ 11/16 SW   | Pool 3        | neg            | 0.20  | neg     | South  | Moyamba  | Kori     | University Farm, Njala Campus | Flock           | Swine          | Large White       | 13.12.2016                | Grassland  | Stationary                      | Bo/Guinea/Moyamba    | F                   | 9            |
| SIP/MOY/012 | SLE/ 12/16 SW   |               |                | 0.12  | neg     | South  | Moyamba  | Kori     | University Farm, Njala Campus | Flock           | Swine          | Swine             | Large White               | 13.12.2016 | Grassland                       | Stationary           | Bo/Guinea/Moyamba   | M            |
| SIP/MOY/013 | SLE/ 13/16 SW   |               |                | 0.11  | neg     | South  | Moyamba  | Kori     | University Farm, Njala Campus | Flock           | Swine          | Large White       | 13.12.2016                | Grassland  | Stationary                      | Bo/Guinea/Moyamba    | F                   | 9            |
| SIP/MOY/014 | SLE/ 14/16 SW   |               |                | 0.15  | neg     | South  | Moyamba  | Dasse    | Domboma                       | Flock           | Swine          | West Africa Dwarf | 13.12.2016                | Farm Bush  | Stationary                      | Mano                 | M                   | 24           |
| SIP/MOY/015 | SLE/ 15/16 SW   |               |                | 0.20  | neg     | South  | Moyamba  | Dasse    | Domboma                       | Flock           | Swine          | West Africa Dwarf | 13.12.2016                | Farm Bush  | Stationary                      | Mano                 | M                   | 7            |
| SIP/MOY/016 | SLE/ 16/16 SW   |               |                | 0.17  | neg     | South  | Moyamba  | Dasse    | Domboma                       | Flock           | Swine          | West Africa Dwarf | 13.12.2016                | Farm Bush  | Stationary                      | Mano                 | F                   | 18           |
| SIP/MOY/017 | SLE/ 17/16 SW   | Pool 4        | neg            | 0.17  | neg     | South  | Moyamba  | Dasse    | Domboma                       | Flock           | Swine          | West Africa Dwarf | 13.12.2016                | Farm Bush  | Stationary                      | Mano                 | F                   | 12           |
| SIP/MOY/018 | SLE/ 18/16 SW   |               |                | 0.16  | neg     | South  | Moyamba  | Dasse    | Domboma                       | Flock           | Swine          | Swine             | West Africa Dwarf         | 13.12.2016 | Farm Bush                       | Stationary           | Mano                | F            |
| SIP/MOY/019 | SLE/ 19/16 SW   |               |                | 0.11  | neg     | South  | Moyamba  | Dasse    | Domboma                       | Flock           | Swine          | West Africa Dwarf | 13.12.2016                | Farm Bush  | Stationary                      | Mano                 | F                   | 12           |
| SIP/MOY/020 | SLE/ 20/16 SW   |               |                | 0.15  | neg     | South  | Moyamba  | Dasse    | Domboma                       | Flock           | Swine          | West Africa Dwarf | 13.12.2016                | Farm Bush  | Stationary                      | Mano                 | F                   | 9            |
| SIP/MOY/021 | SLE/ 21/16 SW   |               |                | 0.12  | neg     | South  | Moyamba  | Kaiyehun | Farm                          | Swine           | Swine          | West Africa Dwarf | 15.12.2016                | Farm Bush  | Stationary                      | Njama                | F                   | 24           |
| SIP/MOY/022 | SLE/ 22/16 SW   | Pool 5        | neg            | 0.22  | neg     | South  | Moyamba  | Kowa     | Kaiyehun                      | Farm            | Swine          | West Africa Dwarf | 15.12.2016                | Farm Bush  | Stationary                      | Njama                | F                   | 24           |
| SIP/MOY/023 | SLE/ 23/16 SW   |               |                | 0.20  | neg     | South  | Moyamba  | Kowa     | Kaiyehun                      | Farm            | Swine          | Swine             | West Africa Dwarf         | 15.12.2016 | Farm Bush                       | Stationary           | Njama               | M            |
| SIP/MOY/024 | SLE/ 24/16 SW   |               |                | 0.17  | neg     | South  | Moyamba  | Kowa     | Kaiyehun                      | Farm            | Swine          | West Africa Dwarf | 15.12.2016                | Farm Bush  | Stationary                      | Njama                | M                   | 18           |
| SIP/MOY/025 | SLE/ 25/16 SW   |               |                | 0.17  | neg     | South  | Moyamba  | Kowa     | Kaiyehun                      | Farm            | Swine          | West Africa Dwarf | 15.12.2016                | Farm Bush  | Stationary                      | Njama                | M                   | 18           |
| SIP/MOY/026 | SLE/ 26/16 SW   |               |                | 0.16  | neg     | South  | Moyamba  | Kowa     | Kaiyehun                      | Farm            | Swine          | West Africa Dwarf | 15.12.2016                | Farm Bush  | Stationary                      | Njama                | F                   | 19           |
| SIP/MOY/027 | SLE/ 27/16 SW   | Pool 6        | neg            | 0.11  | neg     | South  | Moyamba  | Kowa     | Kaiyehun                      | Flock           | Swine          | West Africa Dwarf | 15.12.2016                | Farm Bush  | Stationary                      | Njama                | M                   | 24           |
| SIP/MOY/028 | SLE/ 28/16 SW   |               |                | 0.15  | neg     | South  | Moyamba  | Kowa     | Kaiyehun                      | Flock           | Swine          | Swine             | West Africa Dwarf         | 15.12.2016 | Farm Bush                       | Stationary           | Njama               | F            |
| SIP/MOY/029 | SLE/ 29/16 SW   |               |                | 0.13  | neg     | South  | Moyamba  | Kaiyehun | Flock                         | Swine           | Swine          | West Africa Dwarf | 15.12.2016                | Farm Bush  | Stationary                      | Njama                | F                   | 12           |
| SIP/MOY/030 | SLE/ 30/16 SW   |               |                | 0.22  | neg     | South  | Moyamba  | Kowa     | Kaiyehun                      | Flock           | Swine          | West Africa Dwarf | 15.12.2016                | Farm Bush  | Stationary                      | Njama                | F                   | 12           |
| SIP/MOY/031 | SLE/ 31/16 SW   | Pool 7        | neg            | 0.17  | neg     | South  | Moyamba  | Kowa     | Kaiyehun                      | Flock           | Swine          | West Africa Dwarf | 15.12.2016                | Farm Bush  | Stationary                      | Njama                | F                   | 24           |
| SIP/MOY/032 | SLE/ 32/16 SW   |               |                | 0.14  | neg     | South  | Moyamba  | Kowa     | Kaiyehun                      | Flock           | Swine          | Swine             | West Africa Dwarf         | 15.12.2016 | Farm Bush                       | Stationary           | Njama               | M            |
| SIP/MOY/033 | SLE/ 33/16 SW   |               |                | 0.14  | neg     | South  | Moyamba  | Kowa     | Kaiyehun                      | Flock           | Swine          | West Africa Dwarf | 15.12.2016                | Farm Bush  | Stationary                      | Njama                | M                   | 36           |
| SIP/MOY/034 | SLE/ 34/16 SW   |               |                | 0.12  | neg     | South  | Moyamba  | Kowa     | Shenge                        | Flock           | Swine          | West Africa Dwarf | 15.12.2016                | Farm Bush  | Stationary                      | Njama                | M                   | 36           |
| SIP/MOY/035 | SLE/ 35/16 SW   |               |                | 0.13  | neg     | South  | Moyamba  | Kowa     | Shenge                        | Flock           | Swine          | West Africa Dwarf | 15.12.2016                | Farm Bush  | Stationary                      | Njama                | F                   | 12           |
| SIP/MOY/036 | SLE/ 36/16 SW   |               |                | 0.14  | neg     | South  | Moyamba  | Kowa     | Shenge                        | Flock           | Swine          | West Africa Dwarf | 15.12.2016                | Farm Bush  | Stationary                      | Njama                | F                   | 18           |
| SIP/MOY/037 | SLE/ 37/16 SW   | Pool 8        | neg            | 0.15  | neg     | South  | Moyamba  | Kowa     | Shenge                        | Flock           | Swine          | West Africa Dwarf | 15.12.2016                | Farm Bush  | Stationary                      | Njama                | F                   | 17           |
| SIP/MOY/038 | SLE/ 38/16 SW   |               |                | 0.16  | neg     | South  | Moyamba  | Kowa     | Shenge                        | Flock           | Swine          | Swine             | West Africa Dwarf         | 15.12.2016 | Farm Bush                       | Stationary           | Njama               | M            |
| SIP/MOY/039 | SLE/ 39/16 SW   |               |                | 0.10  | neg     | South  | Moyamba  | Kowa     | Shenge                        | Flock           | Swine          | West Africa Dwarf | 15.12.2016                | Farm Bush  | Stationary                      | Njama                | F                   | 12           |
| SIP/MOY/040 | SLE/ 40/16 SW   |               |                | 0.16  | neg     | South  | Moyamba  | Kowa     | Shenge                        | Flock           | Swine          | West Africa Dwarf | 15.12.2016                | Farm Bush  | Stationary                      | Njama                | M                   | 18           |
| SIP/MOY/041 | SLE/ 41/16 SW   |               |                | 0.14  | neg     | South  | Moyamba  | Kowa     | Shenge                        | Flock           | Swine          | West Africa Dwarf | 15.12.2016                | Farm Bush  | Stationary                      | Njama                | M                   | 18           |
| SIP/MOY/042 | SLE/ 42/16 SW   | Pool 9        | neg            | 0.16  | neg     | South  | Moyamba  | Kowa     | Shenge                        | Flock           | Swine          | West Africa Dwarf | 15.12.2016                | Farm Bush  | Stationary                      | Njama                | F                   | 18           |
| SIP/MOY/043 | SLE/ 43/16 SW   |               |                | 0.09  | neg     | South  | Moyamba  | Kowa     | Bateima                       | Flock           | Swine          | Swine             | West Africa Dwarf         | 15.12.2016 | Farm Bush                       | Stationary           | Bo/Moyamba District | F            |
| SIP/MOY/044 | SLE/ 44/16 SW   |               |                | 0.11  | neg     | South  | Moyamba  | Kowa     | Bateima                       | Flock           | Swine          | West Africa Dwarf | 15.12.2016                | Farm Bush  | Stationary                      | Bo/Moyamba District  | F                   | 14           |
| SIP/MOY/045 | SLE/ 45/16 SW   |               |                | 0.15  | neg     | South  | Moyamba  | Kowa     | Bateima                       | Flock           | Swine          | West Africa Dwarf | 15.12.2016                | Farm Bush  | Stationary                      | Bo/Moyamba District  | M                   | 18           |
| SIP/MOY/046 | SLE/ 46/16 SW   |               |                | 0.13  | neg     | South  | Moyamba  | Kowa     | Bateima                       | Flock           | Swine          | West Africa Dwarf | 15.12.2016                | Farm Bush  | Stationary                      | Bo/Moyamba District  | M                   | 18           |
| SIP/MOY/047 | SLE/ 47/16 SW   | Pool 10       | neg            | 0.15  | neg     | South  | Moyamba  | Kowa     | Bateima                       | Flock           | Swine          | West Africa Dwarf | 15.12.2016                | Farm Bush  | Stationary                      | Bo/Moyamba District  | F                   | 18           |
| SIP/MOY/048 | SLE/ 48/16 SW   |               |                | 0.10  | neg     | South  | Moyamba  | Kowa     | Bateima                       | Flock           | Swine          | Swine             | West Africa Dwarf         | 15.12.2016 | Farm Bush                       | Stationary           | Bo/Moyamba District | F            |
| SIP/MOY/049 | SLE/ 49/16 SW   |               |                | 0.13  | neg     | South  | Moyamba  | Kowa     | Bateima                       | Flock           | Swine          | West Africa Dwarf | 15.12.2016                | Farm Bush  | Stationary                      | Bo/Moyamba District  | F                   | 24           |
| SIP/MOY/050 | SLE/ 50/16 SW   |               |                | 0.09  | neg     | South  | Moyamba  | Kowa     | Wonde                         | Flock           | Swine          | Duroc             | 15.12.2016                | Farm Bush  | Stationary                      | Bateima/Njama        | F                   | 36           |
| SIP/MOY/051 | SLE/ 51/16 SW   |               |                | 0.08  | neg     | South  | Moyamba  | Kowa     | Wonde                         | Flock           | Swine          | Duroc             | 15.12.2016                | Farm Bush  | Stationary                      | Bateima/Njama        | F                   | 18           |
| SIP/MOY/052 | SLE/ 52/16 SW   | Pool 11       | neg            | 0.09  | neg     | South  | Moyamba  | Kowa     | Wonde                         | Flock           | Swine          | Large White       | 15.12.2016                | Farm Bush  | Stationary                      | Bateima/Njama        | F                   | 24           |
| SIP/MOY/053 | SLE/ 53/16 SW   |               |                | 0.20  | neg     | South  | Moyamba  | Kowa     | Wonde                         | Flock           | Swine          | Swine             | Large White               | 15.12.2016 | Farm Bush                       | Stationary           | Bateima/Njama       | F            |
| SIP/MOY/054 | SLE/ 54/16 SW   |               |                | 0.12  | neg     | South  | Moyamba  | Kowa     | Wonde                         | Flock           | Swine          | Large White       | 15.12.2016                | Farm Bush  | Stationary                      | Bateima/Njama        | F                   | 24           |
| SIP/MOY/055 | SLE/ 55/16 SW   |               |                | 0.16  | neg     | South  | Moyamba  | Kowa     | Wonde                         | Flock           | Swine          | Large White       | 15.12.2016                | Farm Bush  | Stationary                      | Bateima/Njama        | F                   | 18           |
| SIP/MOY/056 | SLE/ 56/16 SW   |               |                | 0.11  | neg     | South  | Moyamba  | Kowa     | Wonde                         | Flock           | Swine          | West Africa Dwarf | 15.12.2016                | Farm Bush  | Stationary                      | Bateima/Njama        | M                   | 18           |
| SIP/MOY/057 | SLE/ 57/16 SW   | Pool 12       | neg            | 0.10  | neg     | South  | Moyamba  | Kowa     | Wonde                         | Flock           | Swine          | West Africa Dwarf | 15.12.2016                | Farm Bush  | Stationary                      | Bateima/Njama        | F                   | 24           |
| SIP/MOY/058 | SLE/ 58/16 SW   |               |                | 0.12  | neg     | South  | Moyamba  | Kowa     | Wonde                         | Flock           | Swine          | Swine             | West Africa Dwarf         | 15.12.2016 | Farm Bush                       | Stationary           | Bateima/Njama       | F            |
| SIP/MOY/059 | SLE/ 59/16 SW   |               |                | 0.09  | neg     | South  | Moyamba  | Kowa     | Wonde                         | Flock           | Swine          | West Africa Dwarf | 15.12.2016                | Farm Bush  | Stationary                      | Bateima/Njama        | F                   | 12           |
| SIP/MOY/060 | SLE/ 60/16 SW   |               |                | 0.15  | neg     | South  | Moyamba  | Kowa     | Wonde                         | Flock           | Swine          | West Africa Dwarf | 15.12.2016                | Farm Bush  | Stationary                      | Bateima/Njama        | F                   | 12           |
| SIP/MOY/061 | SLE/ 61/16 SW   |               |                | 0.11  | neg     | South  | Moyamba  | Kowa     | Wonde                         | Flock           | Swine          | West Africa Dwarf | 15.12.2016                | Farm Bush  | Stationary                      | Bateima/Njama        | M                   | 12           |
| SIP/MOY/062 | SLE/ 62/16 SW   | Pool 13       | neg            | 0.17  | neg     | South  | Moyamba  | Kowa     | Wonde                         | Flock           | Swine          | West Africa Dwarf | 15.12.2016                | Farm Bush  | Stationary                      | Bateima/Njama        | F                   | 24           |
| SIP/MOY/063 | SLE/ 63/16 SW   |               |                | 0.14  | neg     | South  | Moyamba  | Kowa     | Wonde                         | Flock           | Swine          | Swine             | West Africa Dwarf         | 15.12.2016 | Farm Bush                       | Stationary           | Bateima/Njama       | F            |
| SIP/MOY/064 | SLE/ 64/16 SW   |               |                | 0.14  | neg     | South  | Moyamba  | Kowa     | Wonde                         | Flock           | Swine          | West Africa Dwarf | 15.12.2016                | Farm Bush  | Stationary                      | Bateima/Njama        | F                   | 20           |
| SIP/MOY/065 | SLE/ 65/16 SW   |               |                | 0.13  | neg     | South  | Moyamba  | Kowa     | Wonde                         | Flock           | Swine          | Swine             | 15.12.2016                | Farm Bush  | Stationary                      | Bateima/Njama        | F                   | 24           |
| SIP/MOY/066 | SLE/ 66/16 SW   | Pool 14       | neg            | 0.14  | neg     | South  | Moyamba  | Fakunya  | Mboama Johnson                | Flock           | Swine          | Large White       | 16.12.2016                | Farm Bush  | Stationary                      | Fadehun              | M                   | 18           |
| SIP/MOY/067 | SLE/ 67/16 SW   |               |                | 0.09  | neg     | South  | Moyamba  | Fakunya  | Mboama Johnson                | Flock           | Swine          | Swine             | Large White               | 16.12.2016 | Farm Bush                       | Stationary           | Fadehun             | M            |
| SIP/MOY/068 | SLE/ 68/16 SW   |               |                | 0.12  | neg     | South  | Moyamba  | Fakunya  | Mboama Johnson                | Flock           | Swine          | Large White       | 16.12.2016                | Farm Bush  | Stationary                      | Fadehun              | M                   | 12           |
| SIP/MOY/069 | SLE/ 69/16 SW   |               |                | 0.20  | neg     | South  | Moyamba  | Fakunya  | Mboama Johnson                | Flock           | Swine          | Large White       | 16.12.2016                | Farm Bush  | Stationary                      | Fadehun              | M                   | 12           |
| SIP/MOY/070 | SLE/ 70/16 SW   |               |                | 0.20  | neg     | South  | Moyamba  | Fakunya  | Mboama Johnson                | Flock           | Swine          | Large White       | 16.12.2016                | Farm Bush  | Stationary                      | Fadehun              | M                   | 12           |
| SIP/MOY/071 | SLE/ 71/16 SW   | Pool 15       | neg            | 0.13  | neg     | South  | Moyamba  | Fakunya  | Mboama Johnson                | Flock           | Swine          | Large White       | 16.12.2016                | Farm Bush  | Stationary                      | Fadehun              | M                   | 24           |
| SIP/MOY/072 | SLE/ 72/16 SW   |               |                | 0.15  | neg     | South  | Moyamba  | Fakunya  | Mboama Johnson                | Flock           | Swine          | Swine             | West Africa Dwarf         | 16.12.2016 | Farm Bush                       | Stationary           | Fadehun             | F            |
| SIP/MOY/073 | SLE/ 73/16 SW   |               |                | 0.14  | neg     | South  | Moyamba  | Fakunya  | Mboama Johnson                | Flock           | Swine          | West Africa Dwarf | 16.12.2016                | Farm Bush  | Stationary                      | Fadehun              | F                   | 36           |
| SIP/MOY/074 | SLE/ 74/16 SW   |               |                | 0.14  | neg     | South  | Moyamba  | Fakunya  | Mboama Johnson                | Flock           | Swine          | West Africa Dwarf | 16.12.2016                | Farm Bush  | Stationary                      | Fadehun              | F                   | 36           |
| SIP/MOY/075 | SLE/ 75/16 SW   |               |                | 0.15  | neg     | South  | Moyamba  | Fakunya  | Mboama Johnson                | Flock           | Swine          | West Africa Dwarf | 16.12.2016                | Farm Bush  | Stationary                      | Fadehun              | F                   | 18           |
| SIP/MOY/076 | SLE/ 76/16 SW   | Pool 16       | Pool 16        | 0.12  | neg     | South  | Moyamba  | Fakunya  | Mogbetu                       | Flock           | Swine          | Large White       | 16.12.2016                | Farm Bush  | Stationary                      | Mboama Johnson       | F                   | 9            |
| SIP/MOY/077 | SLE/ 77/16 SW   |               |                | 0.10  | neg     | South  | Moyamba  | Fakunya  | Mogbetu                       | Flock           | Swine          | Swine             | Large White               | 16.12.2016 | Farm Bush                       | Stationary           | Mboama Johnson      | M            |
| SIP/MOY/078 | SLE/ 78/16 SW   |               |                | 0.16  | neg     | South  | Moyamba  | Fakunya  | Mogbetu                       | Flock           | Swine          | Large White       | 16.12.2016                | Farm Bush  | Stationary                      | Mboama Johnson       | F                   | 24           |
| SIP/MOY/079 | SLE/ 79/16 SW   |               |                | 0.18  | neg     | South  | Moyamba  | Fakunya  | Mogbetu                       | Flock           | Swine          | West Africa Dwarf | 16.12.2016                | Farm Bush  | Stationary                      | Mboama Johnson       | M                   | 12           |
| SIP/MOY/080 | SLE/ 80/16 SW   |               |                | 0.19  | neg     | South  | Moyamba  | Fakunya  | Mogbetu                       | Flock           | Swine</        |                   |                           |            |                                 |                      |                     |              |



|             |               |         |      |      |         |           |                  |                        |                        |                                  |                                  |                                |                                |              |              |             |             |
|-------------|---------------|---------|------|------|---------|-----------|------------------|------------------------|------------------------|----------------------------------|----------------------------------|--------------------------------|--------------------------------|--------------|--------------|-------------|-------------|
| SLP/MOY/192 | SLE/192/16 SW |         | 0.15 | neg  | South   | Moyamba   | kori             | Taïama                 | Flock                  | Swine                            | West Africa Dwarf                | 20.12.2016                     | Farm Bush                      | Stationary   | permanent    | M           | 7           |
| SLP/MOY/193 | SLE/193/16 SW | Pool 39 | neg  | 0.15 | neg     | South     | Moyamba          | kori                   | Taïama                 | Swine                            | Duroc                            | 20.12.2016                     | Farm Bush                      | Stationary   | permanent    | M           | 7           |
| SLP/MOY/194 | SLE/194/16 SW |         | 0.23 | neg  | South   | Moyamba   | kori             | Taïama                 | Flock                  | Swine                            | Duroc                            | 20.12.2016                     | Farm Bush                      | Stationary   | permanent    | M           | 7           |
| SLP/MOY/195 | SLE/195/16 SW |         | 0.16 | neg  | South   | Moyamba   | kori             | Taïama                 | Flock                  | Swine                            | Duroc                            | 20.12.2016                     | Farm Bush                      | Stationary   | permanent    | M           | 7           |
| SLP/MOY/196 | SLE/196/16 SW |         | 0.23 | neg  | South   | Moyamba   | kori             | Taïama                 | Flock                  | Swine                            | Duroc                            | 20.12.2016                     | Farm Bush                      | Stationary   | permanent    | M           | 7           |
| SLP/MOY/197 | SLE/197/16 SW |         | 0.16 | neg  | South   | Moyamba   | kori             | Taïama                 | Flock                  | Swine                            | Large White                      | 20.12.2016                     | Farm Bush                      | Stationary   | permanent    | M           | 7           |
| SLP/MOY/198 | SLE/198/16 SW | Pool 40 | neg  | 0.23 | neg     | South     | Moyamba          | kori                   | Taïama                 | Swine                            | Large White                      | 20.12.2016                     | Farm Bush                      | Stationary   | permanent    | M           | 18          |
| SLP/MOY/199 | SLE/199/16 SW |         | 0.21 | neg  | South   | Moyamba   | kori             | Taïama                 | Flock                  | Swine                            | Large White                      | 20.12.2016                     | Farm Bush                      | Stationary   | permanent    | f           | 18          |
| SLP/MOY/200 | SLE/200/16 SW |         | 0.12 | neg  |         | Moyamba   |                  |                        |                        | Swine                            |                                  | 27.12.2016                     |                                |              |              | f           |             |
| 1           | SLE/201/16 SW |         | 0.12 | neg  | Northen | Bombali   | Makarie Gbanti   | Panlao Village         |                        | Swine                            | Exotic / Multiple crosses        | 19.12.2016                     | Farm bush near community       | Stationary   | Freetown     | f           | Adult (36)  |
| 2           | SLE/202/16 SW | Pool 41 | neg  | 0.10 | neg     | Northen   | Bombali          | Makarie Gbanti         | Panlao Village         | Swine                            | Duroc                            | 19.12.2016                     | Farm bush near community       | Stationary   | Freetown     | M           | Grower (12) |
| 3           | SLE/203/16 SW |         | 0.09 | neg  | Northen | Bombali   | Makarie Gbanti   | Panlao Village         | Swine                  | Duroc                            | 19.12.2016                       | Farm bush near community       | Stationary                     | Freetown     | f            | Adult       |             |
| 4           | SLE/204/16 SW |         | 0.11 | neg  | Northen | Bombali   | Makarie Gbanti   | Panlao Village         | Swine                  | Duroc                            | 19.12.2016                       | Farm bush near community       | Stationary                     | Freetown     | f            | Gilt (8)    |             |
| 5           | SLE/205/16 SW |         | 0.17 | neg  | Northen | Bombali   | Makarie Gbanti   | Panlao Village         | Swine                  | Duroc                            | 19.12.2016                       | Farm bush near community       | Stationary                     | Freetown     | f            | Adult (36+) |             |
| 6           | SLE/206/16 SW |         | 0.13 | neg  | Northen | Bombali   | Makarie Gbanti   | Panlao Village         | Swine                  | Duroc                            | 19.12.2016                       | Farm bush near community       | Stationary                     | Freetown     | f            | Adult       |             |
| 7           | SLE/207/16 SW |         | 0.10 | neg  | Northen | Bombali   | Makarie Gbanti   | Panlao Village         | Swine                  | Duroc                            | 19.12.2016                       | Farm bush near community       | Stationary                     | Freetown     | f            | Adult       |             |
| 8           | SLE/208/16 SW | Pool 42 | neg  | 0.16 | neg     | Northen   | Bombali          | Makarie Gbanti         | Panlao Village         | Swine                            | Duroc                            | 19.12.2016                     | Farm bush near community       | Stationary   | Freetown     | f           | Adult       |
| 9           | SLE/209/16 SW |         | 0.10 | neg  | Northen | Bombali   | Makarie Gbanti   | Panlao Village         | Swine                  | Duroc                            | 19.12.2016                       | Farm bush near community       | Stationary                     | Freetown     | f            | Adult       |             |
| 10          | SLE/210/16 SW |         | 0.09 | neg  | Northen | Bombali   | Makarie Gbanti   | Panlao Village         | Swine                  | Large White Cross                | 19.12.2016                       | Farm bush near community       | Stationary                     | Freetown     | M            | Adult       |             |
| 11          | SLE/211/16 SW |         | 0.10 | neg  | Northen | Bombali   | Makarie Gbanti   | Panlao Village         | Swine                  | Large White Cross                | 19.12.2016                       | Farm bush near community       | Stationary                     | Freetown     | M            | Adult       |             |
| 12          | SLE/212/16 SW |         | 0.21 | neg  | Northen | Bombali   | Makarie Gbanti   | Panlao Village         | Swine                  | Exotic Large White               | 19.12.2016                       | Farm bush near community       | Stationary                     | Makenti town | f            | Adult       |             |
| 13          | SLE/213/16 SW | Pool 43 | neg  | 0.09 | neg     | Northen   | Bombali          | Makarie Gbanti         | Panlao Village         | Swine                            | Exotic Large White               | 19.12.2016                     | Farm bush near community       | Stationary   | Makenti town | f           | Gilt        |
| 14          | SLE/214/16 SW |         | 0.13 | neg  | Northen | Bombali   | Makarie Gbanti   | Panlao Village         | Swine                  | Exotic Large White               | 19.12.2016                       | Farm bush near community       | Stationary                     | Makenti town | f            | Gilt        |             |
| 15          | SLE/215/16 SW |         | 0.20 | neg  | Northen | Bombali   | Makarie Gbanti   | Panlao Village         | Swine                  | Exotic Large White               | 19.12.2016                       | Farm bush near community       | Stationary                     | Bo town      | f            | Adult       |             |
| 16          | SLE/216/16 SW | Pool 44 | neg  | 0.12 | neg     | Northen   | Bombali          | Makarie Gbanti         | Panlao Village         | Swine                            | Exotic Large White               | 19.12.2016                     | Farm bush near community       | Stationary   | Bo town      | M           | Adult       |
| 17          | SLE/217/16 SW |         | 0.14 | neg  | Northen | Bombali   | Makarie Gbanti   | Panlao Village         | Swine                  | Exotic Large White               | 19.12.2016                       | Farm bush near community       | Stationary                     | Bo town      | f            | Adult       |             |
| 18          | SLE/218/16 SW | Pool 44 | neg  | 0.10 | neg     | Northen   | Bombali          | Sanda Tandaren         | Robign Village         | Swine                            | West African Dwarf(WAD)          | 20.12.2016                     | Farm bush near community       | Stationary   | brac         | f           | Adult       |
| 19          | SLE/219/16 SW |         | 0.10 | neg  | Northen | Bombali   | Sanda Tandaren   | Robign Village         | Swine                  | West African Dwarf(WAD)          | 20.12.2016                       | Farm bush near community       | Stationary                     | brac         | M            | Adult       |             |
| 20          | SLE/220/16 SW |         | 0.18 | neg  | Northen | Bombali   | Sanda Tandaren   | Robign Village         | Swine                  | West African Dwarf(WAD)          | 20.12.2016                       | Farm bush near community       | Stationary                     | brac         | M            | Adult       |             |
| 21          | SLE/221/16 SW |         | 0.10 | neg  | Northen | Bombali   | Sanda Tandaren   | Robign Village         | Swine                  | West African Dwarf(WAD)          | 20.12.2016                       | Farm bush near community       | Stationary                     | brac         | f            | Gilt        |             |
| 22          | SLE/222/16 SW |         | 0.11 | neg  | Northen | Bombali   | Sanda Tandaren   | Robign Village         | Swine                  | West African Dwarf(WAD)          | 20.12.2016                       | Farm bush near community       | Stationary                     | brac         | M            | Grower      |             |
| 23          | SLE/223/16 SW | Pool 45 | neg  | 0.15 | neg     | Northen   | Bombali          | Sanda Tandaren         | Robign Village         | Swine                            | West African Dwarf(WAD)          | 20.12.2016                     | Farm bush near community       | Stationary   | brac         | f           | Adult       |
| 24          | SLE/224/16 SW |         | 0.10 | neg  | Northen | Bombali   | Sanda Tandaren   | Robign Village         | Swine                  | West African Dwarf(WAD)          | 20.12.2016                       | Farm bush near community       | Stationary                     | brac         | M            | Adult       |             |
| 25          | SLE/225/16 SW |         | 0.10 | neg  | Northen | Bombali   | Sanda Tandaren   | Robign Village         | Swine                  | West African Dwarf(WAD)          | 20.12.2016                       | Farm bush near community       | Stationary                     | brac         | M            | Adult       |             |
| 26          | SLE/226/16 SW |         | 0.20 | neg  | Northen | Bombali   | Sanda Tandaren   | Robign Village         | Swine                  | Exotic Cross Breed               | 20.12.2016                       | Farm bush near community       | Stationary                     | Lungi        | M            | Adult       |             |
| 27          | SLE/227/16 SW |         | 0.13 | neg  | Northen | Bombali   | Sanda Tandaren   | Robign Village         | Swine                  | Large White Cross                | 20.12.2016                       | Farm bush near community       | Stationary                     | Lungi        | f            | Adult       |             |
| 28          | SLE/228/16 SW | Pool 46 | neg  | 0.26 | neg     | Northen   | Bombali          | Sanda Tandaren         | Robign Village         | Swine                            | Large White Cross                | 20.12.2016                     | Farm bush near community       | Stationary   | Lungi        | f           | Adult       |
| 29          | SLE/229/16 SW |         | 0.34 | neg  | Northen | Bombali   | Sanda Tandaren   | Robign Village         | Swine                  | Exotic Large White               | 20.12.2016                       | Farm bush near community       | Stationary                     | Lungi        | f            | Adult       |             |
| 30          | SLE/230/16 SW |         | 0.19 | neg  | Northen | Bombali   | Sanda Tandaren   | Robign Village         | Swine                  | Exotic Large White               | 20.12.2016                       | Farm bush near community       | Stationary                     | Lungi        | M            | Adult       |             |
| 31          | SLE/231/16 SW |         | 0.12 | neg  | Northen | Bombali   | Sanda Tandaren   | Robign Village         | Swine                  | Exotic Large White               | 20.12.2016                       | Farm bush near community       | Stationary                     | Lungi        | M            | Adult       |             |
| 32          | SLE/232/16 SW |         | 0.22 | neg  | Northen | Bombali   | Sanda Tandaren   | Robign Village         | Swine                  | Exotic Large White               | 20.12.2016                       | Farm bush near community       | Stationary                     | Lungi        | f            | Adult       |             |
| 33          | SLE/233/16 SW | Pool 47 | neg  | 0.36 | neg     | Northen   | Bombali          | Sanda Tandaren         | Robign Village         | Swine                            | Exotic Large White               | 20.12.2016                     | Farm bush near community       | Stationary   | Lungi        | f           | Adult       |
| 34          | SLE/234/16 SW |         | 0.24 | neg  | Northen | Bombali   | Sanda Tandaren   | Robign Village         | Swine                  | Duroc                            | 20.12.2016                       | Farm bush near community       | Stationary                     | Lungi        | M            | Adult       |             |
| 35          | SLE/235/16 SW |         | 0.20 | neg  | Northen | Bombali   | Sanda Tandaren   | Robign Village         | Swine                  | Duroc                            | 20.12.2016                       | Farm bush near community       | Stationary                     | Lungi        | f            | Adult       |             |
| 36          | SLE/236/16 SW |         | 0.11 | neg  | Northen | Bombali   | Gbanti Kamaranka | Kamaranka              | Swine                  | West African Dwarf               | 21.12.2016                       | Community                      | Stationary                     | Kamalo       | f            | Adult       |             |
| 37          | SLE/237/16 SW |         | 0.09 | neg  | Northen | Bombali   | Gbanti Kamaranka | Kamaranka              | Swine                  | West African Dwarf               | 21.12.2016                       | Community                      | Stationary                     | Kamalo       | M            | Adult       |             |
| 38          | SLE/238/16 SW | Pool 48 | neg  | 0.14 | neg     | Northen   | Bombali          | Gbanti Kamaranka       | Kamaranka              | Swine                            | West African Dwarf               | 22.12.2016                     | Community                      | Stationary   | Kamalo       | f           | Adult       |
| 39          | SLE/239/16 SW |         | 0.14 | neg  | Northen | Bombali   | Gbanti Kamaranka | Kamaranka              | Swine                  | West African Dwarf               | 23.12.2016                       | Community                      | Stationary                     | Kamalo       | f            | Adult       |             |
| 40          | SLE/240/16 SW |         | 0.09 | neg  | Northen | Bombali   | Gbanti Kamaranka | Kamaranka              | Swine                  | West African Dwarf               | 24.12.2016                       | Community                      | Stationary                     | Kamalo       | f            | Adult       |             |
| 41          | SLE/241/16 SW |         | 0.11 | neg  | Northen | Bombali   | Gbanti Kamaranka | Kamaranka              | Swine                  | West African Dwarf               | 25.12.2016                       | Community                      | Stationary                     | Kamalo       | M            | Adult       |             |
| 42          | SLE/242/16 SW |         | 0.10 | neg  | Northen | Bombali   | Gbanti Kamaranka | Kamaranka              | Swine                  | West African Dwarf               | 26.12.2016                       | Community                      | Stationary                     | Kamalo       | M            | Adult       |             |
| 43          | SLE/243/16 SW | Pool 49 | neg  | 0.10 | neg     | Northen   | Bombali          | Gbanti Kamaranka       | Kamaranka              | Swine                            | West African Dwarf               | 27.12.2016                     | Community                      | Stationary   | Kamalo       | f           | Adult       |
| 44          | SLE/244/16 SW |         | 0.10 | neg  | Northen | Bombali   | Gbanti Kamaranka | Kamaranka              | Swine                  | West African Dwarf               | 28.12.2016                       | Community                      | Stationary                     | Kamalo       | M            | Adult       |             |
| 45          | SLE/245/16 SW |         | 0.12 | neg  | Northen | Bombali   | Gbanti Kamaranka | Kamaranka              | Swine                  | West African Dwarf               | 29.12.2016                       | Community                      | Stationary                     | Kamalo       | f            | Adult       |             |
| 46          | SLE/246/16 SW |         | 0.11 | neg  | Northen | Bombali   | Gbanti Kamaranka | Kamaranka              | Swine                  | West African Dwarf               | 30.12.2016                       | Community                      | Stationary                     | Kamalo       | f            | Adult       |             |
| 47          | SLE/247/16 SW |         | 0.12 | neg  | Northen | Bombali   | Gbanti Kamaranka | Kamaranka              | Swine                  | West African Dwarf               | 31.12.2016                       | Community                      | Stationary                     | Kamalo       | f            | Adult       |             |
| 48          | SLE/248/16 SW | Pool 50 | neg  | 0.12 | neg     | Northen   | Bombali          | Gbanti Kamaranka       | Kamaranka              | Swine                            | West African Dwarf               | 01.01.2017                     | Community                      | Stationary   | Kamalo       | f           | Adult       |
| 49          | SLE/249/16 SW |         | 0.10 | neg  | Northen | Bombali   | Gbanti Kamaranka | Kamaranka              | Swine                  | West African Dwarf               | 02.01.2017                       | Community                      | Stationary                     | Kamalo       | f            | Adult       |             |
| 50          | SLE/250/16 SW |         | 0.09 | neg  | Northen | Port Loko | Buya Romende     | Foredugu Village       | Swine                  | Back Shire and Large White Cross | 21.12.2016                       | Community                      | Stationary                     | Murildo Farm | f            | Adult       |             |
| 51          | SLE/251/16 SW |         | 0.09 | neg  | Northen | Port Loko | Buya Romende     | Foredugu Village       | Swine                  | Back Shire and Large White Cross | 21.12.2016                       | Community                      | Stationary                     | Murildo Farm | f            | Adult       |             |
| 52          | SLE/252/16 SW | Pool 51 | neg  | 0.10 | neg     | Northen   | Port Loko        | Buya Romende           | Foredugu Village       | Swine                            | Back Shire and Large White Cross | 21.12.2016                     | Community                      | Stationary   | Murildo Farm | f           | Adult       |
| 53          | SLE/253/16 SW |         | 0.21 | neg  | Northen | Port Loko | Buya Romende     | Foredugu Village       | Swine                  | Back Shire and Large White Cross | 21.12.2016                       | Community                      | Stationary                     | Murildo Farm | f            | Adult       |             |
| 54          | SLE/254/16 SW |         | 0.09 | neg  | Northen | Port Loko | Buya Romende     | Foredugu Village       | Swine                  | Back Shire and Large White Cross | 21.12.2016                       | Community                      | Stationary                     | Murildo Farm | M            | Adult       |             |
| 55          | SLE/255/16 SW |         | 0.11 | neg  | Northen | Port Loko | Buya Romende     | Foredugu Village       | Swine                  | Back Shire and Large White Cross | 21.12.2016                       | Community                      | Stationary                     | Murildo Farm | f            | Adult       |             |
| 56          | SLE/256/16 SW |         | 0.13 | neg  | Northen | Port Loko | Buya Romende     | Foredugu Village       | Swine                  | Back Shire and Large White Cross | 21.12.2016                       | Community                      | Stationary                     | Murildo Farm | M            | Adult       |             |
| 57          | SLE/257/16 SW |         | 0.14 | neg  | Northen | Port Loko | Buya Romende     | Foredugu Village       | Swine                  | Back Shire and Large White Cross | 21.12.2016                       | Community                      | Stationary                     | Murildo Farm | M            | Adult       |             |
| 58          | SLE/258/16 SW | Pool 52 | neg  | 0.09 | neg     | Northen   | Port Loko        | Buya Romende           | Foredugu Village       | Swine                            | Back Shire and Large White Cross | 21.12.2016                     | Community                      | Stationary   | Murildo Farm | M           | Adult       |
| 59          | SLE/259/16 SW |         | 0.13 | neg  | Northen | Port Loko | Buya Romende     | Foredugu Village       | Swine                  | Back Shire and Large White Cross | 21.12.2016                       | Community                      | Stationary                     | Murildo Farm | f            | Adult       |             |
| 60          | SLE/260/16 SW |         | 0.12 | neg  | Northen | Port Loko | Buya Romende     | Foredugu Village       | Swine                  | Back Shire and Large White Cross | 21.12.2016                       | Community                      | Stationary                     | Murildo Farm | f            | Adult       |             |
| 61          | SLE/261/16 SW |         | 0.10 | neg  | Northen | Port Loko | Buya Romende     | Foredugu Village       | Swine                  | Back Shire and Large White Cross | 21.12.2016                       | Community                      | Stationary                     | Murildo Farm | f            | Adult       |             |
| 62          | SLE/262/16 SW | Pool 53 | neg  | 0.10 | neg     | Northen   | Port Loko        | Buya Romende           | Foredugu Village       | Swine                            | Back Shire and Large White Cross | 21.12.2016                     | Community                      | Stationary   | Murildo Farm | f           | Grower      |
| 63          | SLE/263/16 SW |         | 0.11 | neg  | Northen | Port Loko | Buya Romende     | Foredugu Village       | Swine                  | Back Shire and Large White Cross | 21.12.2016                       | Community                      | Stationary                     | Murildo Farm | M            | Adult       |             |
| 64          | SLE/264/16 SW |         | 0.14 | neg  | Northen | Port Loko | Buya Romende     | Foredugu Village       | Swine                  | Back Shire and Large White Cross | 21.12.2016                       | Community                      | Stationary                     | Murildo Farm | M            | Adult       |             |
| 65          | SLE/265/16 SW |         | 0.09 | neg  | Northen | Port Loko | Buya Romende     | Foredugu Village       | Swine                  | Back Shire and Large White Cross | 21.12.2016                       | Community                      | Stationary                     | Murildo Farm | M            | Adult       |             |
| 66          | SLE/266/16 SW |         | 0.17 | neg  | Northen | Port Loko | Buya Romende     | Foredugu Village       | Swine                  | Durock Large White Cross         | 21.12.2016                       | Farm Bush                      | Stationary                     | Bumbuna      | f            | Grower      |             |
| 67          | SLE/267/16 SW | Pool 54 | neg  | 0.17 | neg     | Northen   | Port Loko        | Buya Romende           | Foredugu Village       | Swine                            | Durock Large White Cross         | 21.12.2016                     | Secondary Forest               | Stationary   | Bumbuna      | f           | Adult       |
| 68          | SLE/268/16 SW |         | 0.14 | neg  | Northen | Port Loko | Buya Romende     | Foredugu Village       | Swine                  | Durock Large White Cross         | 21.12.2016                       | Secondary Forest               | Stationary                     | Bumbuna      | f            | 1BR         |             |
| 69          | SLE/269/16 SW |         | 0.11 | neg  | Northen | Port Loko | Buya Romende     | Foredugu Village       | Swine                  | Back Shire and Large White Cross | 21.12.2016                       | Secondary Forest               | Stationary                     | Bumbuna      | f            | Adult       |             |
| 70          | SLE/270/16 SW |         | 0.11 | neg  | Northen | Port Loko | Buya Romende     | Foredugu Village       | Swine                  | Durock Large White Cross         | 21.12.2016                       | Secondary Forest               | Stationary                     | BRAC         | f            | Adult       |             |
| 71          | SLE/271/16 SW |         | 0.12 | neg  | Northen | Port Loko | Buya Romende     | Foredugu Village       | Swine                  | Durock Large White Cross         | 21.12.2016                       | Secondary Forest               | Stationary                     | BRAC         | f            | Grower      |             |
| 72          | SLE/272/16 SW |         | 0.10 | neg  | Northen | Port Loko | Buya Romende     | Foredugu Village       | Swine                  | Durock Large White Cross         | 21.12.2016                       | Secondary Forest               | Stationary                     | BRAC         | f            | Grower      |             |
| 73          | SLE/273/16 SW | Pool 55 | neg  | 0.10 | neg     | Northen   | Port Loko        | Buya Romende           | Foredugu Village       | Swine                            | Durock Large White Cross         | 21.12.2016                     | Secondary Forest               | Stationary   | Murildo Farm | M           | Grower      |
| 74          | SLE/274/16 SW |         | 0.09 | neg  | Northen | Port Loko | Buya Romende     | Foredugu Village       | Swine                  | Durock Large White Cross         | 21.12.2016                       | Secondary Forest               | Stationary                     | Murildo Farm | M            | Grower      |             |
| 75          | SLE/275/16 SW |         | n/a  | n/a  | Northen | Port Loko | Marampa          | Lunsar Town (Old Town) | Swine                  | Back Shire and Large White Cross | 21.12.2016                       | Inland Valley (Semi Intensive) | Stationary                     | Murildo Farm | M            | Adult       |             |
| 76          | SLE/276/16 SW |         | n/a  | n/a  | Northen | Port Loko | Marampa          | Lunsar Town (Old Town) | Swine                  | Back Shire and Large White Cross | 21.12.2016                       | Inland Valley (Semi Intensive) | Stationary                     | Murildo Farm | M            | Adult       |             |
| 77          | SLE/277/16 SW | Pool 56 | neg  | 0.09 | neg     | Northen   | Port Loko        | Marampa                | Lunsar Town (Old Town) | Swine                            | Back Shire and Large White Cross | 21.12.2016                     | Inland Valley (Semi Intensive) | Stationary   | Murildo Farm | M           | Adult       |
| 78          | SLE/278/16 SW |         | 0.09 | neg  | Northen | Port Loko | Marampa          | Lunsar Town (Old Town) | Swine                  | Back Shire and Large White Cross | 21.12.2016</                     |                                |                                |              |              |             |             |

|     |               |         |     |      |     |          |           |          |                            |          |       |                            |            |                                |            |              |   |        |
|-----|---------------|---------|-----|------|-----|----------|-----------|----------|----------------------------|----------|-------|----------------------------|------------|--------------------------------|------------|--------------|---|--------|
| 89  | SLE/289/16 SW | Pool 59 | neg | 0.15 | neg | Northern | Port Loko | Marampa  | Lunsar Town (Old Town)     | Pig farm | Swine | Large White                | 21.12.2016 | Inland Valley (Semi Intensive) | Stationary | BRAC         | F | Grower |
| 90  | SLE/290/16 SW |         |     | 0.11 | neg | Northern | Port Loko | Marampa  | Lunsar Town (Old Town)     | Pig farm | Swine | Large White                | 21.12.2016 | Inland Valley (Semi Intensive) | Stationary | BRAC         | F | Grower |
| 91  | SLE/291/16 SW |         |     | 0.14 | neg | Northern | Port Loko | Marampa  | Lunsar Town (Old Town)     | Pig farm | Swine | Large White                | 21.12.2016 | Inland Valley (Semi Intensive) | Stationary | BRAC         | F | Gilt   |
| 92  | SLE/292/16 SW |         |     | 0.08 | neg | Northern | Port Loko | Marampa  | Lunsar Town (Old Town)     | Pig farm | Swine | Back Shire                 | 21.12.2016 | Community                      | Stationary | BRAC         | F | Adult  |
| 93  | SLE/293/16 SW | Pool 60 | neg | 0.09 | neg | Northern | Port Loko | Marampa  | Lunsar Town (Old Town)     | Pig farm | Swine | Back Shire                 | 21.12.2016 | Community                      | Stationary | BRAC         | M | Adult  |
| 94  | SLE/294/16 SW |         |     | 0.08 | neg | Northern | Port Loko | Marampa  | Lunsar Town (Old Town)     | Pig farm | Swine | Large White                | 21.12.2016 | Community                      | Stationary | BRAC         | F | Gilt   |
| 95  | SLE/295/16 SW |         |     | 0.08 | neg | Northern | Port Loko | Marampa  | Lunsar Town (Old Town)     | Pig farm | Swine | Large White                | 21.12.2016 | Community                      | Stationary | BRAC         | F | Gilt   |
| 96  | SLE/296/16 SW |         |     | 0.08 | neg | Northern | Port Loko | Marampa  | Lunsar Town (Old Town)     | Pig farm | Swine | Large White Durock         | 21.12.2016 | Community                      | Stationary | BRAC         | F | Adult  |
| 97  | SLE/297/16 SW | Pool 61 | neg | 0.12 | neg | Northern | Port Loko | Marampa  | Lunsar Town (Old Town)     | Pig farm | Swine | Large White                | 21.12.2016 | Community                      | Stationary | Muraldo Farm | F | Adult  |
| 98  | SLE/298/16 SW |         |     | 0.09 | neg | Northern | Port Loko | Marampa  | Lunsar Town (Old Town)     | Pig farm | Swine | Large White                | 21.12.2016 | Community                      | Stationary | Muraldo Farm | M | Adult  |
| 99  | SLE/299/16 SW |         |     | 0.09 | neg | Northern | Port Loko | Marampa  | Lunsar Town (Old Town)     | Pig farm | Swine | Large White                | 21.12.2016 | Community                      | Stationary | Muraldo Farm | M | Adult  |
| 100 | SLE/300/16 SW |         |     | 0.10 | neg | Northern | Port Loko | Marampa  | Lunsar Town (Old Town)     | Pig farm | Swine | Large White                | 21.12.2016 | Community                      | Stationary | Muraldo Farm | F | Adult  |
| 101 | SLE/301/16 SW | Pool 62 | pos | 0.10 | neg | Northern | Port Loko | Marampa  | Lunsar Town (Old Town)     | Pig farm | Swine | Large White                | 21.12.2016 | Community                      | Stationary | Muraldo Farm | F | Adult  |
| 102 | SLE/302/16 SW |         |     | 3.88 | neg | Northern | Port Loko | Marampa  | Lunsar Town (Old Town)     | Pig farm | Swine | Large White                | 21.12.2016 | Community                      | Stationary | Muraldo Farm | F | Adult  |
| 103 | SLE/303/16 SW |         |     | 0.08 | neg | Northern | Port Loko | Marampa  | Lunsar Road Port Loko Town | pig farm | Swine | West African Dwarf         | 22.12.2016 | Community                      | Free Range | Binkolo      | F | Adult  |
| 104 | SLE/304/16 SW |         |     | 4.00 | pos | Northern | Port Loko | Marampa  | Lunsar Road Port Loko Town | pig farm | Swine | West African Dwarf         | 22.12.2016 | Community                      | Free Range | Binkolo      | F | Adult  |
| 105 | SLE/305/16 SW | Pool 63 | pos | 4.00 | pos | Northern | Port Loko | Marampa  | Lunsar Road Port Loko Town | pig farm | Swine | West African Dwarf         | 22.12.2016 | Community                      | Free Range | Binkolo      | F | Adult  |
| 106 | SLE/306/16 SW |         |     | 3.14 | pos | Northern | Port Loko | Marampa  | Lunsar Road Port Loko Town | pig farm | Swine | West African Dwarf         | 22.12.2016 | Community                      | Free Range | Binkolo      | M | Adult  |
| 107 | SLE/307/16 SW |         |     | 4.00 | pos | Northern | Port Loko | Marampa  | Lunsar Road Port Loko Town | pig farm | Swine | West African Dwarf         | 22.12.2016 | Community                      | Free Range | Binkolo      | F | Adult  |
| 108 | SLE/308/16 SW |         |     | 3.95 | pos | Northern | Port Loko | Marampa  | Lunsar Road Port Loko Town | pig farm | Swine | West African Dwarf         | 22.12.2016 | Community                      | Free Range | Binkolo      | F | Adult  |
| 109 | SLE/309/16 SW | Pool 64 | neg | 4.00 | pos | Northern | Port Loko | Marampa  | Lunsar Road Port Loko Town | pig farm | Swine | West African Dwarf         | 22.12.2016 | Community                      | Free Range | Binkolo      | F | Adult  |
| 110 | SLE/310/16 SW |         |     | 4.00 | pos | Northern | Port Loko | Marampa  | Lunsar Road Port Loko Town | pig farm | Swine | West African Dwarf         | 22.12.2016 | Community                      | Free Range | Binkolo      | F | Gilt   |
| 111 | SLE/311/16 SW |         |     | 3.99 | pos | Northern | Port Loko | Marampa  | Lunsar Road Port Loko Town | pig farm | Swine | West African Dwarf         | 22.12.2016 | Community                      | Free Range | Binkolo      | F | Grower |
| 112 | SLE/312/16 SW |         |     | 0.22 | neg | Northern | Port Loko | Marampa  | Lunsar Road Port Loko Town | pig farm | Swine | West African Dwarf         | 22.12.2016 | Community                      | Free Range | Binkolo      | F | Gilt   |
| 113 | SLE/313/16 SW | Pool 65 | pos | 4.00 | pos | Northern | Port Loko | Marampa  | Lunsar Road Port Loko Town | pig farm | Swine | West African Dwarf         | 22.12.2016 | Community                      | Free Range | Binkolo      | F | Gilt   |
| 114 | SLE/314/16 SW |         |     | 0.75 | pos | Northern | Port Loko | Marampa  | Lunsar Road Port Loko Town | pig farm | Swine | West African Dwarf         | 22.12.2016 | Community                      | Free Range | Freetown     | F | Gilt   |
| 115 | SLE/315/16 SW |         |     | 0.16 | neg | Northern | Port Loko | Marampa  | Lunsar Road Port Loko Town | pig farm | Swine | Durock                     | 22.12.2016 | Community                      | Free Range | Freetown     | M | Adult  |
| 116 | SLE/316/16 SW |         |     | 0.17 | neg | Northern | Port Loko | Marampa  | Lunsar Road Port Loko Town | pig farm | Swine | Large White                | 22.12.2016 | Community                      | Free Range | Freetown     | M | Adult  |
| 117 | SLE/317/16 SW | Pool 66 | neg | 0.16 | neg | Northern | Port Loko | Marampa  | Lunsar Road Port Loko Town | pig farm | Swine | Large White                | 22.12.2016 | Community                      | Free Range | Freetown     | F | Adult  |
| 118 | SLE/318/16 SW |         |     | 4.00 | pos | Northern | Port Loko | Marampa  | Lunsar Road Port Loko Town | pig farm | Swine | Large White                | 22.12.2016 | Community                      | Free Range | Freetown     | F | Adult  |
| 119 | SLE/319/16 SW |         |     | 4.00 | pos | Northern | Port Loko | Marampa  | Lunsar Road Port Loko Town | pig farm | Swine | Durock                     | 22.12.2016 | Community                      | Free Range | Freetown     | M | Adult  |
| 120 | SLE/320/16 SW |         |     | 0.11 | neg | Northern | Port Loko | Marampa  | Lunsar Road Port Loko Town | pig farm | Swine | Durock                     | 22.12.2016 | Community                      | Free Range | Freetown     | M | Adult  |
| 121 | SLE/321/16 SW | Pool 67 | neg | 0.12 | neg | Northern | Port Loko | Marampa  | Lunsar Road Port Loko Town | pig farm | Swine | Durock                     | 22.12.2016 | Community                      | Free Range | Freetown     | M | Adult  |
| 122 | SLE/322/16 SW |         |     | 3.63 | pos | Northern | Port Loko | Marampa  | Lunsar Road Port Loko Town | pig farm | Swine | Durock                     | 22.12.2016 | Community                      | Free Range | Freetown     | F | Adult  |
| 123 | SLE/323/16 SW |         |     | 0.98 | pos | Northern | Port Loko | Marampa  | Lunsar Town (Old Town)     | Pig farm | Swine | Large White                | 22.12.2016 | Community                      | Stationary | Pepef        | F | Adult  |
| 124 | SLE/324/16 SW |         |     | 0.23 | neg | Northern | Port Loko | Marampa  | Lunsar Town (Old Town)     | Pig farm | Swine | Large White                | 22.12.2016 | Community                      | Stationary | Pepef        | F | Adult  |
| 125 | SLE/325/16 SW | Pool 68 | neg | 0.10 | neg | Northern | Port Loko | Marampa  | Lunsar Town (Old Town)     | Pig farm | Swine | Large White                | 22.12.2016 | Community                      | Stationary | Fanya Farm   | M | Grower |
| 126 | SLE/326/16 SW |         |     | 0.09 | neg | Northern | Port Loko | Marampa  | Lunsar Town (Old Town)     | Pig farm | Swine | Large White                | 22.12.2016 | Community                      | Stationary | Fanya Farm   | F | Gilt   |
| 127 | SLE/327/16 SW |         |     | 0.09 | neg | Northern | Port Loko | Marampa  | Lunsar Town (Old Town)     | Pig farm | Swine | Large White                | 22.12.2016 | Community                      | Stationary | Fanya Farm   | F | Gilt   |
| 128 | SLE/328/16 SW |         |     | 0.12 | neg | Northern | Port Loko | Marampa  | Lunsar Town (Old Town)     | Pig farm | Swine | Large White                | 22.12.2016 | Community                      | Stationary | Fanya Farm   | F | Gilt   |
| 129 | SLE/329/16 SW | Pool 69 | neg | 0.12 | neg | Northern | Port Loko | Marampa  | Lunsar Town (Old Town)     | Pig farm | Swine | Large White                | 22.12.2016 | Community                      | Stationary | Fanya Farm   | F | Gilt   |
| 130 | SLE/330/16 SW |         |     | 0.12 | neg | Northern | Port Loko | Marampa  | Lunsar Town (Old Town)     | Pig farm | Swine | Large White                | 22.12.2016 | Community                      | Stationary | Fanya Farm   | M | Grower |
| 131 | SLE/331/16 SW |         |     | 0.21 | neg | Northern | Port Loko | Marampa  | Lunsar Town (Old Town)     | Pig farm | Swine | Large White                | 22.12.2016 | Community                      | Stationary | Fanya Farm   | F | Gilt   |
| 132 | SLE/332/16 SW |         |     | 0.09 | neg | Northern | Port Loko | Marampa  | Lunsar Town (Old Town)     | Pig farm | Swine | Large White                | 22.12.2016 | Community                      | Stationary | Fanya Farm   | F | Gilt   |
| 133 | SLE/333/16 SW | Pool 70 | neg | 0.09 | neg | Northern | Port Loko | Marampa  | Lunsar Town (Old Town)     | Pig farm | Swine | Large White                | 22.12.2016 | Community                      | Stationary | Fanya Farm   | M | Adult  |
| 134 | SLE/334/16 SW |         |     | 0.09 | neg | Northern | Port Loko | Marampa  | Lunsar Town (Old Town)     | Pig farm | Swine | Large White                | 22.12.2016 | Community                      | Stationary | Fanya Farm   | F | Adult  |
| 135 | SLE/335/16 SW |         |     | 0.09 | neg | Northern | Port Loko | Marampa  | Lunsar Town (Old Town)     | Pig farm | Swine | Large White                | 22.12.2016 | Community                      | Stationary | Fanya Farm   | F | Adult  |
| 136 | SLE/336/16 SW |         |     | 0.10 | neg | Northern | Port Loko | Marampa  | Lunsar Town (Old Town)     | Pig farm | Swine | Large White                | 22.12.2016 | Community                      | Stationary | Fanya Farm   | M | Adult  |
| 137 | SLE/337/16 SW | Pool 71 | neg | 0.15 | neg | Northern | Port Loko | Marampa  | Lunsar Town (Old Town)     | Pig farm | Swine | Large White                | 22.12.2016 | Community                      | Stationary | Fanya Farm   | F | Gilt   |
| 138 | SLE/338/16 SW |         |     | 0.12 | neg | Northern | Port Loko | Marampa  | Lunsar Town (Old Town)     | Pig farm | Swine | Large White                | 22.12.2016 | Community                      | Stationary | Fanya Farm   | F | Gilt   |
| 139 | SLE/339/16 SW |         |     | 0.12 | neg | Northern | Port Loko | Marampa  | Lunsar Town (Old Town)     | Pig farm | Swine | Large White                | 22.12.2016 | Community                      | Stationary | Fanya Farm   | F | Gilt   |
| 140 | SLE/340/16 SW |         |     | 0.11 | neg | Northern | Port Loko | Marampa  | Lunsar Town (Old Town)     | Pig farm | Swine | Large White                | 22.12.2016 | Community                      | Stationary | Fanya Farm   | F | Gilt   |
| 141 | SLE/341/16 SW | Pool 72 | neg | 0.12 | neg | Northern | Port Loko | Marampa  | Lunsar Town (Old Town)     | Pig farm | Swine | Large White                | 22.12.2016 | Community                      | Stationary | Fanya Farm   | M | Adult  |
| 142 | SLE/342/16 SW |         |     | 0.11 | neg | Northern | Port Loko | Marampa  | Lunsar Town (Old Town)     | Pig farm | Swine | Large White                | 22.12.2016 | Community                      | Stationary | Fanya Farm   | M | Grower |
| 143 | SLE/343/16 SW |         |     | 0.14 | neg | Northern | Port Loko | Marampa  | Lunsar Town (Old Town)     | Pig farm | Swine | Large White                | 22.12.2016 | Community                      | Stationary | Brac         | F | Gilt   |
| 144 | SLE/344/16 SW |         |     | 0.14 | neg | Northern | Port Loko | Marampa  | Lunsar Town (Old Town)     | Pig farm | Swine | Large White                | 22.12.2016 | Community                      | Stationary | Brac         | M | Grower |
| 145 | SLE/345/16 SW | Pool 73 | neg | 0.12 | neg | Northern | Port Loko | Marampa  | Lunsar Town (Old Town)     | Pig farm | Swine | Large White                | 22.12.2016 | Community                      | Stationary | Brac         | F | Gilt   |
| 146 | SLE/346/16 SW |         |     | 0.11 | neg | Northern | Port Loko | Marampa  | Lunsar Town (Old Town)     | Pig farm | Swine | Large White                | 22.12.2016 | Community                      | Stationary | Brac         | F | Adult  |
| 147 | SLE/347/16 SW |         |     | 0.13 | neg | Northern | Port Loko | Marampa  | Lunsar Town (Old Town)     | Pig farm | Swine | Large White                | 22.12.2016 | Community                      | Stationary | Brac         | F | Adult  |
| 148 | SLE/348/16 SW |         |     | 0.13 | neg | Northern | Port Loko | Marampa  | Lunsar Town (Old Town)     | Pig farm | Swine | Large White                | 22.12.2016 | Community                      | Stationary | Brac         | F | Adult  |
| 149 | SLE/349/16 SW | Pool 74 | neg | 0.14 | neg | Northern | Port Loko | Marampa  | Lunsar Town (Old Town)     | Pig farm | Swine | Large White                | 22.12.2016 | Community                      | Stationary | Brac         | F | Gilt   |
| 150 | SLE/350/16 SW |         |     | 0.10 | neg | Northern | Port Loko | Marampa  | Lunsar Town (Old Town)     | Pig farm | Swine | Large White                | 22.12.2016 | Community                      | Stationary | Brac         | F | Adult  |
| 151 | SLE/351/16 SW |         |     | 0.10 | neg | Northern | Port Loko | Marampa  | Lunsar Town (Old Town)     | Pig farm | Swine | Large White                | 22.12.2016 | Community                      | Stationary | Brac         | F | Adult  |
| 152 | SLE/352/16 SW |         |     | 0.10 | neg | Northern | Port Loko | Marampa  | Lunsar Town (Old Town)     | Pig farm | Swine | Large White                | 22.12.2016 | Community                      | Stationary | Brac         | M | Adult  |
| 153 | SLE/353/16 SW | Pool 75 | neg | 0.18 | neg | Northern | Bombali   | Sheborah | New York                   | Pig farm | Swine | Cross of Duroc & Backshire | 23.12.2016 | Farm bush                      | Stationary | Makenti town | M | Grower |
| 154 | SLE/354/16 SW |         |     | 0.14 | neg | Northern | Bombali   | Sheborah | New York                   | Pig farm | Swine | "                          | 23.12.2016 | Farm bush near community       | Stationary | Makenti town | M | Grower |
| 155 | SLE/355/16 SW |         |     | 0.10 | neg | Northern | Bombali   | Sheborah | New York                   | Pig farm | Swine | "                          | 23.12.2016 | Farm bush near community       | Stationary | Makenti town | M | Adult  |
| 156 | SLE/356/16 SW |         |     | 0.10 | neg | Northern | Bombali   | Sheborah | New York                   | Pig farm | Swine | "                          | 23.12.2016 | Farm bush near community       | Stationary | Makenti town | F | Gilt   |
| 157 | SLE/357/16 SW | Pool 76 | neg | 0.10 | neg | Northern | Bombali   | Sheborah | New York                   | Pig farm | Swine | "                          | 23.12.2016 | Farm bush near community       | Stationary | Makenti town | F | Gilt   |
| 158 | SLE/358/16 SW |         |     | 0.20 | neg | Northern | Bombali   | Sheborah | New York                   | Pig farm | Swine | "                          | 23.12.2016 | Farm bush near community       | Stationary | Makenti town | F | Gilt   |
| 159 | SLE/359/16 SW |         |     | 0.19 | neg | Northern | Bombali   | Sheborah | New York                   | Pig farm | Swine | "                          | 23.12.2016 | Farm bush near community       | Stationary | Makenti town | F | Adult  |
| 160 | SLE/360/16 SW |         |     | 0.17 | neg | Northern | Bombali   | Sheborah | New York                   | Pig farm | Swine | "                          | 23.12.2016 | Farm bush near community       | Stationary | Makenti town | M | Adult  |
| 161 | SLE/361/16 SW | Pool 77 | neg | 0.12 | neg | Northern | Bombali   | Sheborah | New York                   | Pig farm | Swine | "                          | 23.12.2016 | Farm bush near community       | Stationary | Makenti town | M | Adult  |
| 162 | SLE/362/16 SW |         |     | 0.11 | neg | Northern | Bombali   | Sheborah | New York                   | Pig farm | Swine | "                          | 23.12.2016 | Farm bush near community       | Stationary | Makenti town | F | Adult  |
| 163 | SLE/363/16 SW |         |     | 0.14 | neg | Northern | Bombali   | Sheborah | New York                   | Pig farm | Swine | "                          | 23.12.2016 | Farm bush near community       | Stationary | Makenti town | F | Adult  |
| 164 | SLE/364/16 SW |         |     | 0.11 | neg | Northern | Bombali   | Sheborah | New York                   | Pig farm | Swine | Multiple Crosses           | 23.12.2016 | Farm bush                      | Stationary | Waterloo     | F | Adult  |
| 165 | SLE/365/16 SW | Pool 78 | neg | 0.09 | neg | Northern | Bombali   | Sheborah | New York                   | Pig farm | Swine | Multiple Crosses           | 23.12.2016 | Farm bush                      | Stationary | Waterloo     | F | Adult  |
| 166 | SLE/366/16 SW |         |     | 0.10 | neg | Northern | Bombali   | Sheborah | New York                   | Pig farm | Swine | Multiple Crosses           | 23.12.2016 | Farm bush                      | Stationary | Waterloo     | F | Adult  |
| 167 | SLE/367/16 SW |         |     | 0.09 | neg | Northern | Bombali   | Sheborah | New York                   | Pig farm | Swine | Multiple Crosses           | 23.12.2016 | Farm bush                      | Stationary | Waterloo     | F | Adult  |
| 168 | SLE/368/16 SW |         |     | 0.10 | neg | Northern | Bombali   | Sheborah | New York                   | Pig farm | Swine | Multiple Crosses           | 23.12.2016 | Farm bush                      | Stationary | Waterloo     | M | Adult  |
| 169 | SLE/369/16 SW | Pool 79 | neg | 0.11 | neg | Northern | Bombali   | Sheborah | New York                   | Pig farm | Swine | Multiple Crosses           | 23.12.2016 | Farm bush                      | Stationary | Waterloo     | F | Adult  |
| 170 | SLE/370/16 SW |         |     | 0.13 | neg | Northern | Bombali   | Sheborah | New York                   | Pig farm | Swine | Multiple Crosses           | 23.12.2016 | Farm bush                      | Stationary | Waterloo     | F | Gilt   |
| 171 | SLE/371/16 SW |         |     | 0.18 | neg | Northern | Bombali   | Sheborah | New York                   | Pig farm | Swine | Multiple Crosses           | 23.12.2016 | Farm bush                      | Stationary | Waterloo     | F | Adult  |
| 172 | SLE/372/16 SW |         |     | 0.14 | neg | Northern | Bombali   | Sheborah | New York                   | Pig farm | Swine | Multiple Crosses           | 23.12.2016 | Farm bush                      | Stationary | Waterloo     | F | Adult  |
| 173 | SLE/373/16 SW | Pool 80 | neg | 0.11 | neg | Northern | Bombali   | Sheborah | New York                   |          |       |                            |            |                                |            |              |   |        |

|     |                |         |     |      |     |                          |          |          |          |          |       |                  |            |           |            |          |   |        |
|-----|----------------|---------|-----|------|-----|--------------------------|----------|----------|----------|----------|-------|------------------|------------|-----------|------------|----------|---|--------|
| 186 | SLE/ 386/16 SW | Pool 78 | neg | 0.11 | neg | Northern                 | Bombali  | Sheborah | New York | Pig Farm | Swine | Multiple Crosses | 23.12.2016 | Farm bush | Stationary | Waterloo | M | Adult  |
| 187 | SLE/ 387/16 SW |         |     | 0.11 | neg | Northern                 | Bombali  | Sheborah | New York | Pig Farm | Swine | Multiple Crosses | 23.12.2016 | Farm bush | Stationary | Waterloo | F | Adult  |
| 188 | SLE/ 388/16 SW |         |     | 0.13 | neg | Northern                 | Bombali  | Sheborah | New York | Pig Farm | Swine | Multiple Crosses | 23.12.2016 | Farm bush | Stationary | Waterloo | F | Adult  |
| 189 | SLE/ 389/16 SW |         |     | 0.10 | neg | Northern                 | Bombali  | Sheborah | New York | Pig Farm | Swine | Multiple Crosses | 23.12.2016 | Farm bush | Stationary | Waterloo | F | Adult  |
| 190 | SLE/ 390/16 SW | Pool 79 | neg | 0.12 | neg | Northern                 | Bombali  | Sheborah | New York | Pig Farm | Swine | Multiple Crosses | 23.12.2016 | Farm bush | Stationary | Waterloo | F | Adult  |
| 191 | SLE/ 391/16 SW |         |     | 0.09 | neg | Northern                 | Bombali  | Sheborah | New York | Pig Farm | Swine | Multiple Crosses | 23.12.2016 | Farm bush | Stationary | Waterloo | F | Adult  |
| 192 | SLE/ 392/16 SW |         |     | 0.10 | neg | Bombali/ Northern Region | Bombali  | Sheborah | New York | Pig Farm | Swine | Multiple Crosses | 23.12.2016 | Farm bush | Stationary | Waterloo | F | Adult  |
| 193 | SLE/ 393/16 SW |         |     | 0.09 | neg | Bombali/ Northern Region | Pig Farm | Sheborah | New York | Pig Farm | Swine | Multiple Crosses | 24.12.2016 | Community | Stationary | Waterloo | F | Adult  |
| 194 | SLE/ 394/16 SW | Pool 80 | neg | 0.09 | neg | Bombali/ Northern Region | Pig Farm | Sheborah | New York | Pig Farm | Swine | Multiple Crosses | 24.12.2016 | Community | Stationary | Waterloo | F | Adult  |
| 195 | SLE/ 395/16 SW |         |     | 0.13 | neg | Bombali/ Northern Region | Pig Farm | Sheborah | New York | Pig Farm | Swine | Multiple Crosses | 24.12.2016 | Community | Stationary | Waterloo | F | Adult  |
| 196 | SLE/ 396/16 SW |         |     | 0.14 | neg | Bombali/ Northern Region | Pig Farm | Sheborah | New York | Pig Farm | Swine | Multiple Crosses | 24.12.2016 | Community | Stationary | Waterloo | F | Adult  |
| 197 | SLE/ 397/16 SW |         |     | 0.12 | neg | Bombali/ Northern Region | Pig Farm | Sheborah | New York | Pig Farm | Swine | Multiple Crosses | 24.12.2016 | Community | Stationary | Waterloo | F | Adult  |
| 198 | SLE/ 398/16 SW |         |     | 0.09 | neg | Bombali/ Northern Region | Pig Farm | Sheborah | New York | Pig Farm | Swine | Multiple Crosses | 24.12.2016 | Community | Stationary | Waterloo | M | Grower |
| 199 | SLE/ 399/16 SW |         |     | 0.08 | neg | Bombali/ Northern Region | Pig Farm | Sheborah | New York | Pig Farm | Swine | Multiple Crosses | 24.12.2016 | Community | Stationary | Waterloo | F | Grower |
| 200 | SLE/ 400/16 SW |         |     | 0.07 | neg | Bombali/ Northern Region | Pig Farm | Sheborah | New York | Pig Farm | Swine | Multiple Crosses | 24.12.2016 | Community | Stationary | Waterloo | M | Grower |

2017

| Africa No. | Designation FLU | Serum-Pool Nr | Findings (PCR) | DD045 | Finding | Region/ District  | Herd /Flock/ Farm | Animal Species | Breed                   | Habitat Description                | Management System   | Housing, Stable/Pasture, Stationary/Nomadic | History of Migration | Gender Male/Female | Age (Months)     | Type of Specimen |
|------------|-----------------|---------------|----------------|-------|---------|-------------------|-------------------|----------------|-------------------------|------------------------------------|---------------------|---------------------------------------------|----------------------|--------------------|------------------|------------------|
| 1          | SLE/901/17 SW   | Pool 101      | neg            | 0.82  | pos     | Northern region   | Pig farm          | Pig            | West Africa Dwarf       | Community close to Farmbush        | Intensive Care      | Nomadic                                     | Lungi Town           | Male               | Adult (1yr+)     | Serum            |
| 2          | SLE/902/17 SW   |               |                | 0.91  | pos     | Northern region   | Pig farm          | Pig            | West Africa Dwarf       | Community close to Farmbush        | " "                 | Nomadic                                     | Lungi Town           | Female             | Adult (1yr+)     | Serum            |
| 3          | SLE/903/17 SW   |               |                | 0.13  | neg     | Northern region   | Pig farm          | Pig            | West Africa Dwarf       | Community close to Farmbush        | " "                 | Nomadic                                     | Freetown             | Male               | Adult (1yr)      | Serum            |
| 4          | SLE/904/17 SW   |               |                | 0.12  | neg     | Northern region   | Pig farm          | Pig            | West Africa Dwarf       | Community close to Farmbush        | " "                 | Nomadic                                     | Freetown             | Male               | Adult (1yr)      | Serum            |
| 5          | SLE/905/17 SW   | Pool 102      | neg            | 0.17  | neg     | Northern region   | Pig farm          | Pig            | West Africa Dwarf       | Community close to Farmbush        | " "                 | Nomadic                                     | Freetown             | Male               | Adult (1yr)      | Serum            |
| 6          | SLE/906/17 SW   |               |                | 0.11  | neg     | Northern region   | Pig farm          | Pig            | West Africa Dwarf       | Community close to Farmbush        | " "                 | Nomadic                                     | Freetown             | Male               | Adult (2yrs+)    | Serum            |
| 7          | SLE/907/17 SW   |               |                | 0.14  | neg     | Northern region   | Pig farm          | Pig            | West Africa Dwarf       | Community close to Farmbush        | " "                 | Nomadic                                     | Freetown             | Male               | Adult            | Serum            |
| 8          | SLE/908/17 SW   |               |                | 0.12  | neg     | Northern region   | Pig farm          | Pig            | West Africa Dwarf       | Community close to Farmbush        | " "                 | Nomadic                                     | Freetown             | Male               | Grower 6-7Months | Serum            |
| 9          | SLE/909/17 SW   | Pool 103      | neg            | 0.14  | neg     | Northern region   | Pig farm          | Pig            | West Africa Dwarf       | Community close to Farmbush        | " "                 | Nomadic                                     | Freetown             | Female             | Gilt 8months     | Serum            |
| 10         | SLE/910/17 SW   |               |                | 0.11  | neg     | Northern region   | Pig farm          | Pig            | West Africa Dwarf       | Community close to Farmbush        | " "                 | Nomadic                                     | Freetown             | Female             | Gilt 8months     | Serum            |
| 11         | SLE/911/17 SW   |               |                | 0.20  | neg     | Northern/PortLoko | Pig farm          | Pig            | Improved                | Community close tosecondary forest | Free range          | Nomadic                                     | Freetown             | Male               | 7-8 months       | Serum            |
| 12         | SLE/912/17 SW   |               |                | 0.11  | neg     | Northern/PortLoko | Pig farm          | Pig            | Improved                | Community close tosecondary forest | "                   | Nomadic                                     | Freetown             | Female             | 1yrs             | Serum            |
| 13         | SLE/913/17 SW   | Pool 104      | neg            | 0.13  | neg     | Northern/PortLoko | Pig farm          | Pig            | Improved                | Community close tosecondary forest | "                   | Nomadic                                     | Freetown             | Female             | Adult            | Serum            |
| 14         | SLE/914/17 SW   |               |                | 0.13  | neg     | Northern/PortLoko | Pig farm          | Pig            | Improved                | Community close tosecondary forest | "                   | Nomadic                                     | Freetown             | Male               | 1 yr             | Serum            |
| 15         | SLE/915/17 SW   |               |                | 0.17  | neg     | Northern/PortLoko | Pig farm          | Pig            | Improved                | Community close tosecondary forest | "                   | Nomadic                                     | Freetown             | Male               | 3yrs             | Serum            |
| 16         | SLE/916/17 SW   |               |                | 0.09  | neg     | Northern/PortLoko | Pig farm          | Pig            | Improved                | Community close tosecondary forest | "                   | Nomadic                                     | Freetown             | Female             | 2yrs             | Serum            |
| 17         | SLE/917/17 SW   | Pool 105      | neg            | 0.12  | neg     | Northern/PortLoko | Pig farm          | Pig            | Improved                | Community close tosecondary forest | "                   | Nomadic                                     | Freetown             | Male               | 1 yr             | Serum            |
| 18         | SLE/918/17 SW   |               |                | 0.10  | neg     | Northern/PortLoko | Pig farm          | Pig            | Improved                | Community close tosecondary forest | "                   | Nomadic                                     | Freetown             | Female             | 3yrs             | Serum            |
| 19         | SLE/919/17 SW   |               |                | 0.08  | neg     | Northern/PortLoko | Pig farm          | Pig            | West African Dwarf(WAD) | Community close tosecondary forest | "                   | Nomadic                                     | Freetown             | Male               | 8 Months         | Serum            |
| 20         | SLE/920/17 SW   |               |                | 0.11  | neg     | Northern/PortLoko | Pig farm          | Pig            | West African Dwarf(WAD) | Community close tosecondary forest | "                   | Nomadic                                     | Freetown             | Male               | 9 Months         | Serum            |
| 21         | SLE/921/17 SW   | Pool 106      | neg            | 0.11  | neg     | Northern/PortLoko | Pig farm          | Pig            | West African Dwarf(WAD) | Community close tosecondary forest | "                   | Nomadic                                     | Freetown             | Male               | Boar (3 yrs)     | Serum            |
| 22         | SLE/922/17 SW   |               |                | 0.09  | neg     | Northern/PortLoko | Pig farm          | Pig            | West African Dwarf(WAD) | Community close tosecondary forest | "                   | Nomadic                                     | Freetown             | Male               | Boar (3 yrs)     | Serum            |
| 23         | SLE/923/17 SW   |               |                | 0.11  | neg     | Northern/PortLoko | Pig farm          | Pig            | Crosses                 | Community close tosecondary forest | "                   | Nomadic                                     | Freetown             | Male               | Boar (3yrs +)    | Serum            |
| 24         | SLE/924/17 SW   |               |                | 0.18  | neg     | Northern/PortLoko | Pig farm          | Pig            | Crosses                 | Community close tosecondary forest | "                   | Nomadic                                     | Freetown             | Female             | 3 yrs            | Serum            |
| 25         | SLE/925/17 SW   | Pool 107      | neg            | 0.37  | pos     | Northern/PortLoko | Pig farm          | Pig            | Crosses                 | Community close tosecondary forest | "                   | Nomadic                                     | Freetown             | Female             | 3 yrs            | Serum            |
| 26         | SLE/926/17 SW   |               |                | 0.12  | neg     | Northern/PortLoko | Pig farm          | Pig            | Crosses                 | Community close tosecondary forest | "                   | Nomadic                                     | Freetown             | Male               | Boar 4 yrs       | Serum            |
| 27         | SLE/927/17 SW   |               |                | 0.11  | neg     | Northern/PortLoko | Pig farm          | Pig            | Crosses                 | Community close tosecondary forest | "                   | Nomadic                                     | Freetown             | Female             | 3 yrs            | Serum            |
| 28         | SLE/928/17 SW   |               |                | 0.13  | neg     | Northern/PortLoko | Pig farm          | Pig            | Crosses                 | Community close tosecondary forest | "                   | Nomadic                                     | Freetown             | Male               | 3 yrs            | Serum            |
| 29         | SLE/929/17 SW   | Pool 108      | neg            | 0.11  | neg     | Northern/PortLoko | Pig farm          | Pig            | Crosses                 | Community close tosecondary forest | "                   | Nomadic                                     | Freetown             | Female             | 2 yrs            | Serum            |
| 30         | SLE/930/17 SW   |               |                | 0.10  | neg     | Northern/PortLoko | Pig farm          | Pig            | Crosses                 | Community close tosecondary forest | "                   | Nomadic                                     | Freetown             | Male               | 1 yrs +          | Serum            |
| 31         | SLE/931/17 SW   |               |                | 0.10  | neg     | Northern/PortLoko | Pig farm          | Swine          | Large White             | Community close to farm bush       | Intensive Care      | Housing                                     | Freetown             | Male               | 10 Months        | Serum            |
| 32         | SLE/932/17 SW   |               |                | 0.12  | neg     | Northern/PortLoko | Pig farm          | Swine          | Large White             | Community close to farm bush       | Intensive Care      | Housing                                     | Freetown             | Male               | 8 Months         | Serum            |
| 33         | SLE/933/17 SW   | Pool 109      | neg            | 0.12  | neg     | Northern/PortLoko | Pig farm          | Swine          | Large White             | Community close to farm bush       | Intensive Care      | Housing                                     | Freetown             | Male               | 9 Months         | Serum            |
| 34         | SLE/934/17 SW   |               |                | 0.11  | neg     | Northern/PortLoko | Pig farm          | Swine          | Large White             | Community close to farm bush       | Intensive Care      | Housing                                     | Freetown             | Male               | 10 Months        | Serum            |
| 35         | SLE/935/17 SW   |               |                | 0.10  | neg     | Northern/PortLoko | Pig farm          | Swine          | Large White             | Community close to farm bush       | Intensive Care      | Housing                                     | Freetown             | Male               | 8 Months         | Serum            |
| 36         | SLE/936/17 SW   |               |                | 0.12  | neg     | Northern/PortLoko | Pig farm          | Swine          | Large White             | Community close to farm bush       | Intensive Care      | Housing                                     | Freetown             | Male               | 7 Months         | Serum            |
| 37         | SLE/937/17 SW   | Pool 110      | neg            | 0.15  | neg     | Northern/PortLoko | Pig farm          | Swine          | Large White-Duroc       | Community close to farm bush       | Intensive Care      | Housing                                     | Freetown             | Male               | 7 Months         | Serum            |
| 38         | SLE/938/17 SW   |               |                | 0.09  | neg     | Northern/PortLoko | Pig farm          | Swine          | Large White-Duroc       | Community close to farm bush       | Intensive Care      | Housing                                     | Freetown             | Male               | 9 Months         | Serum            |
| 39         | SLE/939/17 SW   |               |                | 0.15  | neg     | Northern/PortLoko | Pig farm          | Swine          | Large White-Duroc       | Community close to farm bush       | Intensive Care      | Housing                                     | Freetown             | Male               | 9 Months         | Serum            |
| 40         | SLE/940/17 SW   |               |                | 0.13  | neg     | Northern/PortLoko | Pig farm          | Swine          | Landrace-WAD            | Community close to farm bush       | Intensive Care      | Housing                                     | Freetown             | Male               | 1 yr +           | Serum            |
| 41         | SLE/941/17 SW   | Pool 111      | neg            | 0.12  | neg     | Northern/PortLoko | Pig farm          | Swine          | Large White-Duroc       | Community close to farm bush       | Intensive Care      | Housing                                     | Freetown             | Male               | 10 Months        | Serum            |
| 42         | SLE/942/17 SW   |               |                | 0.13  | neg     | Northern/PortLoko | Pig farm          | Swine          | Large White-Duroc       | Community close to farm bush       | Intensive Care      | Housing                                     | Lunsar               | Male               | 10 Months        | Serum            |
| 43         | SLE/943/17 SW   |               |                | 0.12  | neg     | Northern/PortLoko | Pig farm          | Swine          | Large White-Duroc       | Community close to farm bush       | Intensive Care      | Housing                                     | Lunsar               | Male               | 1yr+             | Serum            |
| 44         | SLE/944/17 SW   |               |                | 0.12  | neg     | Northern/PortLoko | Pig farm          | Swine          | Large White-Duroc       | Community close to farm bush       | Intensive Care      | Housing                                     | Lunsar               | Male               | 1yr+             | Serum            |
| 45         | SLE/945/17 SW   | Pool 112      | neg            | 0.99  | pos     | Northern/PortLoko | Pig farm          | Swine          | Large White-Duroc       | Community close to farm bush       | Intensive Care      | Housing                                     | Lunsar               | Male               | 1yr+             | Serum            |
| 46         | SLE/946/17 SW   |               |                | 0.13  | neg     | Northern/PortLoko | Pig farm          | Swine          | Large White-Duroc       | Community close to farm bush       | Intensive Care      | Housing                                     | Lunsar               | Male               | 1yr+             | Serum            |
| 47         | SLE/947/17 SW   |               |                | 0.11  | neg     | Northern/PortLoko | Pig farm          | Swine          | Large White-Duroc       | Community close to farm bush       | Intensive Care      | Housing                                     | Lunsar               | Male               | 1yr+             | Serum            |
| 48         | SLE/948/17 SW   |               |                | 0.23  | neg     | Northern/PortLoko | Pig farm          | Swine          | Large White-WAD         | Community close to farm bush       | Intensive Care      | Housing                                     | Lunsar               | Male               | 1yr+             | Serum            |
| 49         | SLE/949/17 SW   | Pool 113      | neg            | 0.16  | neg     | Northern/PortLoko | Pig farm          | Swine          | Large White-WAD         | Community close to farm bush       | Intensive Care      | Housing                                     | Lunsar               | Male               | 8 Months         | Serum            |
| 50         | SLE/950/17 SW   |               |                | 0.11  | neg     | Northern/PortLoko | Pig farm          | Swine          | Large White-WAD         | Community close to farm bush       | Intensive Care      | Housing                                     | Lunsar               | Male               | 8 Months         | Serum            |
| 51         | SLE/951/17 SW   |               |                | 0.09  | neg     | Northern/PortLoko | Pig farm          | Swine          | Large White-WAD         | Community close to farm bush       | Intensive Care      | Housing                                     | Lungi Town           | Male               | 8 Months         | Serum            |
| 52         | SLE/952/17 SW   |               |                | 0.09  | neg     | Northern/PortLoko | Pig farm          | Swine          | Large White-WAD         | Community close to farm bush       | Intensive Care      | Housing                                     | Lungi Town           | Male               | 8Months          | Serum            |
| 53         | SLE/953/17 SW   | Pool 114      | neg            | 0.16  | neg     | Northern/PortLoko | Pig farm          | Swine          | Large White-WAD         | Community close to farm bush       | Intensive Care      | Housing                                     | Lungi Town           | Female             | 6-7 Months       | Serum            |
| 54         | SLE/954/17 SW   |               |                | 0.13  | neg     | Northern/PortLoko | Pig farm          | Swine          | Large White-WAD         | Community close to farm bush       | Intensive Care      | Housing                                     | Lungi Town           | Male               | 10 Months        | Serum            |
| 55         | SLE/955/17 SW   |               |                | 0.11  | neg     | Northern/PortLoko | Pig farm          | Swine          | Large White-WAD         | Community close to farm bush       | Intensive Care      | Housing                                     | Lungi Town           | Female             | 2 yrs +          | Serum            |
| 56         | SLE/956/17 SW   |               |                | 0.11  | neg     | Northern/PortLoko | Pig farm          | Swine          | Large White-WAD         | Community close to farm bush       | Intensive Care      | Housing                                     | Lungi Town           | Male               | 1Yr +            | Serum            |
| 57         | SLE/957/17 SW   | Pool 115      | neg            | 0.14  | neg     | Northern/PortLoko | Pig farm          | Swine          | Large White-Duroc       | Community close to farm bush       | Intensive Care      | Housing                                     | Lungi Town           | Male               | 1 yr +           | Serum            |
| 58         | SLE/958/17 SW   |               |                | 0.12  | neg     | Northern/PortLoko | Pig farm          | Swine          | Large White-Duroc       | Community close to farm bush       | Intensive Care      | Housing                                     | Lungi Town           | Male               | 1yr+             | Serum            |
| 59         | SLE/959/17 SW   |               |                | 0.10  | neg     | Northern/PortLoko | Pig farm          | Swine          | Large White-Duroc       | Community close to farm bush       | Intensive Care      | Housing                                     | Lungi Town           | Female             | Gilt 5-6Months   | Serum            |
| 60         | SLE/960/17 SW   |               |                | 0.10  | neg     | Northern/PortLoko | Pig farm          | Swine          | Large White-Duroc       | Community close to farm bush       | Intensive Care      | Housing                                     | Lungi Town           | Female             | Gilt 5-6Months   | Serum            |
| 61         | SLE/961/17 SW   | Pool 116      | neg            | 0.08  | neg     | Northern/PortLoko | Pig farm          | Swine          | Large White-Duroc       | Community close to farm bush       | Intensive Care      | Housing                                     | Lungi Town           | Male               | Grower           | Serum            |
| 62         | SLE/962/17 SW   |               |                | 0.09  | neg     | Northern/PortLoko | Pig farm          | Swine          | Large White-Duroc       | Community close to farm bush       | Intensive Care      | Housing                                     | Lungi Town           | Female             | Gilt 5-6Months   | Serum            |
| 63         | SLE/963/17 SW   |               |                | 0.11  | neg     | Northern/PortLoko | Pig farm          | Swine          | Large White-Duroc       | Community close to farm bush       | Intensive Care      | Housing                                     | Lungi Town           | Female             | Gilt 5-6Months   | Serum            |
| 64         | SLE/964/17 SW   |               |                | 0.13  | neg     | Northern/PortLoko | Pig farm          | Swine          | Large White-Duroc       | Community close to farm bush       | Intensive Care      | Housing                                     | Lungi Town           | Female             | Gilt 5-6Months   | Serum            |
| 65         | SLE/965/17 SW   | Pool 117      | neg            | 0.11  | neg     | Northern/PortLoko | Pig farm          | Swine          | Large White-Duroc       | Community close to farm bush       | Intensive Care      | Housing                                     | Lungi Town           | Female             | Gilt 5-6Months   | Serum            |
| 66         | SLE/966/17 SW   |               |                | 0.09  | neg     | Northern/PortLoko | Pig farm          | Swine          | Large White-Duroc       | Community close to farm bush       | Intensive Care      | Housing                                     | Lungi Town           | Male               | 1 yr +           | Serum            |
| 67         | SLE/967/17 SW   |               |                | 0.08  | neg     | Northern/PortLoko | Pig farm          | Swine          | Large White-Duroc       | Community close to farm bush       | Intensive Care      | Housing                                     | Lungi Town           | Female             | 2 yrs +          | Serum            |
| 68         | SLE/968/17 SW   | Pool 118      | neg            | 0.09  | neg     | Northern/PortLoko | Pig farm          | Swine          | Large White-Duroc       | Community close to farm bush       | Intensive Care      | Housing                                     | Lungi Town           | Male               | 1 yr +           | Serum            |
| 69         | SLE/969/17 SW   |               |                | 0.09  | neg     | Northern/PortLoko | Pig farm          | Swine          | Large White-Duroc       | Community close to farm bush       | Intensive Care      | Housing                                     | Lungi Town           | Male               | 1 yr +           | Serum            |
| 70         | SLE/970/17 SW   |               |                | 0.09  | neg     | Northern/PortLoko | Pig farm          | Swine          | Large White-Duroc       | Community close to farm bush       | Intensive Care      | Housing                                     | Lungi Town           | Female             | 3 yrs+           | Serum            |
| 71         | SLE/971/17 SW   | Pool 119      | neg            | 0.11  | neg     | Northern/PortLoko | Pig farm          | Swine          | West Africa Dwarf       | Community close to farm bush       | Semi Intensive Care | Nomadic                                     | Lungi Town           | Female             | 6 Months         | Serum            |
| 72         | SLE/972/17 SW   |               |                | 0.12  | neg     | Northern/PortLoko | Pig farm          | Swine          | West Africa Dwarf       | Community close to farm bush       | "                   | Nomadic                                     | Lungi Town           | Male               | 12Months         | Serum            |
| 73         | SLE/973/17 SW   |               |                | 0.11  | neg     | Northern/PortLoko | Pig farm          | Swine          | West Africa Dwarf       | Community close to farm bush       | "                   | Nomadic                                     | Lungi Town           | Male               | 2yrs +           | Serum            |
| 74         | SLE/974/17 SW   |               |                | 0.10  | neg     | Northern/PortLoko | Pig farm          | Swine          | West Africa Dwarf       | Community close to farm bush       | "                   | Nomadic                                     | Lungi Town           | Female             | 3 yrs +          | Serum            |
| 75         | SLE/975/17 SW   |               |                | 0.11  | neg     | Northern/PortLoko | Pig farm          | Swine          | West Africa Dwarf       | Community close to farm bush       | "                   | Nomadic                                     | Lungi Town           | Female             | 3 yrs +          | Serum            |
| 76         | SLE/976/17 SW   |               |                | 0.10  | neg     | Northern/PortLoko | Pig farm          | Swine          | West Africa Dwarf       | Community close to farm bush       | "                   | Nomadic                                     | Portloko Town        | Female             | 6-8 Months       | Serum            |



|     |                |          |     |      |      |                    |          |       |                     |                              |                     |         |                |        |                 |       |
|-----|----------------|----------|-----|------|------|--------------------|----------|-------|---------------------|------------------------------|---------------------|---------|----------------|--------|-----------------|-------|
| 77  | SLE/8717/17 SW | Pool 116 | neg | 0.09 | neg  | Northern/Port/Loko | Pig farm | Swine | West Africa Duwarf  | Community close to farm bush | *                   | Nomadic | Portloto Town  | Female | 6 Months        | Serum |
| 78  | SLE/8787/17 SW |          | neg | 0.09 | neg  | Northern/Portloto  | Pig farm | Swine | West Africa Duwarf  | Community close to farm bush | *                   | Nomadic | Portloto Town  | Female | 1 yr            | Serum |
| 79  | SLE/8797/17 SW |          | neg | 0.11 | neg  | Northern/Portloto  | Pig farm | Swine | West Africa Duwarf  | Community close to farm bush | *                   | Nomadic | Portloto Town  | Male   | 2 yrs +         | Serum |
| 80  | SLE/8807/17 SW | Pool 117 | neg | 0.12 | neg  | Northern/Portloto  | Pig farm | Swine | West African Duwarf | Community close to farm bush | Semi Intensive Care | Nomadic | Lunsar town    | Male   | Adult (1yr)     | Serum |
| 81  | SLE/8817/17 SW |          | neg | 0.11 | neg  | Northern/Portloto  | Pig farm | Swine | West African Duwarf | Community close to farm bush | Semi Intensive Care | Nomadic | Lunsar town    | Female | 1n yr +         | Serum |
| 82  | SLE/8827/17 SW |          | neg | 0.13 | neg  | Northern/Portloto  | Pig farm | Swine | West African Duwarf | Community close to farm bush | Semi Intensive Care | Nomadic | Lunsar town    | Male   | 8 Months        | Serum |
| 83  | SLE/8837/17 SW | Pool 118 | neg | 0.12 | neg  | Northern/Portloto  | Pig farm | Swine | West African Duwarf | Community close to farm bush | Semi Intensive Care | Nomadic | Lunsar town    | Male   | 8 Months        | Serum |
| 84  | SLE/8847/17 SW |          | neg | 0.12 | neg  | Northern/Portloto  | Pig farm | Swine | West African Duwarf | Community close to farm bush | Semi Intensive Care | Nomadic | Lunsar town    | Female | Gift (7 Months) | Serum |
| 85  | SLE/8857/17 SW |          | neg | 0.10 | neg  | Northern/Portloto  | Pig farm | Swine | West African Duwarf | Community close to farm bush | Semi Intensive Care | Nomadic | Lunsar town    | Male   | 7 Months        | Serum |
| 86  | SLE/8867/17 SW | Pool 119 | neg | 0.10 | neg  | Northern/Portloto  | Pig farm | Swine | West African Duwarf | Community close to farm bush | Semi Intensive Care | Nomadic | Lunsar town    | Male   | Adult (1yr +)   | Serum |
| 87  | SLE/8877/17 SW |          | neg | 0.14 | neg  | Northern/Portloto  | Pig farm | Swine | West African Duwarf | Community close to farm bush | Semi Intensive Care | Nomadic | Lunsar town    | Female | 2 yrs +         | Serum |
| 88  | SLE/8887/17 SW |          | neg | 0.14 | neg  | Northern/Portloto  | Pig farm | Swine | West African Duwarf | Community close to farm bush | Semi Intensive Care | Nomadic | Lunsar town    | Female | 2 yrs +         | Serum |
| 89  | SLE/8897/17 SW | Pool 120 | neg | 0.26 | neg  | Northern/Portloto  | Pig farm | Swine | West African Duwarf | Community close to farm bush | Semi Intensive Care | Nomadic | Lunsar town    | Female | 2 yrs +         | Serum |
| 90  | SLE/8907/17 SW |          | neg | 0.12 | neg  | Northern/Portloto  | Pig farm | Swine | West African Duwarf | Community close to farm bush | Semi Intensive Care | Nomadic | Lunsar town    | Female | 3 yrs +         | Serum |
| 91  | SLE/8917/17 SW |          | neg | 0.27 | neg  | Northern/Portloto  | Pig farm | Swine | West African Duwarf | Community close to farm bush | Semi Intensive Care | Nomadic | Lunsar town    | Female | 10 Months       | Serum |
| 92  | SLE/8927/17 SW | Pool 121 | neg | 0.82 | pos  | Northern/Portloto  | Pig farm | Swine | West African Duwarf | Community close to farm bush | Semi Intensive Care | Nomadic | Lunsar town    | Female | 3 yrs           | Serum |
| 93  | SLE/8937/17 SW |          | neg | 0.34 | pos  | Northern/Portloto  | Pig farm | Swine | West African Duwarf | Community close to farm bush | Semi Intensive Care | Nomadic | Lunsar town    | Female | 3 yrs           | Serum |
| 94  | SLE/8947/17 SW |          | neg | 0.24 | neg  | Northern/Portloto  | Pig farm | Swine | West African Duwarf | Community close to farm bush | Semi Intensive Care | Nomadic | Lunsar town    | Male   | 6 Months        | Serum |
| 95  | SLE/8957/17 SW | Pool 122 | neg | 0.12 | neg  | Northern/Portloto  | Pig farm | Swine | West African Duwarf | Community close to farm bush | Semi Intensive Care | Nomadic | Lunsar town    | Female | 1 yr +          | Serum |
| 96  | SLE/8967/17 SW |          | neg | 0.88 | pos  | Northern/Portloto  | Pig farm | Swine | West African Duwarf | Community close to farm bush | Semi Intensive Care | Nomadic | Lunsar town    | Female | 1 yr +          | Serum |
| 97  | SLE/8977/17 SW |          | neg | 0.28 | inki | Northern/Bombali   | Pig farm | Swine | West African Duwarf | Community close to farm bush | Semi Intensive Care | Nomadic | Kamaranka Town | Male   | 6 Months        | Serum |
| 98  | SLE/8987/17 SW | Pool 123 | neg | 0.22 | neg  | Northern/Bombali   | Pig farm | Swine | West African Duwarf | Community close to farm bush | Semi Intensive Care | Nomadic | Kamaranka Town | Male   | 6 Months        | Serum |
| 99  | SLE/8997/17 SW |          | neg | 0.44 | neg  | Northern/Bombali   | Pig farm | Swine | West African Duwarf | Community close to farm bush | Semi Intensive Care | Nomadic | Kamaranka Town | Female | 6 Months        | Serum |
| 100 | SLE/9007/17 SW |          | neg | 0.22 | neg  | Northern/Bombali   | Pig farm | Swine | West African Duwarf | Community close to farm bush | Semi Intensive Care | Nomadic | Kamaranka Town | Female | 6 Months        | Serum |
| 101 | SLE/9001/17 SW | Pool 124 | neg | 0.12 | neg  | Northern/Bombali   | Pig farm | Swine | West African Duwarf | Community close to farm bush | Semi Intensive Care | Nomadic | Kamaranka Town | Female | 2 yrs +         | Serum |
| 102 | SLE/9002/17 SW |          | neg | 0.14 | neg  | Northern/Bombali   | Pig farm | Swine | West African Duwarf | Community close to farm bush | Semi Intensive Care | Nomadic | Kamaranka Town | Female | 1 yr +          | Serum |
| 103 | SLE/9003/17 SW |          | neg | 0.13 | neg  | Northern/Bombali   | Pig farm | Swine | West African Duwarf | Community close to farm bush | Semi Intensive Care | Nomadic | Kamaranka Town | Male   | 1 yr +          | Serum |
| 104 | SLE/9004/17 SW | Pool 125 | neg | 0.14 | neg  | Northern/Bombali   | Pig farm | Swine | West African Duwarf | Community close to farm bush | Semi Intensive Care | Nomadic | Kamaranka Town | Male   | 1 yr +          | Serum |
| 105 | SLE/9005/17 SW |          | neg | 0.19 | neg  | Northern/Bombali   | Pig farm | Swine | West African Duwarf | Community close to farm bush | Semi Intensive Care | Nomadic | Kamaranka Town | Female | 1 yr +          | Serum |
| 106 | SLE/9006/17 SW |          | neg | 0.17 | neg  | Northern/Bombali   | Pig farm | Swine | West African Duwarf | Community close to farm bush | Semi Intensive Care | Nomadic | Kamaranka Town | Female | 1 yr +          | Serum |
| 107 | SLE/9007/17 SW | Pool 126 | neg | 0.17 | neg  | Northern/Bombali   | Pig farm | Swine | West African Duwarf | Community close to farm bush | Semi Intensive Care | Nomadic | Freetown       | Female | 8 Months        | Serum |
| 108 | SLE/9008/17 SW |          | neg | 0.19 | neg  | Northern/Bombali   | Pig farm | Swine | West African Duwarf | Community close to farm bush | Semi Intensive Care | Nomadic | Freetown       | Male   | 8 Months        | Serum |
| 109 | SLE/9009/17 SW |          | neg | 0.21 | neg  | Northern/Bombali   | Pig farm | Swine | West African Duwarf | Community close to farm bush | Semi Intensive Care | Nomadic | Freetown       | Male   | 8 Months        | Serum |
| 110 | SLE/9010/17 SW | Pool 127 | neg | 0.13 | neg  | Northern/Bombali   | Pig farm | Swine | West African Duwarf | Community close to farm bush | Semi Intensive Care | Nomadic | Freetown       | Male   | 8 Months        | Serum |
| 111 | SLE/9011/17 SW |          | neg | 0.15 | neg  | Northern/Bombali   | Pig farm | Swine | West African Duwarf | Community close to farm bush | Semi Intensive Care | Nomadic | Freetown       | Female | 8 Months        | Serum |
| 112 | SLE/9012/17 SW |          | neg | 0.25 | neg  | Northern/Bombali   | Pig farm | Swine | West African Duwarf | Community close to farm bush | Semi Intensive Care | Nomadic | Freetown       | Female | 8 Months +      | Serum |
| 113 | SLE/9013/17 SW | Pool 128 | neg | 0.15 | neg  | Northern/Bombali   | Pig farm | Swine | West African Duwarf | Community close to farm bush | Semi Intensive Care | Nomadic | Freetown       | Female | 6 Months +      | Serum |
| 114 | SLE/9014/17 SW |          | neg | 0.13 | neg  | Northern/Bombali   | Pig farm | Swine | West African Duwarf | Community close to farm bush | Semi Intensive Care | Nomadic | Freetown       | Female | 3yrs            | Serum |
| 115 | SLE/9015/17 SW |          | neg | 0.20 | neg  | Northern/Bombali   | Pig farm | Swine | West African Duwarf | Community close to farm bush | Semi Intensive Care | Nomadic | Freetown       | Female | 2 yrs +         | Serum |
| 116 | SLE/9016/17 SW | Pool 129 | neg | 0.19 | neg  | Northern/Bombali   | Pig farm | Swine | West African Duwarf | Community close to farm bush | Semi Intensive Care | Nomadic | Freetown       | Female | 2 yrs +         | Serum |
| 117 | SLE/9017/17 SW |          | neg | 0.17 | neg  | Northern/Bombali   | Pig farm | Swine | Large white         | Community close to farm bush | Semi Intensive Care | Nomadic | Freetown       | Female | 1 yr +          | Serum |
| 118 | SLE/9018/17 SW |          | neg | 0.19 | neg  | Northern/Bombali   | Pig farm | Swine | West African Duwarf | Community close to farm bush | Semi Intensive Care | Nomadic | Freetown       | Male   | 8 Months        | Serum |
| 119 | SLE/9019/17 SW | Pool 130 | neg | 0.12 | neg  | Northern/Bombali   | Pig farm | Swine | West African Duwarf | Community close to farm bush | Semi Intensive Care | Nomadic | Freetown       | Male   | 8 Months        | Serum |
| 120 | SLE/9020/17 SW |          | neg | 0.16 | neg  | Northern/Bombali   | Pig farm | Swine | West African Duwarf | Community close to farm bush | Semi Intensive Care | Nomadic | Freetown       | Female | 1 yr +          | Serum |
| 121 | SLE/9021/17 SW |          | neg | 0.11 | neg  | Northern/Bombali   | Pig farm | Swine | Large white         | Community close to farm bush | Semi Intensive Care | Nomadic | Freetown       | Male   | 8 Months        | Serum |
| 122 | SLE/9022/17 SW | Pool 131 | neg | 0.12 | neg  | Northern/Bombali   | Pig farm | Swine | West African Duwarf | Community close to farm bush | Semi Intensive Care | Nomadic | Freetown       | Female | 8 Months        | Serum |
| 123 | SLE/9023/17 SW |          | neg | 0.16 | neg  | Northern/Bombali   | Pig farm | Swine | West African Duwarf | Community close to farm bush | Semi Intensive Care | Nomadic | Freetown       | Female | 1 yr +          | Serum |
| 124 | SLE/9024/17 SW |          | neg | 0.13 | neg  | Northern/Bombali   | Pig farm | Swine | West African Duwarf | Community close to farm bush | Semi Intensive Care | Nomadic | Freetown       | Male   | 8 Months        | Serum |
| 125 | SLE/9025/17 SW | Pool 132 | neg | 0.14 | neg  | Northern/Bombali   | Pig farm | Swine | West African Duwarf | Community close to farm bush | Semi Intensive Care | Nomadic | Freetown       | Female | 3 yrs +         | Serum |
| 126 | SLE/9026/17 SW |          | neg | 0.15 | neg  | Northern/Bombali   | Pig farm | Swine | West African Duwarf | Community close to farm bush | Semi Intensive Care | Nomadic | Freetown       | Male   | 2 yrs +         | Serum |
| 127 | SLE/9027/17 SW |          | neg | 0.11 | neg  | Northern/Bombali   | Pig farm | Swine | West African Duwarf | Community close to farm bush | Semi Intensive Care | Nomadic | Freetown       | Female | 1 yr +          | Serum |
| 128 | SLE/9028/17 SW | Pool 133 | neg | 0.19 | neg  | Northern/Bombali   | Pig farm | Swine | West African Duwarf | Community close to farm bush | Semi Intensive Care | Nomadic | Freetown       | Male   | 10 Months       | Serum |
| 129 | SLE/9029/17 SW |          | neg | 0.11 | neg  | Northern/Bombali   | Pig farm | Swine | Large white         | Community close to farm bush | Semi Intensive Care | Nomadic | Freetown       | Male   | 10 Months       | Serum |
| 130 | SLE/9030/17 SW |          | neg | 0.13 | neg  | Northern/Bombali   | Pig farm | Swine | West African Duwarf | Community close to farm bush | Semi Intensive Care | Nomadic | Freetown       | Female | 2 yrs +         | Serum |
| 131 | SLE/9031/17 SW | Pool 134 | neg | 0.15 | neg  | Northern/Bombali   | Pig farm | Swine | West African Duwarf | Community close to farm bush | Semi Intensive Care | Nomadic | Freetown       | Female | 8 Months        | Serum |
| 132 | SLE/9032/17 SW |          | neg | 0.16 | neg  | Northern/Bombali   | Pig farm | Swine | West African Duwarf | Community close to farm bush | Semi Intensive Care | Nomadic | Freetown       | Female | 5 yrs           | Serum |
| 133 | SLE/9033/17 SW |          | neg | 0.11 | neg  | Northern/Bombali   | Pig farm | Swine | West African Duwarf | Community close to farm bush | Semi Intensive Care | Nomadic | Freetown       | Male   | 8 Months        | Serum |
| 134 | SLE/9034/17 SW | Pool 135 | neg | 0.10 | neg  | Northern/Bombali   | Pig farm | Swine | West African Duwarf | Community close to farm bush | Semi Intensive Care | Nomadic | Freetown       | Male   | 8 Months        | Serum |
| 135 | SLE/9035/17 SW |          | neg | 0.11 | neg  | Northern/Bombali   | Pig farm | Swine | West African Duwarf | Community close to farm bush | Semi Intensive Care | Nomadic | Freetown       | Female | 7 Months        | Serum |
| 136 | SLE/9036/17 SW |          | neg | 0.12 | neg  | Northern/Bombali   | Pig farm | Swine | West African Duwarf | Community close to farm bush | Semi Intensive Care | Nomadic | Freetown       | Male   | 7 Months        | Serum |
| 137 | SLE/9037/17 SW | Pool 136 | neg | 0.09 | neg  | Northern/Bombali   | Pig farm | Swine | West African Duwarf | Community close to farm bush | Semi Intensive Care | Nomadic | Freetown       | Male   | 7 Months        | Serum |
| 138 | SLE/9038/17 SW |          | neg | 0.19 | neg  | Northern/Bombali   | Pig farm | Swine | West African Duwarf | Community close to farm bush | Semi Intensive Care | Nomadic | Teko Village   | Female | 7 Months        | Serum |
| 139 | SLE/9039/17 SW |          | neg | 0.16 | neg  | Northern/Bombali   | Pig farm | Swine | West African Duwarf | Community close to farm bush | Semi Intensive Care | Nomadic | Teko Village   | Female | 7 Months        | Serum |
| 140 | SLE/9040/17 SW | Pool 137 | neg | 0.10 | neg  | Northern/Bombali   | Pig farm | Swine | West African Duwarf | Community close to farm bush | Semi Intensive Care | Nomadic | Teko Village   | Male   | 7 Months        | Serum |
| 141 | SLE/9041/17 SW |          | neg | 0.09 | neg  | Northern/Bombali   | Pig farm | Swine | West African Duwarf | Community close to farm bush | Semi Intensive Care | Nomadic | Teko Village   | Male   | 7 Months        | Serum |
| 142 | SLE/9042/17 SW |          | neg | 0.12 | neg  | Northern/Bombali   | Pig farm | Swine | West African Duwarf | Community close to farm bush | Semi Intensive Care | Nomadic | Teko Village   | Female | 7 Months        | Serum |
| 143 | SLE/9043/17 SW | Pool 138 | neg | 0.10 | neg  | Northern/Bombali   | Pig farm | Swine | West African Duwarf | Community close to farm bush | Semi Intensive Care | Nomadic | Teko Village   | Male   | 7 Months        | Serum |
| 144 | SLE/9044/17 SW |          | neg | 0.14 | neg  | Northern/Bombali   | Pig farm | Swine | West African Duwarf | Community close to farm bush | Semi Intensive Care | Nomadic | Teko Village   | Female | 9 Months        | Serum |
| 145 | SLE/9045/17 SW |          | neg | 0.09 | neg  | Northern/Bombali   | Pig farm | Swine | West African Duwarf | Community close to farm bush | Semi Intensive Care | Nomadic | Teko Village   | Male   | 2 yrs           | Serum |
| 146 | SLE/9046/17 SW | Pool 139 | neg | 0.16 | neg  | Northern/Bombali   | Pig farm | Swine | West African Duwarf | Community close to farm bush | Semi Intensive Care | Nomadic | Teko Village   | Female | 3 yrs           | Serum |
| 147 | SLE/9047/17 SW |          | neg | 0.11 | neg  | Northern/Bombali   | Pig farm | Swine | Durac Largewhite    | Community close to farm bush | Semi Intensive Care | Nomadic | Teko Village   | Female | 2 yrs           | Serum |
| 148 | SLE/9048/17 SW |          | neg | 0.16 | neg  | Northern/Bombali   | Pig farm | Swine | Durac Largewhite    | Community close to farm bush | Semi Intensive Care | Nomadic | Teko Village   | Male   | 10 Months       | Serum |
| 149 | SLE/9049/17 SW | Pool 140 | neg | 0.13 | neg  | Northern/Bombali   | Pig farm | Swine | Durac Largewhite    | Community close to farm bush | Semi Intensive Care | Nomadic | Teko Village   | Male   | 2 yrs           | Serum |
| 150 | SLE/9050/17 SW |          | neg | 0.09 | neg  | Northern/Bombali   | Pig farm | Swine | Durac Largewhite    | Community close to farm bush | Semi Intensive Care | Nomadic | Teko Village   | Female | 1 yr            | Serum |
| 151 | SLE/9051/17 SW |          | neg | 0.32 | pos  | Northern/Bombali   | Pig farm | Swine | Durac Largewhite    | Community close to farm bush | Semi Intensive Care | Nomadic | Makenti Town   | Male   | 1 yr +          | Serum |
| 152 | SLE/9052/17 SW | Pool 141 | neg | 0.15 | neg  | Northern/Bombali   | Pig farm | Swine | West African Duwarf | Community close to farm bush | Semi Intensive Care | Nomadic | Makenti Town   | Female | 1 yr +          | Serum |
| 153 | SLE/9053/17 SW |          | neg | 0.11 | neg  | Northern/Bombali   | Pig farm | Swine | West African Duwarf | Community close to farm bush | Semi Intensive Care | Nomadic | Makenti Town   | Female | 8 Months        | Serum |
| 154 | SLE/9054/17 SW |          | neg | 0.15 | neg  | Northern/Bombali   | Pig farm | Swine | West African Duwarf | Community close to farm bush | Semi Intensive Care | Nomadic | Makenti Town   | Female | 8 Months        | Serum |
| 155 | SLE/9055/17 SW | Pool 142 | neg | 0.12 | neg  | Northern/Bombali   | Pig farm | Swine | West African Duwarf | Community close to farm bush | Semi Intensive Care | Nomadic | Makenti Town   | Female | 8 Months        | Serum |
| 156 | SLE/9056/17 SW |          | neg | 0.13 | neg  | Northern/Bombali   | Pig farm | Swine | West African Duwarf | Community close to farm bush | Semi Intensive Care | Nomadic | Makenti Town   | Male   | 8 Months        | Serum |
| 157 | SLE/9057/17 SW |          | neg | 0.12 | neg  | Northern/Bombali   | Pig farm | Swine | West African Duwarf | Community close to farm bush | Semi Intensive Care | Nomadic | Makenti Town   | Male   | 3 yrs +         | Serum |
| 158 | SLE/9058/17 SW | Pool 143 | neg | 0.14 | neg  | Northern/Bombali   | Pig farm | Swine | West African Duwarf | Community close to farm bush | Semi Intensive Care | Nomadic | Makenti Town   | Female | 2 yrs           | Serum |
| 159 | SLE/9059/17 SW |          | neg | 0.10 | neg  | Northern/Bombali   | Pig farm | Swine | West African Duwarf | Community close to farm bush | Semi Intensive Care | Nomadic | Makenti Town   | Female | Gift            | Serum |
| 160 | SLE/9060/17 SW |          | neg | 0.15 | neg  | Northern/Bombali   | Pig farm | Swine | West African Duwarf | Community close to farm bush | Semi Intensive Care | Nomadic | Makenti Town   | Female | Gift            | Serum |
| 161 | SLE/9061/17 SW | Pool 144 | neg | 0.10 | neg  | Northern/Bombali   | Pig farm | Swine | West African Duwarf | Community close to farm bush | Semi Intensive Care | Nomadic | Makenti Town   | Female | Gift            | Serum |
| 162 | SLE/9062/17 SW |          | neg | 0.13 | neg  | Northern/Bombali   | Pig farm | Swine | West African Duwarf | Community close to farm bush | Free range          | Nomadic | Makenti Town   | Female | Gift            | Serum |
| 163 | SLE/9063/17 SW |          | neg | 0.14 | neg  | Northern/Bombali   | Pig farm | Swine | West African Duwarf | Community close to farm bush | Free range          | Nomadic | Makenti Town   | Female | Gift            | Serum |
| 164 | SLE/9064/17 SW | Pool 145 | neg | 0.11 | neg  | Northern/Bombali   | Pig farm | Swine | West African Duwarf | Community close to farm bush | Free range          | Nomadic | Makenti Town   | Male   | Grower          | Serum |
| 165 | SLE/9065/17 SW |          | neg | 0.14 | neg  | Northern/Bombali   | Pig farm | Swine | West African Duwarf | Community close to farm bush | Free range          | Nomadic | Makenti Town   | Male   | Grower          | Serum |
|     |                |          |     |      |      |                    |          |       |                     |                              |                     |         |                |        |                 |       |

|     |                |          |     |      |     |                  |          |       |                     |                              |                     |         |              |        |        |       |
|-----|----------------|----------|-----|------|-----|------------------|----------|-------|---------------------|------------------------------|---------------------|---------|--------------|--------|--------|-------|
| 174 | SLE/1074/17 SW | Pool 136 | neg | 0.09 | neg | Northern/Bombali | Pig farm | Swine | West African Duwarf | Community close to farm bush | Free range          | Nomadic | Congo Town   | Male   | Grower | Serum |
| 175 | SLE/1075/17 SW |          |     | 0.12 | neg | Northern/Bombali | Pig farm | Swine | West African Duwarf | Community close to farm bush | Free range          | Nomadic | Congo Town   | Male   | Grower | Serum |
| 176 | SLE/1076/17 SW |          |     | 0.08 | neg | Northern/Bombali | Pig farm | Swine | West African Duwarf | Community close to farm bush | Free range          | Nomadic | Congo Town   | Male   | Grower | Serum |
| 177 | SLE/1077/17 SW |          |     | 0.10 | neg | Northern/Bombali | Pig farm | Swine | West African Duwarf | Community close to farm bush | Free range          | Nomadic | Congo Town   | Male   | Grower | Serum |
| 178 | SLE/1078/17 SW | Pool 137 | neg | 0.15 | neg | Northern/Bombali | Pig farm | Swine | West African Duwarf | Community close to farm bush | Semi Intensive Care | Nomadic | Congo Town   | Male   | Grower | Serum |
| 179 | SLE/1079/17 SW |          |     | 0.11 | neg | Northern/Bombali | Pig farm | Swine | West African Duwarf | Community close to farm bush | Semi Intensive Care | Nomadic | Congo Town   | Male   | Grower | Serum |
| 180 | SLE/1080/17 SW |          |     | 0.12 | neg | Northern/Bombali | Pig farm | Swine | West African Duwarf | Community close to farm bush | Semi Intensive Care | Nomadic | Congo Town   | Male   | Grower | Serum |
| 181 | SLE/1081/17 SW |          |     | 0.17 | neg | Northern/Bombali | Pig farm | Swine | West African Duwarf | Community close to farm bush | Semi Intensive Care | Nomadic | Congo Town   | Male   | Grower | Serum |
| 182 | SLE/1082/17 SW | Pool 138 | neg | 0.12 | neg | Northern/Bombali | Pig farm | Swine | West African Duwarf | Community close to farm bush | Semi Intensive Care | Nomadic | Congo Town   | Female | Adult  | Serum |
| 183 | SLE/1083/17 SW |          |     | 0.14 | neg | Northern/Bombali | Pig farm | Swine | West African Duwarf | Community close to farm bush | Semi Intensive Care | Nomadic | Congo Town   | Male   | Boar   | Serum |
| 184 | SLE/1084/17 SW |          |     | 0.14 | neg | Northern/Bombali | Pig farm | Swine | West African Duwarf | Community close to farm bush | Semi Intensive Care | Nomadic | Congo Town   | Male   | Boar   | Serum |
| 185 | SLE/1085/17 SW |          |     | 0.27 | neg | Northern/Bombali | Pig farm | Swine | West African Duwarf | Community close to farm bush | Semi Intensive Care | Nomadic | Congo Town   | Male   | Grower | Serum |
| 186 | SLE/1086/17 SW | Pool 139 | neg | 0.11 | neg | Northern/Bombali | Pig farm | Swine | West African Duwarf | Community close to farm bush | Semi Intensive Care | Nomadic | Teko village | Male   | Grower | Serum |
| 187 | SLE/1087/17 SW |          |     | 0.13 | neg | Northern/Bombali | Pig farm | Swine | West African Duwarf | Community close to farm bush | Semi Intensive Care | Nomadic | Teko village | Male   | Grower | Serum |
| 188 | SLE/1088/17 SW |          |     | 0.13 | neg | Northern/Bombali | Pig farm | Swine | West African Duwarf | Community close to farm bush | Semi Intensive Care | Nomadic | Teko village | Male   | Grower | Serum |
| 189 | SLE/1089/17 SW |          |     | 0.11 | neg | Northern/Bombali | Pig farm | Swine | West African Duwarf | Community close to farm bush | Semi Intensive Care | Nomadic | Teko village | Male   | Grower | Serum |
| 190 | SLE/1090/17 SW | Pool 140 | neg | 0.10 | neg | Northern/Bombali | Pig farm | Swine | West African Duwarf | Community close to farm bush | Semi Intensive Care | Nomadic | Teko village | Female | Adult  | Serum |
| 191 | SLE/1091/17 SW |          |     | 0.12 | neg | Northern/Bombali | Pig farm | Swine | West African Duwarf | Community close to farm bush | Semi Intensive Care | Nomadic | Teko village | Female | Adult  | Serum |
| 192 | SLE/1092/17 SW |          |     | 0.11 | neg | Northern/Bombali | Pig farm | Swine | West African Duwarf | Community close to farm bush | Semi Intensive Care | Nomadic | Teko village | Female | Gilt   | Serum |
| 193 | SLE/1093/17 SW |          |     | 0.15 | neg | Northern/Bombali | Pig farm | Swine | West African Duwarf | Community close to farm bush | Semi Intensive Care | Nomadic | Teko village | Female | Gilt   | Serum |
| 194 | SLE/1094/17 SW | Pool 140 | neg | 0.15 | neg | Northern/Bombali | Pig farm | Swine | West African Duwarf | Community close to farm bush | Semi Intensive Care | Nomadic | Teko village | Female | Gilt   | Serum |
| 195 | SLE/1095/17 SW |          |     | 0.11 | neg | Northern/Bombali | Pig farm | Swine | West African Duwarf | Community close to farm bush | Semi Intensive Care | Nomadic | Teko village | Female | Gilt   | Serum |
| 196 | SLE/1096/17 SW |          |     | 0.12 | neg | n/a              | n/a      | n/a   | n/a                 | n/a                          | n/a                 | Nomadic | Teko village | Female | Gilt   | Serum |
| 197 | SLE/1097/17 SW |          |     | 0.09 | neg | n/a              | n/a      | n/a   | n/a                 | n/a                          | n/a                 | Nomadic | Teko village | Female | Gilt   | Serum |
| 198 | SLE/1098/17 SW | Pool 140 | neg | 0.14 | neg | n/a              | n/a      | n/a   | n/a                 | n/a                          | n/a                 | Nomadic | Teko village | Female | Gilt   | Serum |
| 199 | SLE/1099/17 SW |          |     | 0.08 | neg | n/a              | n/a      | n/a   | n/a                 | n/a                          | n/a                 | Nomadic | Teko village | Female | Gilt   | Serum |
| 200 | SLE/1100/17 SW |          |     | 0.10 | neg | n/a              | n/a      | n/a   | n/a                 | n/a                          | n/a                 | Nomadic | Teko village | Female | Gilt   | Serum |

| Nr          | Serum pools (Nr) | Findings (PCR) | OD405 | Finding | Region | District | Sampling Unit/Town/Village | Animal Species | Breed       | Habitat   | Housing/stable/Pasture/ Stationary/nomadic | Herd/Flock/Farm | Date of sample collection | History of migration | Gender | Age in month |
|-------------|------------------|----------------|-------|---------|--------|----------|----------------------------|----------------|-------------|-----------|--------------------------------------------|-----------------|---------------------------|----------------------|--------|--------------|
| SL 2017-401 | Pool 1           | neg            | 0.23  | neg     | South  | BO       | Tikanka Town               | Swine          | Large white | Farm bush | Stable                                     | Herd            | 26.05.2017                | Sunga                | F      | 18           |
| SL 2017-402 |                  |                | 0.28  | neg     | South  | BO       | Tikanka Town               | Swine          | Large white | Farm bush | Stable                                     | Herd            | 26.05.2017                | Sunga                | F      | 18           |
| SL 2017-403 |                  |                | 0.21  | neg     | South  | BO       | Tikanka Town               | Swine          | Large white | Farm bush | Stable                                     | Herd            | 26.05.2017                | Sunga                | F      | 24           |
| SL 2017-404 |                  |                | 0.30  | neg     | South  | BO       | Tikanka Town               | Swine          | Large white | Farm bush | Stable                                     | Herd            | 26.05.2017                | Sunga                | F      | 24           |
| SL 2017-405 | Pool 2           | neg            | 0.15  | neg     | South  | BO       | Tikanka Town               | Swine          | Large white | Farm bush | Stable                                     | Herd            | 26.05.2017                | Sunga                | F      | 6            |
| SL 2017-406 |                  |                | 0.19  | neg     | South  | BO       | Tikanka Town               | Swine          | Large white | Farm bush | Stable                                     | Herd            | 26.05.2017                | Sunga                | F      | 6            |
| SL 2017-407 |                  |                | 0.20  | neg     | South  | BO       | Tikanka Town               | Swine          | Large white | Farm bush | Stable                                     | Herd            | 26.05.2017                | Sunga                | F      | 24           |
| SL 2017-408 |                  |                | 0.22  | neg     | South  | BO       | Tikanka Town               | Swine          | Large white | Farm bush | Stable                                     | Herd            | 26.05.2017                | Sunga                | F      | 24           |
| SL 2017-409 | Pool 3           | neg            | 0.28  | neg     | South  | BO       | Tikanka Town               | Swine          | Large white | Farm bush | Stable                                     | Herd            | 26.05.2017                | Sunga                | F      | 18           |
| SL 2017-410 |                  |                | 0.25  | neg     | South  | BO       | Tikanka Town               | Swine          | Large white | Farm bush | Stable                                     | Herd            | 26.05.2017                | Sunga                | F      | 36           |
| SL 2017-411 |                  |                | 0.26  | neg     | South  | BO       | Tikanka Town               | Swine          | Large white | Farm bush | Stable                                     | Herd            | 26.05.2017                | Sunga                | F      | 24           |
| SL 2017-412 |                  |                | 0.17  | neg     | South  | BO       | Tikanka Town               | Swine          | Large white | Farm bush | Stable                                     | Herd            | 26.05.2017                | Sunga                | M      | 12           |
| SL 2017-413 | Pool 4           | neg            | 0.16  | neg     | South  | BO       | Tikanka Town               | Swine          | Large white | Farm bush | Stable                                     | Herd            | 26.05.2017                | Sunga                | F      | 12           |
| SL 2017-414 |                  |                | 0.20  | neg     | South  | BO       | Tikanka Town               | Swine          | Large white | Farm bush | Stable                                     | Herd            | 26.05.2017                | Sunga                | F      | 14           |
| SL 2017-415 |                  |                | 0.19  | neg     | South  | BO       | Tikanka Town               | Swine          | Large white | Farm bush | Stable                                     | Herd            | 26.05.2017                | Sunga                | F      | 6            |
| SL 2017-416 |                  |                | 0.16  | neg     | South  | BO       | Tikanka Town               | Swine          | Large white | Farm bush | Stable                                     | Herd            | 26.05.2017                | Sunga                | F      | 6            |
| SL 2017-417 | Pool 5           | neg            | 0.20  | neg     | South  | BO       | Tikanka Town               | Swine          | Large white | Farm bush | Stable                                     | Herd            | 26.05.2017                | Sunga                | F      | 6            |
| SL 2017-418 |                  |                | 0.33  | neg     | South  | BO       | Tikanka Town               | Swine          | Large white | Farm bush | Stable                                     | Herd            | 26.05.2017                | Bo city              | F      | 6            |
| SL 2017-419 |                  |                | 0.12  | neg     | South  | BO       | Tikanka Town               | Swine          | Large white | Farm bush | Stable                                     | Herd            | 26.05.2017                | Bo city              | F      | 8            |
| SL 2017-420 |                  |                | 0.19  | neg     | South  | BO       | Tikanka Town               | Swine          | Large white | Farm bush | Stable                                     | Herd            | 26.05.2017                | Bo city              | F      | 8            |
| SL 2017-421 | Pool 6           | neg            | 0.16  | neg     | South  | BO       | Tikanka Town               | Swine          | Large white | Farm bush | Stable                                     | Herd            | 26.05.2017                | Bo city              | F      | 8            |
| SL 2017-422 |                  |                | 0.21  | neg     | South  | BO       | Tikanka Town               | Swine          | Large white | Farm bush | Stable                                     | Herd            | 26.05.2017                | Bo city              | F      | 8            |
| SL 2017-423 |                  |                | 0.24  | neg     | South  | BO       | Tikanka Town               | Swine          | Large white | Farm bush | Stable                                     | Herd            | 26.05.2017                | Bo city              | F      | 8            |
| SL 2017-424 |                  |                | 0.15  | neg     | South  | BO       | Tikanka Town               | Swine          | Large white | Farm bush | Stable                                     | Herd            | 26.05.2017                | Bo city              | M      | 6            |
| SL 2017-425 | Pool 7           | neg            | 0.17  | neg     | South  | BO       | Tikanka Town               | Swine          | Large white | Farm bush | Stable                                     | Herd            | 26.05.2017                | Bo city              | M      | 6            |
| SL 2017-426 |                  |                | 0.21  | neg     | South  | BO       | Tikanka Town               | Swine          | Large white | Farm bush | Stable                                     | Herd            | 26.05.2017                | Bo city              | M      | 6            |
| SL 2017-427 |                  |                | ----- | neg     | South  | BO       | Tikanka Town               | Swine          | Large white | Farm bush | Stable                                     | Herd            | 26.05.2017                | Bo city              | M      | 6            |
| SL 2017-428 |                  |                | 0.21  | neg     | South  | BO       | Tikanka Town               | Swine          | Large white | Farm bush | Stable                                     | Herd            | 26.05.2017                | Bo city              | F      | 18           |
| SL 2017-429 | Pool 8           | neg            | 0.25  | neg     | South  | BO       | Tikanka Town               | Swine          | Large white | Farm bush | Stable                                     | Herd            | 26.05.2017                | Bo city              | F      | 24           |
| SL 2017-430 |                  |                | 0.25  | neg     | South  | BO       | Tikanka Town               | Swine          | Large white | Farm bush | Stable                                     | Herd            | 26.05.2017                | Bo city              | F      | 14           |
| SL 2017-431 |                  |                | 0.15  | neg     | South  | BO       | Lembema                    | Swine          | Large white | Forest    | Stable                                     | Flock           | 27.05.2017                | Bo city              | F      | 3            |
| SL 2017-432 |                  |                | 0.16  | neg     | South  | BO       | Lembema                    | Swine          | Large white | Forest    | Stable                                     | Flock           | 27.05.2017                | Bo city              | F      | 3            |
| SL 2017-433 | Pool 9           | neg            | 0.19  | neg     | South  | BO       | Lembema                    | Swine          | Large white | Forest    | Stable                                     | Flock           | 27.05.2017                | Bo city              | F      | 3            |
| SL 2017-434 |                  |                | 0.18  | neg     | South  | BO       | Lembema                    | Swine          | Large white | Forest    | Stable                                     | Flock           | 27.05.2017                | Bo city              | F      | 3            |
| SL 2017-435 |                  |                | 0.17  | neg     | South  | BO       | Lembema                    | Swine          | Large white | Forest    | Stable                                     | Flock           | 27.05.2017                | Bo city              | F      | 3            |
| SL 2017-436 |                  |                | 0.27  | neg     | South  | BO       | Lembema                    | Swine          | Large white | Forest    | Stable                                     | Flock           | 27.05.2017                | Bo city              | F      | 18           |
| SL 2017-437 | Pool 10          | neg            | 0.18  | neg     | South  | BO       | Lembema                    | Swine          | Large white | Forest    | Stable                                     | Flock           | 27.05.2017                | Bo city              | F      | 3            |
| SL 2017-438 |                  |                | 0.17  | neg     | South  | BO       | Lembema                    | Swine          | Large white | Forest    | Stable                                     | Flock           | 27.05.2017                | Bo city              | F      | 18           |
| SL 2017-439 |                  |                | 0.17  | neg     | South  | BO       | Lembema                    | Swine          | Large white | Forest    | Stable                                     | Flock           | 27.05.2017                | Bo city              | F      | 18           |
| SL 2017-440 |                  |                | 0.24  | neg     | South  | BO       | Lembema                    | Swine          | Large white | Forest    | Stable                                     | Flock           | 27.05.2017                | Bo city              | F      | 16           |
| SL 2017-441 | Pool 11          | neg            | 0.21  | neg     | South  | BO       | Lembema                    | Swine          | Large white | Forest    | Stable                                     | Flock           | 27.05.2017                | Bo city              | M      | 6            |
| SL 2017-442 |                  |                | 0.17  | neg     | South  | BO       | Lembema                    | Swine          | Large white | Forest    | Stable                                     | Flock           | 27.05.2017                | Bo city              | M      | 12           |
| SL 2017-443 |                  |                | 0.28  | neg     | South  | BO       | Lembema                    | Swine          | Large white | Forest    | Stable                                     | Flock           | 27.05.2017                | Bo city              | F      | 18           |
| SL 2017-444 |                  |                | 0.15  | neg     | South  | BO       | Lembema                    | Swine          | Large white | Forest    | Stable                                     | Flock           | 27.05.2017                | Bo city              | F      | 3            |
| SL 2017-445 | Pool 12          | neg            | 0.25  | neg     | South  | BO       | Lembema One                | Swine          | Large white | Forest    | Stable                                     | Flock           | 27.05.2017                | Bo city              | F      | 18           |
| SL 2017-446 |                  |                | 0.17  | neg     | South  | BO       | Lembema One                | Swine          | Large white | Forest    | Stable                                     | Flock           | 27.05.2017                | Bo city              | F      | 6            |
| SL 2017-447 |                  |                | 0.14  | neg     | South  | BO       | Lembema One                | Swine          | Large white | Forest    | Stable                                     | Flock           | 27.05.2017                | Bo city              | M      | 6            |
| SL 2017-448 |                  |                | 0.17  | neg     | South  | BO       | Lembema One                | Swine          | Large white | Forest    | Stable                                     | Flock           | 27.05.2017                | Bo city              | M      | 6            |
| SL 2017-449 | Pool 13          | neg            | 0.19  | neg     | South  | BO       | Lembema One                | Swine          | Large white | Farm bush | Stable                                     | Herd            | 28.05.2017                | Bo city              | F      | 18           |
| SL 2017-450 |                  |                | 0.14  | neg     | South  | BO       | Lembema One                | Swine          | Large white | Farm bush | Stable                                     | Herd            | 28.05.2017                | Bo city              | F      | 3            |
| SL 2017-451 |                  |                | 0.13  | neg     | South  | BO       | Lembema One                | Swine          | Large white | Farm bush | Stable                                     | Herd            | 28.05.2017                | Bo city              | M      | 3            |
| SL 2017-452 |                  |                | 0.14  | neg     | South  | BO       | Lembema One                | Swine          | Large white | Farm bush | Stable                                     | Herd            | 28.05.2017                | Bo city              | M      | 3            |
| SL 2017-453 | Pool 14          | neg            | 0.14  | neg     | South  | BO       | Lembema One                | Swine          | Large white | Farm bush | Stable                                     | Herd            | 28.05.2017                | Bo city              | M      | 3            |
| SL 2017-454 |                  |                | ----- | neg     | South  | BO       | Nyandehun                  | Swine          | Duroc       | Farm bush | Stable                                     | Herd            | 30.05.2017                | Bo city              | F      | 18           |
| SL 2017-455 |                  |                | 0.19  | neg     | South  | BO       | Nyandehun                  | Swine          | Duroc       | Farm bush | Stable                                     | Herd            | 30.05.2017                | Bo city              | F      | 28           |
| SL 2017-456 |                  |                | 0.14  | neg     | South  | BO       | Nyandehun                  | Swine          | Duroc       | Farm bush | Stable                                     | Herd            | 30.05.2017                | Bo city              | M      | 4            |
| SL 2017-457 | Pool 15          | neg            | 0.12  | neg     | South  | BO       | Nyandehun                  | Swine          | Duroc       | Farm bush | Stable                                     | Herd            | 30.05.2017                | Bo city              | F      | 4            |
| SL 2017-458 |                  |                | 0.14  | neg     | South  | BO       | Nyandehun                  | Swine          | Duroc       | Farm bush | Stable                                     | Herd            | 30.05.2017                | Bo city              | F      | 18           |
| SL 2017-459 |                  |                | 0.21  | neg     | South  | BO       | Nyandehun                  | Swine          | Duroc       | Farm bush | Stable                                     | Herd            | 30.05.2017                | Bo city              | F      | 20           |
| SL 2017-460 |                  |                | 0.21  | neg     | South  | BO       | Nyandehun                  | Swine          | Large white | Farm bush | Stable                                     | Herd            | 30.05.2017                | Bo city              | M      | 22           |

|             |         |     |      |     |       |    |              |       |             |           |        |         |            |          |   |    |
|-------------|---------|-----|------|-----|-------|----|--------------|-------|-------------|-----------|--------|---------|------------|----------|---|----|
| SL 2017-461 | Pool 13 | neg | 0.15 | neg | South | BO | Nyandehun    | Swine | Large white | Farm bush | Stable | Herd    | 30.05.2017 | Bo city  | M | 8  |
| SL 2017-462 |         |     | 0.19 | neg | South | BO | Nyandehun    | Swine | Large white | Farm bush | Stable | Herd    | 30.05.2017 | Bo city  | F | 8  |
| SL 2017-463 |         |     | 0.17 | neg | South | BO | Nyandehun    | Swine | Large white | Farm bush | Stable | Herd    | 30.05.2017 | Bo city  | M | 8  |
| SL 2017-464 |         |     | 0.18 | neg | South | BO | Nyandehun    | Swine | Large white | Farm bush | Stable | Herd    | 30.05.2017 | Bo city  | F | 18 |
| SL 2017-465 | Pool 14 | neg | 0.20 | neg | South | BO | Nyandehun    | Swine | Large white | Farm bush | Stable | Herd    | 30.05.2017 | Bo city  | F | 18 |
| SL 2017-466 |         |     | 0.18 | neg | South | BO | Nyandehun    | Swine | Large white | Farm bush | Stable | Herd    | 30.05.2017 | Bo city  | F | 14 |
| SL 2017-467 |         |     | 0.29 | neg | South | BO | Bo Town      | Swine | Large white | Farm bush | Stable | Farm    | 30.05.2017 | Bo city  | F | 10 |
| SL 2017-468 |         |     | 0.18 | neg | South | BO | Bo Town      | Swine | Large white | Farm bush | Stable | Farm    | 30.05.2017 | Bo city  | F | 10 |
| SL 2017-469 | Pool 15 | neg | 0.18 | neg | South | BO | Bo Town      | Swine | Large white | Farm bush | Stable | Farm    | 30.05.2017 | Bo city  | F | 10 |
| SL 2017-470 |         |     | 0.16 | neg | South | BO | Bo Town      | Swine | Large white | Farm bush | Stable | Farm    | 30.05.2017 | Bo city  | F | 10 |
| SL 2017-471 |         |     | 0.15 | neg | South | BO | Bo Town      | Swine | Large white | Farm bush | Stable | Farm    | 30.05.2017 | Bo city  | F | 9  |
| SL 2017-472 |         |     | 0.14 | neg | South | BO | Bo Town      | Swine | Duroc       | Farm bush | Stable | Farm    | 30.05.2017 | Bo city  | F | 9  |
| SL 2017-473 | Pool 16 | neg | 0.17 | neg | South | BO | Bo Town      | Swine | Duroc       | Farm bush | Stable | Farm    | 30.05.2017 | Bo city  | F | 9  |
| SL 2017-474 |         |     | 0.20 | neg | South | BO | Bo Town      | Swine | Duroc       | Farm bush | Stable | Farm    | 30.05.2017 | Bo city  | M | 8  |
| SL 2017-475 |         |     | 0.16 | neg | South | BO | Bo Town      | Swine | Duroc       | Farm bush | Stable | Farm    | 30.05.2017 | Bo city  | M | 10 |
| SL 2017-476 |         |     | 0.33 | neg | South | BO | Bo Town      | Swine | Large white | Farm bush | Stable | Farm    | 30.05.2017 | Bo city  | M | 10 |
| SL 2017-477 | Pool 17 | neg | 0.18 | neg | South | BO | Bo Town      | Swine | Duroc       | Farm bush | Stable | Farm    | 30.05.2017 | Bo city  | M | 10 |
| SL 2017-478 |         |     | 0.28 | neg | South | BO | Bo Town      | Swine | Large white | Farm bush | Stable | Farm    | 30.05.2017 | Bo city  | M | 18 |
| SL 2017-479 |         |     | 0.22 | neg | South | BO | Bo Town      | Swine | Large white | Farm bush | Stable | Farm    | 30.05.2017 | Bo city  | M | 6  |
| SL 2017-480 |         |     | 0.15 | neg | South | BO | Bo Town      | Swine | Large white | Farm bush | Stable | Farm    | 30.05.2017 | Bo city  | M | 10 |
| SL 2017-481 | Pool 18 | neg | 0.21 | neg | South | BO | Bo Town      | Swine | Large white | Farm bush | Stable | Herd    | 31.05.2017 | Freetown | F | 14 |
| SL 2017-482 |         |     | 0.17 | neg | South | BO | Bo Town      | Swine | Large white | Farm bush | Stable | Herd    | 31.05.2017 | Freetown | M | 3  |
| SL 2017-483 |         |     | 0.15 | neg | South | BO | Bo Town      | Swine | Duroc       | Farm bush | Stable | Herd    | 31.05.2017 | Freetown | F | 3  |
| SL 2017-484 |         |     | 0.14 | neg | South | BO | Bo Town      | Swine | Duroc       | Farm bush | Stable | Herd    | 31.05.2017 | Freetown | M | 3  |
| SL 2017-485 | Pool 19 | neg | 0.13 | neg | South | BO | Bo Town      | Swine | Duroc       | Farm bush | Stable | Herd    | 31.05.2017 | Freetown | M | 3  |
| SL 2017-486 |         |     | 0.14 | neg | South | BO | Bo Town      | Swine | Duroc       | Farm bush | Stable | Herd    | 31.05.2017 | Freetown | F | 3  |
| SL 2017-487 |         |     | 0.15 | neg | South | BO | Bo Town      | Swine | Duroc       | Farm bush | Stable | Herd    | 31.05.2017 | Freetown | F | 3  |
| SL 2017-488 |         |     | 0.17 | neg | South | BO | Bo Town      | Swine | Large white | Farm bush | Stable | Herd    | 31.05.2017 | Freetown | M | 3  |
| SL 2017-489 | Pool 20 | neg | 0.16 | neg | South | BO | Bo Town      | Swine | Large white | Farm bush | Stable | Herd    | 31.05.2017 | Freetown | F | 3  |
| SL 2017-490 |         |     | 0.14 | neg | South | BO | Bo Town      | Swine | Large white | Farm bush | Stable | Herd    | 31.05.2017 | Freetown | F | 2  |
| SL 2017-491 |         |     | 0.23 | neg | South | BO | Bo Town      | Swine | Large white | Farm bush | Stable | Herd    | 31.05.2017 | Freetown | M | 2  |
| SL 2017-492 |         |     | 0.17 | neg | South | BO | Bo Town      | Swine | Large white | Farm bush | Stable | Herd    | 31.05.2017 | Freetown | M | 2  |
| SL 2017-493 | Pool 21 | neg | 0.14 | neg | South | BO | Bo Town      | Swine | Large white | Farm bush | Stable | Herd    | 31.05.2017 | Freetown | F | 18 |
| SL 2017-494 |         |     | 0.18 | neg | South | BO | Bo Town      | Swine | Duroc       | Farm bush | Stable | Herd    | 31.05.2017 | Freetown | F | 3  |
| SL 2017-495 |         |     | 0.14 | neg | South | BO | Bo Town      | Swine | Large white | Farm bush | Stable | Herd    | 31.05.2017 | Freetown | M | 3  |
| SL 2017-496 |         |     | 0.14 | neg | South | BO | Bo Town      | Swine | Large white | Farm bush | Stable | Herd    | 31.05.2017 | Freetown | F | 3  |
| SL 2017-497 | Pool 22 | neg | 0.14 | neg | South | BO | Bo Town      | Swine | Large white | Farm bush | Stable | Herd    | 31.05.2017 | Freetown | F | 3  |
| SL 2017-498 |         |     | 0.24 | neg | South | BO | Bo Town      | Swine | Large white | Farm bush | Stable | Holland | 31.05.2017 | Holland  | F | 8  |
| SL 2017-499 |         |     | 0.17 | neg | South | BO | Bo Town      | Swine | Large white | Farm bush | Stable | Herd    | 31.05.2017 | Holland  | M | 8  |
| SL 2017-500 |         |     | 0.18 | neg | South | BO | Bo Town      | Swine | Large white | Farm bush | Stable | Herd    | 31.05.2017 | Holland  | F | 8  |
| SL 2017-501 | Pool 23 | neg | 0.13 | neg | South | BO | Bo Town      | Swine | Large white | Farm bush | Stable | Herd    | 31.05.2017 | Holland  | M | 8  |
| SL 2017-502 |         |     | 0.15 | neg | South | BO | Bo Town      | Swine | Duroc       | Farm bush | Stable | Herd    | 31.05.2017 | Holland  | F | 8  |
| SL 2017-503 |         |     | 0.19 | neg | South | BO | Bo Town      | Swine | Duroc       | Farm bush | Stable | Herd    | 31.05.2017 | Holland  | F | 8  |
| SL 2017-504 |         |     | 0.16 | neg | South | BO | Bo Town      | Swine | Large white | Farm bush | Stable | Herd    | 01.06.2017 | n/a      | F | 22 |
| SL 2017-505 | Pool 24 | neg | 0.20 | neg | South | BO | Bo Town      | Swine | Large white | Farm bush | Stable | Herd    | 01.06.2017 | n/a      | F | 22 |
| SL 2017-506 |         |     | 0.26 | neg | South | BO | Bo Town      | Swine | Large white | Farm bush | Stable | Herd    | 01.06.2017 | n/a      | F | 18 |
| SL 2017-507 |         |     | 0.14 | neg | South | BO | Bo Town      | Swine | Duroc       | Farm bush | Stable | Herd    | 01.06.2017 | n/a      | F | 3  |
| SL 2017-508 |         |     | 0.16 | neg | South | BO | Bo Town      | Swine | Large white | Farm bush | Stable | n/a     | 01.06.2017 | n/a      | M | 3  |
| SL 2017-509 | Pool 25 | neg | 0.16 | neg | South | BO | Bo Town      | Swine | Large white | Farm bush | Stable | Herd    | 01.06.2017 | n/a      | F | 3  |
| SL 2017-510 |         |     | 0.25 | neg | South | BO | Bo Town      | Swine | Large white | Farm bush | Stable | Herd    | 01.06.2017 | n/a      | F | 20 |
| SL 2017-511 |         |     | 0.14 | neg | South | BO | Bo Town      | Swine | Duroc       | Farm bush | Stable | Herd    | 01.06.2017 | n/a      | M | 3  |
| SL 2017-512 |         |     | 0.15 | neg | South | BO | Bo Town      | Swine | Large white | Farm bush | Stable | Herd    | 01.06.2017 | n/a      | M | 3  |
| SL 2017-513 | Pool 26 | neg | 0.18 | neg | South | BO | Bo Town      | Swine | Large white | Farm bush | Stable | Herd    | 01.06.2017 | n/a      | M | 3  |
| SL 2017-514 |         |     | 0.18 | neg | South | BO | Bo Town      | Swine | Large white | Farm bush | Stable | Herd    | 01.06.2017 | n/a      | F | 3  |
| SL 2017-515 |         |     | 0.16 | neg | South | BO | Bo Town      | Swine | Large white | Farm bush | Stable | Herd    | 01.06.2017 | n/a      | M | 3  |
| SL 2017-516 |         |     | 0.16 | neg | South | BO | Bo Town      | Swine | Large white | Farm bush | Stable | Herd    | 01.06.2017 | n/a      | M | 3  |
| SL 2017-517 | Pool 27 | neg | 0.17 | neg | South | BO | Bo Town      | Swine | Large white | Farm bush | Stable | n/a     | 01.06.2017 | n/a      | M | 3  |
| SL 2017-518 |         |     | 0.20 | neg | South | BO | Bo Town      | Swine | Duroc       | Farm bush | Stable | Herd    | 01.06.2017 | n/a      | M | 24 |
| SL 2017-519 |         |     | 0.23 | neg | South | BO | Bo Town      | Swine | Large white | Farm bush | Stable | Herd    | 01.06.2017 | n/a      | M | 3  |
| SL 2017-520 |         |     | 0.14 | neg | South | BO | Bo Town      | Swine | Large white | Farm bush | Stable | Herd    | 01.06.2017 | n/a      | F | 24 |
| SL 2017-521 | Pool 28 | neg | 0.21 | neg | South | BO | Bo Town      | Swine | Large white | Farm bush | Stable | Herd    | 01.06.2017 | n/a      | F | 24 |
| SL 2017-522 |         |     | 0.26 | neg | South | BO | Bo Town      | Swine | Large white | Farm bush | Stable | Herd    | 01.06.2017 | n/a      | F | 24 |
| SL 2017-523 |         |     | 0.21 | neg | South | BO | Bo Town      | Swine | Large white | Farm bush | Stable | Herd    | 01.06.2017 | n/a      | F | 24 |
| SL 2017-524 |         |     | 0.22 | neg | South | BO | Bo Town      | Swine | Duroc       | Farm bush | Stable | Herd    | 01.06.2017 | n/a      | F | 24 |
| SL 2017-525 | Pool 29 | neg | 0.26 | neg | South | BO | Bo Town      | Swine | Large white | Farm bush | Stable | Herd    | 01.06.2017 | n/a      | F | 24 |
| SL 2017-526 |         |     | 0.14 | neg | South | BO | Bo Town      | Swine | Large white | Farm bush | Stable | Herd    | 01.06.2017 | n/a      | F | 3  |
| SL 2017-527 |         |     | 0.14 | neg | South | BO | Bo Town      | Swine | Large white | Farm bush | Stable | Herd    | 01.06.2017 | n/a      | M | 3  |
| SL 2017-528 |         |     | 0.14 | neg | South | BO | Bo Town      | Swine | Large white | Farm bush | Stable | Herd    | 01.06.2017 | n/a      | F | 24 |
| SL 2017-529 | Pool 30 | neg | 0.21 | neg | South | BO | Bo Town      | Swine | Large white | Farm bush | Stable | Herd    | 01.06.2017 | n/a      | F | 3  |
| SL 2017-530 |         |     | 0.18 | neg | South | BO | Bo Town      | Swine | Duroc       | Farm bush | Stable | Herd    | 01.06.2017 | n/a      | M | 3  |
| SL 2017-531 |         |     | 0.17 | neg | South | BO | Bo Town      | Swine | Duroc       | Farm bush | Stable | Herd    | 01.06.2017 | n/a      | F | 3  |
| SL 2017-532 |         |     | 0.19 | neg | South | BO | Bo Town      | Swine | Duroc       | Farm bush | Stable | Herd    | 01.06.2017 | n/a      | F | 3  |
| SL 2017-533 | Pool 31 | neg | 0.17 | neg | South | BO | Bo Town      | Swine | Large white | Farm bush | Stable | Herd    | 01.06.2017 | n/a      | M | 3  |
| SL 2017-534 |         |     | 0.17 | neg | South | BO | Bo Town      | Swine | Large white | Farm bush | Stable | Herd    | 01.06.2017 | n/a      | M | 3  |
| SL 2017-535 |         |     | 0.16 | neg | South | BO | Bo Town      | Swine | Large white | Farm bush | Stable | Herd    | 01.06.2017 | n/a      | M | 3  |
| SL 2017-536 |         |     | 0.16 | neg | South | BO | Bo Town      | Swine | Large white | Farm bush | Stable | Herd    | 01.06.2017 | n/a      | F | 3  |
| SL 2017-537 | Pool 32 | neg | 0.17 | neg | South | BO | Bo Town      | Swine | Large white | Farm bush | Stable | Herd    | 01.06.2017 | n/a      | M | 3  |
| SL 2017-538 |         |     | 0.24 | neg | South | BO | Bo Town      | Swine | Large white | Farm bush | Stable | Herd    | 01.06.2017 | n/a      | F | 3  |
| SL 2017-539 |         |     | 0.17 | neg | South | BO | Bo Town      | Swine | Large white | Farm bush | Stable | Herd    | 01.06.2017 | n/a      | F | 3  |
| SL 2017-540 |         |     | 0.18 | neg | South | BO | Bo Town      | Swine | Large white | Farm bush | Stable | Herd    | 01.06.2017 | n/a      | M | 3  |
| SL 2017-541 | Pool 33 | neg | 0.14 | neg | South | BO | Tarwama Town | Swine | Large white | Farm bush | Stable | Herd    | 02.06.2017 | Bumpenh  | M | 8  |
| SL 2017-542 |         |     | 0.17 | neg | South | BO | Tarwama Town | Swine | Large white | Farm bush | Stable | Herd    | 02.06.2017 | Bumpenh  | M | 8  |
| SL 2017-543 |         |     | 0.12 | neg | South | BO | Tarwama Town | Swine | Large white | Farm bush | Stable | Herd    | 02.06.2017 | Bumpenh  | M | 3  |
| SL 2017-544 |         |     | 0.15 | neg | South | BO | Tarwama Town | Swine | Duroc       | Farm bush | Stable | Herd    | 02.06.2017 | Bumpenh  | F | 3  |
| SL 2017-545 | Pool 34 | neg | 0.14 | neg | South | BO | Tarwama Town | Swine | Duroc       | Farm bush | Stable | Herd    | 02.06.2017 | Bumpenh  | F | 3  |
| SL 2017-546 |         |     | 0.25 | neg | South | BO | Tarwama Town | Swine | Large white | Farm bush | Stable | Herd    | 02.06.2017 | Bumpenh  | F | 3  |
| SL 2017-547 |         |     | 0.21 | neg | South | BO | Tarwama Town | Swine | Large white | Farm bush | Stable | Herd    | 02.06.2017 | Bumpenh  | F | 24 |
| SL 2017-548 |         |     | 0.15 | neg | South | BO | Tarwama Town | Swine | Large white | Farm bush | Stable | Herd    | 02.06.2017 | Bumpenh  | F | 24 |
| SL 2017-549 | Pool 35 | neg | 0.21 | neg | South | BO | Tarwama Town | Swine | Large white | Farm bush | Stable | Herd    | 02.06.2017 | BO       | F | 8  |
| SL 2017-550 |         |     | 0.21 | neg | South | BO | Tarwama Town | Swine | Large white | Farm bush | Stable | Herd    | 02.06.2017 | BO       | F | 8  |



|             |         |     |      |     |       |    |              |       |             |           |        |      |            |         |   |    |
|-------------|---------|-----|------|-----|-------|----|--------------|-------|-------------|-----------|--------|------|------------|---------|---|----|
| SL 2017-550 | Pool 31 | neg | 0.12 | neg | South | BO | Tarwama Town | Swine | Large white | Farm bush | Stable | Herd | 02.06.2017 | BO      | F | 8  |
| SL 2017-551 |         |     | 0.23 | neg | South | BO | Tarwama Town | Swine | Large white | Farm bush | Stable | Herd | 02.06.2017 | BO      | F | 16 |
| SL 2017-552 |         |     | 0.25 | neg | South | BO | Tarwama Town | Swine | Large white | Farm bush | Stable | Herd | 02.06.2017 | BO      | F | 16 |
| SL 2017-553 |         |     | 0.24 | neg | South | BO | Tarwama Town | Swine | Large white | Farm bush | Stable | Herd | 02.06.2017 | BO      | F | 14 |
| SL 2017-554 |         |     | 0.22 | neg | South | BO | Tarwama Town | Swine | Large white | Farm bush | Stable | Herd | 02.06.2017 | BO      | F | 14 |
| SL 2017-555 | Pool 32 | neg | 0.31 | neg | South | BO | Tarwama Town | Swine | Large white | Farm bush | Stable | Herd | 02.06.2017 | BO      | M | 3  |
| SL 2017-556 |         |     | 0.19 | neg | South | BO | Tarwama Town | Swine | Large white | Farm bush | Stable | Herd | 02.06.2017 | BO      | M | 3  |
| SL 2017-557 |         |     | 0.21 | neg | South | BO | Tarwama Town | Swine | Duroc       | Farm bush | Stable | Herd | 02.06.2017 | BO      | M | 3  |
| SL 2017-558 |         |     | 0.22 | neg | South | BO | Tarwama Town | Swine | Duroc       | Farm bush | Stable | Herd | 02.06.2017 | BO      | M | 3  |
| SL 2017-559 |         |     | 0.17 | neg | South | BO | Tarwama Town | Swine | Duroc       | Farm bush | Stable | Herd | 02.06.2017 | BO      | M | 3  |
| SL 2017-560 | Pool 33 | neg | 0.25 | neg | South | BO | Tikanka Town | Swine | Large white | Farm bush | Stable | Herd | 02.06.2017 | BO      | M | 3  |
| SL 2017-561 |         |     | 0.17 | neg | South | BO | Tikanka Town | Swine | Large white | Farm bush | Stable | Herd | 02.06.2017 | BO      | M | 3  |
| SL 2017-562 |         |     | 0.14 | neg | South | BO | Bo Town      | Swine | Duroc       | Farm bush | Stable | Herd | 03.06.2017 | BO      | F | 7  |
| SL 2017-563 |         |     | 0.22 | neg | South | BO | Bo Town      | Swine | Duroc       | Farm bush | Stable | Herd | 03.06.2017 | BO      | F | 7  |
| SL 2017-564 |         |     | 0.13 | neg | South | BO | Bo Town      | Swine | Duroc       | Farm bush | Stable | Herd | 03.06.2017 | BO      | F | 7  |
| SL 2017-565 | Pool 34 | neg | 0.17 | neg | South | BO | Bo Town      | Swine | Duroc       | Farm bush | Stable | Herd | 03.06.2017 | BO      | F | 7  |
| SL 2017-566 |         |     | 0.18 | neg | South | BO | Bo Town      | Swine | Duroc       | Farm bush | Stable | Herd | 03.06.2017 | BO      | F | 12 |
| SL 2017-567 |         |     | 0.21 | neg | South | BO | Bo Town      | Swine | Large white | Farm bush | Stable | Herd | 03.06.2017 | BO      | F | 12 |
| SL 2017-568 |         |     | 0.18 | neg | South | BO | Bo Town      | Swine | Duroc       | Farm bush | Stable | Herd | 03.06.2017 | BO      | F | 12 |
| SL 2017-569 |         |     | 0.16 | neg | South | BO | Bo Town      | Swine | Large white | Farm bush | Stable | Herd | 03.06.2017 | BO      | F | 12 |
| SL 2017-570 | Pool 35 | neg | 0.19 | neg | South | BO | Bo Town      | Swine | Large white | Farm bush | Stable | Herd | 03.06.2017 | BO      | F | 14 |
| SL 2017-571 |         |     | 0.16 | neg | South | BO | Bo Town      | Swine | Large white | Farm bush | Stable | Herd | 03.06.2017 | BO      | F | 8  |
| SL 2017-572 |         |     | 0.17 | neg | South | BO | Bo Town      | Swine | Large white | Farm bush | Stable | Herd | 03.06.2017 | BO      | F | 12 |
| SL 2017-573 |         |     | 0.18 | neg | South | BO | Bo Town      | Swine | Large white | Farm bush | Stable | Herd | 03.06.2017 | BO      | F | 12 |
| SL 2017-574 |         |     | 0.14 | neg | South | BO | Bo Town      | Swine | Duroc       | Farm bush | Stable | Herd | 03.06.2017 | BO      | F | 3  |
| SL 2017-575 | Pool 36 | neg | 0.15 | neg | South | BO | Bo Town      | Swine | Duroc       | Farm bush | Stable | Herd | 03.06.2017 | BO      | M | 3  |
| SL 2017-576 |         |     | 0.15 | neg | South | BO | Bo Town      | Swine | Duroc       | Farm bush | Stable | Herd | 03.06.2017 | BO      | M | 3  |
| SL 2017-577 |         |     | 0.16 | neg | South | BO | Bo Town      | Swine | Duroc       | Farm bush | Stable | Herd | 03.06.2017 | BO      | M | 3  |
| SL 2017-578 |         |     | 0.17 | neg | South | BO | Bo Town      | Swine | Duroc       | Farm bush | Stable | Herd | 03.06.2017 | BO      | M | 3  |
| SL 2017-579 |         |     | 0.22 | neg | South | BO | Bo Town      | Swine | Duroc       | Farm bush | Stable | Herd | 03.06.2017 | BO      | M | 3  |
| SL 2017-580 | Pool 37 | neg | 0.15 | neg | South | BO | Bo Town      | Swine | Duroc       | Farm bush | Stable | Herd | 03.06.2017 | BO      | M | 3  |
| SL 2017-581 |         |     | 0.16 | neg | South | BO | Bo Town      | Swine | Duroc       | Farm bush | Stable | Herd | 03.06.2017 | BO      | F | 3  |
| SL 2017-582 |         |     | 0.15 | neg | South | BO | Bo Town      | Swine | Duroc       | Farm bush | Stable | Herd | 03.06.2017 | BO      | M | 3  |
| SL 2017-583 |         |     | 0.23 | neg | South | BO | Bo Town      | Swine | Duroc       | Farm bush | Stable | Herd | 03.06.2017 | BO      | F | 24 |
| SL 2017-584 |         |     | 0.18 | neg | South | BO | Bo Town      | Swine | Duroc       | Farm bush | Stable | Herd | 03.06.2017 | BO      | M | 6  |
| SL 2017-585 | Pool 38 | neg | 0.21 | neg | South | BO | Bo Town      | Swine | Duroc       | Farm bush | Stable | Herd | 03.06.2017 | BO      | M | 6  |
| SL 2017-586 |         |     | 0.19 | neg | South | BO | Bo Town      | Swine | Duroc       | Farm bush | Stable | Herd | 03.06.2017 | BO      | M | 6  |
| SL 2017-587 |         |     | 0.26 | neg | South | BO | Bo Town      | Swine | Duroc       | Farm bush | Stable | Herd | 03.06.2017 | BO      | M | 6  |
| SL 2017-588 |         |     | 0.13 | neg | South | BO | Bo Town      | Swine | Duroc       | Farm bush | Stable | Herd | 03.06.2017 | BO      | M | 6  |
| SL 2017-589 |         |     | 0.13 | neg | South | BO | Bo Town      | Swine | Duroc       | Farm bush | Stable | Herd | 03.06.2017 | BO      | M | 6  |
| SL 2017-590 | Pool 39 | neg | 0.13 | neg | South | BO | Bo Town      | Swine | Duroc       | Farm bush | Stable | Herd | 03.06.2017 | BO      | M | 6  |
| SL 2017-591 |         |     | 0.16 | neg | South | BO | Bo Town      | Swine | Large white | Farm bush | Stable | Herd | 03.06.2017 | BO      | M | 7  |
| SL 2017-592 |         |     | 0.16 | neg | South | BO | Bo Town      | Swine | Large white | Farm bush | Stable | Herd | 03.06.2017 | BO      | M | 7  |
| SL 2017-593 |         |     | 0.16 | neg | South | BO | Bo Town      | Swine | Large white | Farm bush | Stable | Herd | 03.06.2017 | BO      | M | 7  |
| SL 2017-594 |         |     | 0.16 | neg | South | BO | Bo Town      | Swine | Large white | Farm bush | Stable | Herd | 03.06.2017 | BO      | M | 7  |
| SL 2017-595 | Pool 40 | neg | 0.14 | neg | South | BO | Bo Town      | Swine | Large white | Farm bush | Stable | Herd | 03.06.2017 | BO      | M | 7  |
| SL 2017-596 |         |     | 0.18 | neg | South | BO | Bo Town      | Swine | Large white | Farm bush | Stable | Herd | 03.06.2017 | BO      | M | 7  |
| SL 2017-597 |         |     | 0.14 | neg | South | BO | Bo Town      | Swine | Large white | Farm bush | Stable | Herd | 03.06.2017 | BO      | M | 7  |
| SL 2017-598 |         |     | 0.13 | neg | South | BO | Bo Town      | Swine | Large white | Farm bush | Stable | Herd | 03.06.2017 | BO      | M | 7  |
| SL 2017-599 |         |     | 0.13 | neg | South | BO | Bo Town      | Swine | Large white | Farm bush | Stable | Herd | 03.06.2017 | BO      | F | 8  |
| SL 2017-600 | Pool 41 | neg | 0.14 | neg | South | BO | Bo Town      | Swine | Large white | Farm bush | Stable | Herd | 03.06.2017 | BO      | F | 8  |
| SL 2017-601 |         |     | 0.18 | neg | South | BO | Bo Town      | Swine | Large white | Farm bush | Stable | Herd | 03.06.2017 | BO      | F | 8  |
| SL 2017-602 |         |     | 0.14 | neg | South | BO | Bo Town      | Swine | Large white | Farm bush | Stable | Herd | 03.06.2017 | BO      | F | 8  |
| SL 2017-603 |         |     | 0.16 | neg | South | BO | Bo Town      | Swine | Duroc       | Farm bush | Stable | Herd | 03.06.2017 | BO      | F | 3  |
| SL 2017-604 |         |     | 0.14 | neg | South | BO | Bo Town      | Swine | Duroc       | Farm bush | Stable | Herd | 03.06.2017 | BO      | F | 3  |
| SL 2017-605 | Pool 42 | neg | 0.13 | neg | South | BO | Bo Town      | Swine | Large white | Farm bush | Stable | Herd | 03.06.2017 | BO      | M | 3  |
| SL 2017-606 |         |     | 0.14 | neg | South | BO | Bo Town      | Swine | Large white | Farm bush | Stable | Herd | 03.06.2017 | BO      | F | 3  |
| SL 2017-607 |         |     | 0.16 | neg | South | BO | Bo Town      | Swine | Large white | Farm bush | Stable | Herd | 03.06.2017 | BO      | F | 3  |
| SL 2017-608 |         |     | 0.16 | neg | South | BO | Bo Town      | Swine | Large white | Farm bush | Stable | Herd | 03.06.2017 | BO      | M | 3  |
| SL 2017-609 |         |     | 0.14 | neg | South | BO | Bo Town      | Swine | Large white | Farm bush | Stable | Herd | 03.06.2017 | BO      | F | 3  |
| SL 2017-610 | Pool 43 | neg | 0.14 | neg | South | BO | Bo Town      | Swine | Duroc       | Farm bush | Stable | Herd | 03.06.2017 | BO      | F | 38 |
| SL 2017-611 |         |     | 0.38 | neg | South | BO | Bo Town      | Swine | Large white | Farm bush | Stable | Herd | 03.06.2017 | BO      | F | 14 |
| SL 2017-612 |         |     | 0.22 | neg | South | BO | Bo Town      | Swine | Large white | Farm bush | Stable | Herd | 03.06.2017 | BO      | F | 12 |
| SL 2017-613 |         |     | 0.15 | neg | South | BO | Bo Town      | Swine | Large white | Farm bush | Stable | Herd | 03.06.2017 | BO      | F | 12 |
| SL 2017-614 |         |     | 0.17 | neg | South | BO | Bo Town      | Swine | Large white | Farm bush | Stable | Herd | 03.06.2017 | BO      | F | 24 |
| SL 2017-615 | Pool 44 | neg | 0.11 | neg | South | BO | Bo Town      | Swine | Large white | Farm bush | Stable | Herd | 03.06.2017 | BO      | F | 12 |
| SL 2017-616 |         |     | 0.44 | pos | South | BO | Bo Town      | Swine | Large white | Farm bush | Stable | Herd | 02.06.2017 | BO      | F | 12 |
| SL 2017-617 |         |     | 0.23 | neg | South | BO | Bo Town      | Swine | Large white | Farm bush | Stable | Herd | 03.06.2017 | BO      | F | 12 |
| SL 2017-618 |         |     | 0.20 | neg | South | BO | Bo Town      | Swine | Large white | Farm bush | Stable | Herd | 03.06.2017 | BO      | F | 14 |
| SL 2017-619 |         |     | 0.26 | neg | South | BO | Bo Town      | Swine | Large white | Farm bush | Stable | Herd | 03.06.2017 | BO      | F | 20 |
| SL 2017-620 | Pool 45 | neg | 0.20 | neg | South | BO | Bo Town      | Swine | Large white | Farm bush | Stable | Herd | 03.06.2017 | BO      | F | 20 |
| SL 2017-621 |         |     | 0.19 | neg | South | BO | Bo Town      | Swine | Large white | Farm bush | Stable | Herd | 03.06.2017 | BO      | F | 20 |
| SL 2017-622 |         |     | 0.14 | neg | South | BO | Bo Town      | Swine | Large white | Farm bush | Stable | Herd | 03.06.2017 | BO      | M | 10 |
| SL 2017-623 |         |     | 0.17 | neg | South | BO | Bo Town      | Swine | Large white | Farm bush | Stable | Herd | 03.06.2017 | BO      | F | 10 |
| SL 2017-624 |         |     | 0.18 | neg | South | BO | Bo Town      | Swine | Large white | Farm bush | Stable | Herd | 03.06.2017 | BO      | F | 10 |
| SL 2017-625 | Pool 46 | neg | 0.16 | neg | South | BO | Bo Town      | Swine | Large white | Farm bush | Stable | Herd | 03.06.2017 | BO      | F | 10 |
| SL 2017-626 |         |     | 0.15 | neg | South | BO | Bo Town      | Swine | Large white | Farm bush | Stable | Herd | 03.06.2017 | BO      | F | 10 |
| SL 2017-627 |         |     | 0.20 | neg | South | BO | Bo Town      | Swine | Duroc       | Farm bush | Stable | Herd | 03.06.2017 | BO      | M | 26 |
| SL 2017-628 |         |     | 0.21 | neg | South | BO | Bo Town      | Swine | Duroc       | Farm bush | Stable | Herd | 03.06.2017 | BO      | M | 30 |
| SL 2017-629 |         |     | 0.19 | neg | South | BO | Bo Town      | Swine | Large white | Farm bush | Stable | Herd | 03.06.2017 | BO      | F | 30 |
| SL 2017-630 | Pool 47 | neg | 0.18 | neg | South | BO | Bo Town      | Swine | Large white | Farm bush | Stable | Herd | 04.06.2017 | BO      | M | 18 |
| SL 2017-631 |         |     | 0.24 | neg | South | BO | Bo Town      | Swine | Large white | Farm bush | Stable | Herd | 04.06.2017 | BO      | M | 21 |
| SL 2017-632 |         |     | 0.17 | neg | South | BO | Bo Town      | Swine | Large white | Farm bush | Stable | Herd | 04.06.2017 | BO      | F | 21 |
| SL 2017-633 |         |     | 0.21 | neg | South | BO | Bo Town      | Swine | Large white | Farm bush | Stable | Herd | 04.06.2017 | BO      | F | 21 |
| SL 2017-634 |         |     | 0.18 | neg | South | BO | Bo Town      | Swine | Large white | Farm bush | Stable | Herd | 04.06.2017 | BO      | F | 21 |
| SL 2017-635 | Pool 48 | neg | 0.17 | neg | South | BO | Bo Town      | Swine | Large white | Farm bush | Stable | Herd | 04.06.2017 | BO      | F | 21 |
| SL 2017-636 |         |     | 0.21 | neg | South | BO | Bo Town      | Swine | Large white | Farm bush | Stable | Herd | 04.06.2017 | BO      | M | 8  |
| SL 2017-637 |         |     | 0.25 | neg | South | BO | Bo Town      | Swine | Large white | Farm bush | Stable | Herd | 04.06.2017 | Pujehun | M | 18 |
| SL 2017-638 |         |     | 0.15 | neg | South | BO | Bo Town      | Swine | Large white | Farm bush | Stable | Herd | 04.06.2017 | BO      | M | 18 |
|             |         |     |      |     |       |    |              |       |             |           |        |      |            |         |   |    |

|             |         |     |      |     |       |         |              |       |             |           |        |      |            |        |   |    |
|-------------|---------|-----|------|-----|-------|---------|--------------|-------|-------------|-----------|--------|------|------------|--------|---|----|
| SL 2017-639 |         |     | 0.29 | neg | South | BO      | Bo Town      | Swine | Large white | Farm bush | Stable | Herd | 04.06.2017 | 80     | F | 17 |
| SL 2017-640 |         |     | 0.17 | neg | South | BO      | Bo Town      | Swine | Large white | Farm bush | Stable | Herd | 04.06.2017 | 80     | F | 12 |
| SL 2017-641 |         |     | 0.21 | neg | South | BO      | Bo Town      | Swine | Large white | Farm bush | Stable | Herd | 04.06.2017 | 80     | F | 19 |
| SL 2017-642 |         |     | 0.15 | neg | South | BO      | Bo Town      | Swine | Large white | Farm bush | Stable | Herd | 04.06.2017 | 80     | F | 20 |
| SL 2017-643 | Pool 49 | neg | 0.12 | neg | South | BO      | Bo Town      | Swine | Large white | Farm bush | Stable | Herd | 04.06.2017 | 80     | F | 8  |
| SL 2017-644 |         |     | 0.16 | neg | South | BO      | Bo Town      | Swine | Large white | Farm bush | Stable | Herd | 04.06.2017 | 80     | F | 8  |
| SL 2017-645 |         |     | 0.13 | neg | South | BO      | Bo Town      | Swine | Duroc       | Farm bush | Stable | Herd | 04.06.2017 | 80     | M | 9  |
| SL 2017-646 |         |     | 0.13 | neg | South | BO      | Bo Town      | Swine | Duroc       | Farm bush | Stable | Herd | 04.06.2017 | 80     | M | 9  |
| SL 2017-647 |         |     | 0.12 | neg | South | BO      | Bo Town      | Swine | Duroc       | Farm bush | Stable | Herd | 04.06.2017 | 80     | M | 9  |
| SL 2017-648 | Pool 50 | neg | 0.13 | neg | South | BO      | Bo Town      | Swine | Large white | Farm bush | Stable | Herd | 04.06.2017 | 80     | M | 10 |
| SL 2017-649 |         |     | 0.15 | neg | South | BO      | Bo Town      | Swine | Duroc       | Farm bush | Stable | Herd | 04.06.2017 | 80     | M | 10 |
| SL 2017-650 |         |     | 0.15 | neg | South | BO      | Bo Town      | Swine | Duroc       | Farm bush | Stable | Herd | 04.06.2017 | 80     | M | 10 |
| SL 2017-661 |         |     | 0.30 | neg | South | Mayamba | Bambobu      | Swine | Large white | Farm bush | Stable | Herd | 12.06.2017 |        | F | 60 |
| SL 2017-662 |         |     | 0.18 | neg | South | Mayamba | Bambobu      | Swine | Large white | Farm bush | Stable | Herd | 12.06.2017 |        | F | 60 |
| SL 2017-663 | Pool 51 | neg | 0.23 | neg | South | Mayamba | Mojaka       | Swine | Large white | Farm bush | Stable | Herd | 12.06.2017 |        | F | 36 |
| SL 2017-664 |         |     | 0.22 | neg | South | Mayamba | Mojaka       | Swine | Large white | Farm bush | Stable | Herd | 12.06.2017 |        | F | 24 |
| SL 2017-665 |         |     | 0.20 | neg | South | Mayamba | Mojaka       | Swine | Large white | Farm bush | Stable | Herd | 12.06.2017 |        | F | 24 |
| SL 2017-666 |         |     | 0.15 | neg | South | Mayamba | Mojaka       | Swine | Large white | Farm bush | Stable | Herd | 12.06.2017 |        | F | 72 |
| SL 2017-667 |         |     | 0.21 | neg | South | Mayamba | Mojaka       | Swine | Large white | Farm bush | Stable | Herd | 12.06.2017 |        | F | 72 |
| SL 2017-668 | Pool 52 | neg | 0.19 | neg | South | Mayamba | Levuma WAD   | Swine | Large white | Farm bush | Stable | Herd | 12.06.2017 |        | F | 12 |
| SL 2017-669 |         |     | 0.15 | neg | South | Mayamba | Levuma WAD   | Swine | Large white | Farm bush | Stable | Herd | 12.06.2017 |        | F | 20 |
| SL 2017-670 |         |     | 0.15 | neg | South | Mayamba | Levuma WAD   | Swine | Large white | Farm bush | Stable | Herd | 12.06.2017 |        | M | 16 |
| SL 2017-671 |         |     | 0.13 | neg | South | Mayamba | Levuma WAD   | Swine | Large white | Farm bush | Stable | Herd | 12.06.2017 |        | M | 19 |
| SL 2017-672 |         |     | 0.14 | neg | South | Mayamba | Levuma WAD   | Swine | Large white | Farm bush | Stable | Herd | 12.06.2017 |        | M | 21 |
| SL 2017-673 | Pool 53 | neg | 0.19 | neg | South | Mayamba | Levuma WAD   | Swine | Large white | Farm bush | Stable | Herd | 12.06.2017 |        | M | 26 |
| SL 2017-674 |         |     | 0.31 | neg | South | Mayamba | Levuma WAD   | Swine | Large white | Farm bush | Stable | Herd | 12.06.2017 |        | F | 40 |
| SL 2017-675 |         |     | 0.38 | neg | South | Mayamba | Levuma WAD   | Swine | Large white | Farm bush | Stable | Herd | 12.06.2017 |        | F | 36 |
| SL 2017-676 |         |     | 0.34 | neg | South | Mayamba | Levuma WAD   | Swine | Large white | Farm bush | Stable | Herd | 12.06.2017 |        | F | 36 |
| SL 2017-677 |         |     | 0.28 | neg | South | Mayamba | Levuma WAD   | Swine | Large white | Farm bush | Stable | Herd | 12.06.2017 |        | F | 48 |
| SL 2017-678 | Pool 54 | neg | 0.23 | neg | South | Mayamba | Levuma WAD   | Swine | Large white | Farm bush | Stable | Herd | 12.06.2017 |        | F | 36 |
| SL 2017-679 |         |     | 0.16 | neg | South | Mayamba | Levuma WAD   | Swine | Large white | Farm bush | Stable | Herd | 12.06.2017 |        | F | 12 |
| SL 2017-680 |         |     | 0.18 | neg | South | Mayamba | Levuma WAD   | Swine | Large white | Farm bush | Stable | Herd | 12.06.2017 |        | M | 9  |
| SL 2017-681 |         |     | 0.19 | neg | South | Mayamba | Levuma WAD   | Swine | Large white | Farm bush | Stable | Herd | 12.06.2017 |        | F | 12 |
| SL 2017-682 |         |     | 0.16 | neg | South | Mayamba | Levuma WAD   | Swine | Large white | Farm bush | Stable | Herd | 12.06.2017 |        | M | 12 |
| SL 2017-683 | Pool 55 | neg | 0.14 | neg | South | Mayamba | Levuma WAD   | Swine | Large white | Farm bush | Stable | Herd | 12.06.2017 |        | F | 7  |
| SL 2017-684 |         |     | 0.18 | neg | South | Mayamba | Levuma WAD   | Swine | Large white | Farm bush | Stable | Herd | 12.06.2017 |        | M | 7  |
| SL 2017-685 |         |     | 0.17 | neg | South | Mayamba | Levuma WAD   | Swine | Large white | Farm bush | Stable | Herd | 12.06.2017 |        | M | 12 |
| SL 2017-686 |         |     | 0.19 | neg | South | Mayamba | Levuma WAD   | Swine | Large white | Farm bush | Stable | Herd | 12.06.2017 |        | F | 36 |
| SL 2017-687 |         |     | 0.20 | neg | South | Mayamba | Levuma WAD   | Swine | Large white | Farm bush | Stable | Herd | 12.06.2017 |        | F | 18 |
| SL 2017-688 | Pool 56 | neg | 0.11 | neg | South | Mayamba | Lungi        | Swine | Large white | Farm bush | Stable | Herd | 12.06.2017 |        | M | 7  |
| SL 2017-689 |         |     | 0.25 | neg | South | Mayamba | Lungi        | Swine | Large white | Farm bush | Stable | Herd | 12.06.2017 |        | F | 12 |
| SL 2017-690 |         |     | 0.16 | neg | South | Mayamba | Lungi        | Swine | Large white | Farm bush | Stable | Herd | 12.06.2017 |        | M | 8  |
| SL 2017-691 |         |     | 0.15 | neg | South | Mayamba | Lungi        | Swine | Large white | Farm bush | Stable | Herd | 12.06.2017 |        | M | 6  |
| SL 2017-692 |         |     | 0.25 | neg | South | Mayamba | Lungi        | Swine | Large white | Farm bush | Stable | Herd | 12.06.2017 |        | M | 6  |
| SL 2017-693 | Pool 57 | neg | 0.27 | neg | South | Mayamba | Lungi        | Swine | Large white | Farm bush | Stable | Herd | 12.06.2017 |        | F | 12 |
| SL 2017-694 |         |     | 0.18 | neg | South | Mayamba | Lungi        | Swine | Large white | Farm bush | Stable | Herd | 12.06.2017 |        | F | 9  |
| SL 2017-695 |         | pos | 0.07 | pos | South | Mayamba | Lungi        | Swine | Large white | Farm bush | Stable | Herd | 12.06.2017 |        | F | 24 |
| SL 2017-696 |         |     | 0.21 | neg | South | Mayamba | Lungi        | Swine | Large white | Farm bush | Stable | Herd | 12.06.2017 |        | F | 18 |
| SL 2017-697 |         |     | 0.14 | neg | South | Mayamba | Lungi        | Swine | Large white | Farm bush | Stable | Herd | 12.06.2017 |        | M | 24 |
| SL 2017-698 | Pool 58 | neg | 0.25 | neg | South | Mayamba | Lungi        | Swine | Large white | Farm bush | Stable | Herd | 12.06.2017 |        | F | 24 |
| SL 2017-699 |         |     | 0.24 | neg | South | Mayamba | Lungi        | Swine | Large white | Farm bush | Stable | Herd | 12.06.2017 |        | F | 24 |
| SL 2017-700 |         |     | 0.20 | neg | South | Mayamba | Lungi        | Swine | Large white | Farm bush | Stable | Herd | 12.06.2017 |        | F | 24 |
| SL 2017-701 |         |     | 0.13 | neg | South | Mayamba | Lungi        | Swine | Large white | Farm bush | Stable | Herd | 12.06.2017 |        | F | 6  |
| SL 2017-702 | Pool 59 | neg | 0.14 | neg | South | Mayamba | Lungi        | Swine | Large white | Farm bush | Stable | Herd | 12.06.2017 |        | F | 6  |
| SL 2017-703 |         |     | 0.24 | neg | South | Mayamba | Lungi        | Swine | Large white | Farm bush | Stable | Herd | 12.06.2017 |        | F | 18 |
| SL 2017-704 |         |     | 0.21 | neg | South | Mayamba | Lungi        | Swine | Large white | Farm bush | Stable | Herd | 12.06.2017 |        | F | 18 |
| SL 2017-705 |         |     | 0.15 | neg | South | Mayamba | Mayamba Town | Swine | Large white | Farm bush | Stable | Herd | 12.06.2017 |        | F | 8  |
| SL 2017-706 |         |     | 0.11 | neg | South | Mayamba | Mayamba Town | Swine | Large white | Farm bush | Stable | Herd | 12.06.2017 |        | M | 8  |
| SL 2017-707 |         |     | 0.14 | neg | South | Mayamba | Mayamba Town | Swine | Large white | Farm bush | Stable | Herd | 12.06.2017 |        | M | 8  |
| SL 2017-708 | Pool 60 | neg | 0.17 | neg | South | Mayamba | Mayamba Town | Swine | Large white | Farm bush | Stable | Herd | 12.06.2017 |        | M | 6  |
| SL 2017-709 |         |     | 0.14 | neg | South | Mayamba | Mayamba Town | Swine | Large white | Farm bush | Stable | Herd | 12.06.2017 |        | M | 6  |
| SL 2017-710 |         |     | 0.13 | neg | South | Mayamba | Mayamba Town | Swine | Large white | Farm bush | Stable | Herd | 12.06.2017 |        | M | 6  |
| SL 2017-711 |         |     | 0.11 | neg | South | Mayamba | Mayamba Town | Swine | Large white | Farm bush | Stable | Herd | 12.06.2017 |        | F | 6  |
| SL 2017-712 |         |     | 0.13 | neg | South | Mayamba | Mayamba Town | Swine | Large white | Farm bush | Stable | Herd | 12.06.2017 |        | M | 6  |
| SL 2017-713 | Pool 61 | neg | 0.12 | neg | South | Mayamba | Mayamba Town | Swine | Large white | Farm bush | Stable | Herd | 12.06.2017 |        | F | 8  |
| SL 2017-714 |         |     | 0.12 | neg | South | Mayamba | Mayamba Town | Swine | Large white | Farm bush | Stable | Herd | 12.06.2017 |        | F | 8  |
| SL 2017-715 |         |     | 0.12 | neg | South | Mayamba | Mayamba Town | Swine | Large white | Farm bush | Stable | Herd | 12.06.2017 |        | F | 8  |
| SL 2017-716 |         |     | 0.11 | neg | South | Mayamba | Mayamba Town | Swine | Large white | Farm bush | Stable | Herd | 12.06.2017 |        | F | 12 |
| SL 2017-717 |         |     | 0.12 | neg | South | Mayamba | Mayamba Town | Swine | Large white | Farm bush | Stable | Herd | 12.06.2017 |        | F | 12 |
| SL 2017-718 | Pool 62 | neg | 0.12 | neg | South | Mayamba | Mayamba Town | Swine | Large white | Farm bush | Stable | Herd | 12.06.2017 |        | F | 6  |
| SL 2017-719 |         |     | 0.11 | neg | South | Mayamba | Mayamba Town | Swine | Large white | Farm bush | Stable | Herd | 12.06.2017 |        | F | 12 |
| SL 2017-720 |         |     | 0.19 | neg | South | Mayamba | Mayamba Town | Swine | Large white | Farm bush | Stable | Herd | 12.06.2017 |        | F | 12 |
| SL 2017-721 |         |     | 0.13 | neg | South | Mayamba | Mayamba Town | Swine | Large white | Farm bush | Stable | Herd | 12.06.2017 |        | F | 6  |
| SL 2017-722 |         |     | 0.15 | neg | South | Mayamba | Mayamba Town | Swine | Large white | Farm bush | Stable | Herd | 12.06.2017 |        | F | 6  |
| SL 2017-723 | Pool 63 | neg | 0.12 | neg | South | Mayamba | Mayamba Town | Swine | Large white | Farm bush | Stable | Herd | 12.06.2017 |        | F | 8  |
| SL 2017-724 |         |     | 0.17 | neg | South | Mayamba | Mayamba Town | Swine | Large white | Farm bush | Stable | Herd | 12.06.2017 |        | F | 6  |
| SL 2017-725 |         |     | 0.15 | neg | South | Mayamba | Mayamba Town | Swine | Large white | Farm bush | Stable | Herd | 12.06.2017 |        | F | 9  |
| SL 2017-726 |         |     | 0.15 | neg | South | Mayamba | Mayamba Town | Swine | Large white | Farm bush | Stable | Herd | 12.06.2017 |        | F | 9  |
| SL 2017-727 |         |     | 0.11 | neg | South | Mayamba | Mayamba Town | Swine | Large white | Farm bush | Stable | Herd | 12.06.2017 |        | F | 12 |
| SL 2017-728 | Pool 64 | neg | 0.11 | neg | South | Mayamba | Mayamba Town | Swine | Large white | Farm bush | Stable | Herd | 12.06.2017 |        | F | 12 |
| SL 2017-729 |         |     | 0.12 | neg | South | Mayamba | Mayamba Town | Swine | Large white | Farm bush | Stable | Herd | 12.06.2017 |        | M | 12 |
| SL 2017-730 |         |     | 0.11 | neg | South | Mayamba | Mayamba Town | Swine | Large white | Farm bush | Stable | Herd | 12.06.2017 |        | M | 12 |
| SL 2017-731 |         |     | 0.10 | neg | South | Mayamba | Mayamba Town | Swine | Large white | Farm bush | Stable | Herd | 12.06.2017 |        | M | 12 |
| SL 2017-732 | Pool 65 | neg | 0.16 | neg | South | Mayamba | Mayamba Town | Swine | Large white | Farm bush | Stable | Herd | 12.06.2017 |        | M | 6  |
| SL 2017-733 |         |     | 0.17 | neg | South | Mayamba | Mayamba Town | Swine | Large white | Farm bush | Stable | Herd | 12.06.2017 |        | M | 6  |
| SL 2017-734 |         |     | 0.14 | neg | South | Mayamba | Mayamba Town | Swine | Large white | Farm bush | Stable | Herd | 12.06.2017 |        | M | 6  |
| SL 2017-735 |         |     | 0.12 | neg | South | Mayamba | Mayamba Town | Swine | Large white | Farm bush | Stable | Herd | 12.06.2017 |        | M | 6  |
| SL 2017-736 |         |     | 0.14 | neg | South | Mayamba | Mayamba Town | Swine | Large white | Farm bush | Stable | Herd | 12.06.2017 | Bonthe | F | 6  |
| SL 2017-737 |         |     | 0.15 | neg | South | Mayamba | Mayamba Town | Swine | Large white | Farm bush | Stable | Herd | 12.06.2017 | Bonthe | F | 6  |

|             |         |     |      |     |       |         |              |       |                   |           |            |      |            |                 |      |    |    |
|-------------|---------|-----|------|-----|-------|---------|--------------|-------|-------------------|-----------|------------|------|------------|-----------------|------|----|----|
| SL 2017-739 | Pool 66 | neg | 0.14 | neg | South | Mayamba | Mayamba Town | Swine | Large white       | Farm bush | Stable     | Herd | 12.06.2017 | Bonthe          | F    | 6  |    |
| SL 2017-739 |         |     | 0.14 | neg | South | Mayamba | Mayamba Town | Swine | Large white       | Farm bush | Stable     | Herd | 12.06.2017 | Bonthe          | M    | 6  |    |
| SL 2017-740 |         |     | 0.13 | neg | South | Mayamba | Mayamba Town | Swine | Large white       | Farm bush | Stable     | Herd | 12.06.2017 | Bonthe          | M    | 8  |    |
| SL 2017-741 |         |     | 0.12 | neg | South | Mayamba | Mayamba Town | Swine | Large white       | Farm bush | Stable     | Herd | 12.06.2017 | Bonthe          | F    | 7  |    |
| SL 2017-742 | Pool 67 | neg | 0.13 | neg | South | Mayamba | Mayamba Town | Swine | Large white       | Farm bush | Stable     | Herd | 12.06.2017 | Bonthe          | F    | 8  |    |
| SL 2017-743 |         |     | 0.22 | neg | South | Mayamba | Mayamba Town | Swine | Large white       | Farm bush | Stable     | Herd | 12.06.2017 | Bonthe          | F    | 7  |    |
| SL 2017-744 |         |     | 0.13 | neg | South | Mayamba | Mayamba Town | Swine | Large white       | Farm bush | Stable     | Herd | 12.06.2017 | Bonthe          | F    | 7  |    |
| SL 2017-745 |         |     | 0.12 | neg | South | Mayamba | Mayamba Town | Swine | Large white       | Farm bush | Stable     | Herd | 12.06.2017 | Bonthe          | M    | 7  |    |
| SL 2017-746 | Pool 68 | neg | 0.15 | neg | South | Mayamba | Mayamba Town | Swine | Large white       | Farm bush | Stable     | Herd | 12.06.2017 | Bonthe          | M    | 7  |    |
| SL 2017-747 |         |     | 0.15 | neg | South | Mayamba | Mayamba Town | Swine | Large white       | Farm bush | Stable     | Herd | 12.06.2017 | Bonthe          | F    | 6  |    |
| SL 2017-748 |         |     | 0.14 | neg | South | Mayamba | Mayamba Town | Swine | Large white       | Farm bush | Stable     | Herd | 12.06.2017 | Bonthe          | F    | 6  |    |
| SL 2017-749 |         |     | 0.13 | neg | South | Mayamba | Mayamba Town | Swine | Large white       | Farm bush | Stable     | Herd | 12.06.2017 | Bonthe          | F    | 12 |    |
| SL 2017-750 | Pool 69 | neg | 0.13 | neg | South | Mayamba | Mayamba Town | Swine | Large white       | Farm bush | Stable     | Herd | 12.06.2017 | Bonthe          | F    | 12 |    |
| SL 2017-751 |         |     | 0.13 | neg | South | Mayamba | Mayamba Town | Swine | Large white       | Farm bush | Stable     | Herd | 12.06.2017 | Bonthe          | M    | 21 |    |
| SL 2017-752 |         |     | 0.17 | neg | South | Mayamba | Mayamba Town | Swine | Large white       | Farm bush | Stable     | Herd | 12.06.2017 | Bonthe          | F    | 24 |    |
| SL 2017-753 |         |     | 0.13 | neg | South | Mayamba | Mayamba Town | Swine | Large white       | Farm bush | Stable     | Herd | 12.06.2017 | Bonthe          | F    | 24 |    |
| SL 2017-754 | Pool 70 | neg | 0.15 | neg | South | Mayamba | Mayamba Town | Swine | Large white       | Farm bush | Stable     | Herd | 12.06.2017 | Bonthe          | M    | 24 |    |
| SL 2017-755 |         |     | 0.14 | neg | South | Mayamba | Mayamba Town | Swine | Large white       | Farm bush | Stable     | Herd | 12.06.2017 | Bonthe          | M    | 18 |    |
| SL 2017-756 |         |     | 0.14 | neg | South | Mayamba | Mayamba Town | Swine | Large white       | Farm bush | Stable     | Herd | 12.06.2017 | Bonthe          | M    | 12 |    |
| SL 2017-757 |         |     | 0.19 | neg | South | Mayamba | Mayamba Town | Swine | Large white       | Farm bush | Stable     | Herd | 12.06.2017 | Bonthe          | F    | 12 |    |
| SL 2017-758 | Pool 71 | neg | 0.18 | neg | South | Mayamba | Mayamba Town | Swine | Large white       | Farm bush | Stable     | Herd | 12.06.2017 | Bonthe          | F    | 12 |    |
| SL 2017-759 |         |     | 0.14 | neg | South | Mayamba | Mayamba Town | Swine | Large white       | Farm bush | Stable     | Herd | 12.06.2017 | Bonthe          | F    | 12 |    |
| SL 2017-760 |         |     | 0.19 | neg | South | Mayamba | Mayamba Town | Swine | Large white       | Farm bush | Stable     | Herd | 12.06.2017 | Bonthe          | F    | 18 |    |
| SL 2017-761 |         |     | 0.15 | neg | South | Mayamba | Mayamba Town | Swine | Large white       | Farm bush | Stable     | Herd | 12.06.2017 | Bonthe          | M    | 18 |    |
| SL 2017-762 | Pool 72 | neg | 0.11 | neg | South | Mayamba | Mayamba Town | Swine | Large white       | Farm bush | Stable     | Herd | 12.06.2017 | Bonthe          | M    | 18 |    |
| SL 2017-763 |         |     | 0.18 | neg | South | Mayamba | Mayamba Town | Swine | Large white       | Farm bush | Stable     | Herd | 12.06.2017 | Bonthe          | F    | 6  |    |
| SL 2017-764 |         |     | 0.13 | neg | South | Mayamba | Mayamba Town | Swine | Large white       | Farm bush | Stable     | Herd | 12.06.2017 | Bonthe          | F    | 6  |    |
| SL 2017-765 |         |     | 0.22 | neg | South | Mayamba | Mayamba Town | Swine | Large white       | Farm bush | Stable     | Herd | 12.06.2017 | Bonthe          | F    | 6  |    |
| SL 2017-766 | Pool 73 | neg | 0.56 | neg | South | Mayamba | Mayamba Town | Swine | Large white       | Farm bush | Stable     | Herd | 12.06.2017 | Bonthe          | M    | 6  |    |
| SL 2017-767 |         |     | 0.35 | neg | South | Mayamba | Mayamba Town | Swine | Large white       | Farm bush | Stable     | Herd | 12.06.2017 | Bonthe          | F    | 6  |    |
| SL 2017-768 |         |     | 0.18 | neg | South | Mayamba | Mayamba Town | Swine | Large white       | Farm bush | Stable     | Herd | 12.06.2017 | Bonthe          | F    | 12 |    |
| SL 2017-769 |         |     | 0.23 | neg | South | Mayamba | Mokorewo     | Swine | West Africa Duroc | Farm bush | stationary | Herd | 15.07.2017 | Buya town       | F    | 3  |    |
| SL 2017-770 | Pool 74 | neg | 0.35 | neg | South | Mayamba | Mokorewo     | Swine | West Africa Duroc | Farm bush | stationary | Herd | 15.07.2017 | Buya town       | F    | 3  |    |
| SL 2017-771 |         |     | 0.36 | neg | South | Mayamba | Mokorewo     | Swine | West Africa Duroc | Farm bush | stationary | Herd | 15.07.2017 | Buya town       | F    | 3  |    |
| SL 2017-772 |         |     | 0.20 | neg | South | Mayamba | Mokorewo     | Swine | West Africa Duroc | Farm bush | stationary | Herd | 15.07.2017 | Buya town       | M    | 3  |    |
| SL 2017-773 |         |     | 0.22 | neg | South | Mayamba | Mokorewo     | Swine | West Africa Duroc | Farm bush | stationary | Herd | 15.07.2017 | Buya town       | F    | 3  |    |
| SL 2017-774 | Pool 75 | neg | 0.19 | neg | South | Mayamba | Mokorewo     | Swine | West Africa Duroc | Farm bush | stationary | Herd | 15.07.2017 | Buya town       | F    | 3  |    |
| SL 2017-775 |         |     | 0.18 | neg | South | Mayamba | Mokorewo     | Swine | West Africa Duroc | Farm bush | stationary | Herd | 15.07.2017 | Buya town       | F    | 3  |    |
| SL 2017-776 |         |     | 0.20 | neg | South | Mayamba | Mokorewo     | Swine | West Africa Duroc | Farm bush | stationary | Herd | 15.07.2017 | Buya town       | M    | 3  |    |
| SL 2017-777 |         |     | 0.22 | neg | South | Mayamba | Mokorewo     | Swine | West Africa Duroc | Farm bush | stationary | Herd | 15.07.2017 | Buya town       | F    | 3  |    |
| SL 2017-778 | Pool 76 | neg | 0.19 | neg | South | Mayamba | Mokorewo     | Swine | West Africa Duroc | Farm bush | stationary | Herd | 15.07.2017 | Buya town       | M    | 3  |    |
| SL 2017-779 |         |     | 0.26 | neg | South | Mayamba | Mokorewo     | Swine | West Africa Duroc | Farm bush | stationary | Herd | 15.07.2017 | Buya town       | F    | 8  |    |
| SL 2017-780 |         |     | 0.37 | neg | South | Mayamba | Mokorewo     | Swine | West Africa Duroc | Farm bush | stationary | Herd | 15.07.2017 | Buya town       | F    | 8  |    |
| SL 2017-781 |         |     | 0.41 | neg | South | Mayamba | Mokorewo     | Swine | Large white       | Farm bush | stationary | Herd | 15.07.2017 | Buya town       | M    | 8  |    |
| SL 2017-782 | Pool 77 | neg | 0.33 | neg | South | Mayamba | Mokorewo     | Swine | Large white       | Farm bush | stationary | Herd | 15.07.2017 | Buya town       | M    | 24 |    |
| SL 2017-783 |         |     | 0.18 | neg | South | Mayamba | Mayamba Town | Swine | Large white       | Farm bush | stationary | Herd | 15.07.2017 | Buya town       | F    | 3  |    |
| SL 2017-784 |         |     | 0.19 | neg | South | Mayamba | Mayamba Town | Swine | Large white       | Farm bush | stationary | Herd | 15.07.2017 | Buya town       | M    | 3  |    |
| SL 2017-785 |         |     | 0.19 | neg | South | Mayamba | Mayamba Town | Swine | Large white       | Farm bush | stationary | Herd | 15.07.2017 | Buya town       | M    | 3  |    |
| SL 2017-786 | Pool 78 | neg | 0.19 | neg | South | Mayamba | Mayamba Town | Swine | Large white       | Farm bush | stationary | Herd | 15.07.2017 | Buya town       | M    | 3  |    |
| SL 2017-787 |         |     | 0.21 | neg | South | Mayamba | Mayamba Town | Swine | Large white       | Farm bush | stationary | Herd | 15.07.2017 | Buya town       | M    | 3  |    |
| SL 2017-788 |         |     | 0.34 | neg | South | Mayamba | Mayamba Town | Swine | Large white       | Farm bush | stationary | Herd | 15.07.2017 | Buya town       | M    | 24 |    |
| SL 2017-789 |         |     | 0.45 | neg | South | Mayamba | Mayamba Town | Swine | Large white       | Farm bush | stationary | Herd | 15.07.2017 | Buya town       | F    | 24 |    |
| SL 2017-790 | Pool 79 | neg | 0.22 | neg | South | Mayamba | Mayamba Town | Swine | Large white       | Farm bush | stationary | Herd | 15.07.2017 | Buya town       | F    | 24 |    |
| SL 2017-791 |         |     | 0.17 | neg | South | Mayamba | Mayamba Town | Swine | Large white       | Farm bush | stationary | Herd | 15.07.2017 | Buya town       | M    | 5  |    |
| SL 2017-792 |         |     | 0.18 | neg | South | Mayamba | Mayamba Town | Swine | Large white       | Farm bush | stationary | Herd | 15.07.2017 | Buya town       | M    | 3  |    |
| SL 2017-793 |         |     | 0.18 | neg | South | Mayamba | Mayamba Town | Swine | Large white       | Farm bush | stationary | Herd | 15.07.2017 | Buya town       | M    | 3  |    |
| SL 2017-794 | Pool 80 | neg | 0.18 | neg | South | Mayamba | Mayamba Town | Swine | Large white       | Farm bush | stationary | Herd | 15.07.2017 | Buya town       | F    | 3  |    |
| SL 2017-795 |         |     | 0.18 | neg | South | Mayamba | Mayamba Town | Swine | Large white       | Farm bush | stationary | Herd | 15.07.2017 | Buya town       | F    | 3  |    |
| SL 2017-796 |         |     | 0.25 | neg | South | Mayamba | Mayamba Town | Swine | Large white       | Farm bush | stationary | Herd | 15.07.2017 | Buya town       | F    | 24 |    |
| SL 2017-797 |         |     | 0.45 | neg | South | Mayamba | Mokojo       | Swine | West Africa Duroc | Farm bush | stationary | Herd | 15.07.2017 | Buya town       | F    | 8  |    |
| SL 2017-798 | Pool 81 | neg | 0.24 | neg | South | Mayamba | Mokojo       | Swine | West Africa Duroc | Farm bush | stationary | Herd | 15.07.2017 | Buya town       | M    | 8  |    |
| SL 2017-799 |         |     | 0.33 | neg | South | Mayamba | Mokojo       | Swine | West Africa Duroc | Farm bush | stationary | Herd | 15.07.2017 | Buya town       | M    | 8  |    |
| SL 2017-800 |         |     | 0.32 | neg | South | Mayamba | Mokojo       | Swine | West Africa Duroc | Farm bush | stationary | Herd | 15.07.2017 | Buya town       | F    | 8  |    |
| SL 2017-801 |         |     | 0.78 | pos | South | Mayamba | Mokojo       | Swine | West Africa Duroc | Farm bush | stationary | Herd | 15.07.2017 | Buya town       | F    | 8  |    |
| SL 2017-802 | Pool 82 | neg | 0.22 | neg | South | Mayamba | Mokojo       | Swine | West Africa Duroc | Farm bush | stationary | Herd | 15.07.2017 | Buya town       | M    | 8  |    |
| SL 2017-803 |         |     | 0.26 | neg | South | Mayamba | Mokojo       | Swine | West Africa Duroc | Farm bush | stationary | Herd | 15.07.2017 | Buya town       | F    | 8  |    |
| SL 2017-804 |         |     | 0.26 | neg | South | Mayamba | Mokojo       | Swine | West Africa Duroc | Farm bush | stationary | Herd | 15.07.2017 | Buya town       | F    | 8  |    |
| SL 2017-805 |         |     | 0.26 | neg | South | Mayamba | Mokojo       | Swine | West Africa Duroc | Farm bush | stationary | Herd | 15.07.2017 | Buya town       | F    | 8  |    |
| SL 2017-806 | Pool 83 | neg | 0.28 | neg | South | Mayamba | Mokojo       | Swine | West Africa Duroc | Farm bush | stationary | Herd | 15.07.2017 | Buya town       | F    | 8  |    |
| SL 2017-807 |         |     | 0.29 | neg | South | Mayamba | Mokojo       | Swine | West Africa Duroc | Farm bush | stationary | Herd | 15.07.2017 | Buya town       | F    | 8  |    |
| SL 2017-808 |         |     | 0.20 | neg | South | Mayamba | Mortenne     | Swine | West Africa Duroc | Farm bush | stationary | Herd | 15.07.2017 | Yoyema          | F    | 5  |    |
| SL 2017-809 |         |     | 0.24 | neg | South | Mayamba | Mortenne     | Swine | West Africa Duroc | Farm bush | stationary | Herd | 15.07.2017 | Yoyema          | M    | 7  |    |
| SL 2017-810 | Pool 84 | neg | 0.29 | neg | South | Mayamba | Mortenne     | Swine | West Africa Duroc | Farm bush | stationary | Herd | 15.07.2017 | Yoyema          | F    | 6  |    |
| SL 2017-811 |         |     | 0.20 | neg | South | Mayamba | Mayamba Town | Swine | West Africa Duroc | Farm bush | stationary | Herd | 15.07.2017 | Nigobhuni       | F    | 6  |    |
| SL 2017-812 |         |     | 0.20 | neg | South | Mayamba | Mayamba Town | Swine | West Africa Duroc | Farm bush | stationary | Herd | 15.07.2017 | Nigobhuni       | Herd | F  | 24 |
| SL 2017-813 |         |     | 0.36 | neg | South | Mayamba | Mayamba Town | Swine | West Africa Duroc | Farm bush | stationary | Herd | 15.07.2017 | Nigobhuni       | F    | 24 |    |
| SL 2017-814 | Pool 85 | neg | 0.22 | neg | South | Mayamba | Limba Corner | Swine | West Africa Duroc | Farm bush | stationary | Herd | 16.07.2017 | Wonde Mokolonde | F    | 8  |    |
| SL 2017-815 |         |     | 0.37 | neg | South | Mayamba | Limba Corner | Swine | West Africa Duroc | Farm bush | stationary | Herd | 16.07.2017 | Wonde Mokolonde | F    | 8  |    |
| SL 2017-816 |         |     | 0.41 | neg | South | Mayamba | Limba Corner | Swine | West Africa Duroc | Farm bush | stationary | Herd | 16.07.2017 | Wonde Mokolonde | M    | 8  |    |
| SL 2017-817 |         |     | 0.24 | neg | South | Mayamba | Limba Corner | Swine | West Africa Duroc | Farm bush | stationary | Herd | 16.07.2017 | Wonde Mokolonde | F    | 6  |    |
| SL 2017-818 | Pool 86 | neg | 0.23 | neg | South | Mayamba | Limba Corner | Swine | West Africa Duroc | Farm bush | stationary | Herd | 16.07.2017 | Wonde Mokolonde | F    | 10 |    |
| SL 2017-819 |         |     | 0.25 | neg | South | Mayamba | Limba Corner | Swine | West Africa Duroc | Farm bush | stationary | Herd | 16.07.2017 | Wonde Mokolonde | F    | 10 |    |
| SL 2017-820 |         |     | 0.21 | neg | South | Mayamba | Limba Corner | Swine | West Africa Duroc | Farm bush | stationary | Herd | 16.07.2017 | Wonde Mokolonde | F    | 12 |    |
| SL 2017-821 |         |     | 0.29 | neg | South | Mayamba | Limba Corner | Swine | West Africa Duroc | Farm bush | stationary | Herd | 16.07.2017 | Wonde Mokolonde | M    | 10 |    |
| SL 2017-822 | Pool 87 | neg | 0.31 | neg | South | Mayamba | Limba Corner | Swine | West Africa Duroc | Farm bush | stationary | Herd | 16.07.2017 | Wonde Mokolonde | M    | 3  |    |
| SL 2017-823 |         |     | 0.28 | neg | South | Mayamba | Limba Corner | Swine | West Africa Duroc | Farm bush | stationary | Herd | 16.07.2017 | Wonde Mokolonde | M    | 3  |    |
| SL 2017-824 |         |     | 0.15 | neg | South | Mayamba | Limba Corner | Swine | West Africa Duroc | Farm bush | stationary | Herd | 16.07.2017 | Wonde Mokolonde | M    | 3  |    |
| SL 2017-825 |         |     | 0.29 | neg | South | Mayamba | Limba Corner | Swine | West Africa Duroc | Farm bush | stationary | Herd | 16.07.2017 | Wonde Mokolonde | F    | 3  |    |
| SL 2017-826 |         |     | 0.18 | neg | South | Mayamba | Limba Corner | Swine | West Africa Duroc | Farm bush | stationary | Herd | 16.07.2017 | Wonde Mokolonde | M    | 3  |    |

|             |          |     |      |     |       |         |              |       |                   |           |            |      |            |               |   |    |
|-------------|----------|-----|------|-----|-------|---------|--------------|-------|-------------------|-----------|------------|------|------------|---------------|---|----|
| SL 2017-827 | Pool 84  | neg | 0.20 | neg | South | Mayamba | Limba Corner | Swine | West Africa Duroc | Farm bush | stationary | Herd | 16.07.2017 | Wonde Malonde | F | 3  |
| SL 2017-828 |          |     | 0.23 | neg | South | Mayamba | Mowato       | Swine | West Africa Duroc | Farm bush | stationary | Herd | 16.07.2017 | Mowoto        | M | 5  |
| SL 2017-829 |          |     | 0.31 | neg | South | Mayamba | Mowato       | Swine | West Africa Duroc | Farm bush | stationary | Herd | 16.07.2017 | Mowoto        | F | 5  |
| SL 2017-830 |          |     | 0.24 | neg | South | Mayamba | Mowato       | Swine | West Africa Duroc | Farm bush | stationary | Herd | 16.07.2017 | Mowoto        | F | 6  |
| SL 2017-831 | Pool 85  | neg | 0.41 | neg | South | Mayamba | Mowato       | Swine | West Africa Duroc | Farm bush | stationary | Herd | 16.07.2017 | Mowoto        | F | 6  |
| SL 2017-832 |          |     | 0.22 | neg | South | Mayamba | Mowato       | Swine | West Africa Duroc | Farm bush | stationary | Herd | 16.07.2017 | Mowoto        | F | 12 |
| SL 2017-833 |          |     | 0.29 | neg | South | Mayamba | Mowato       | Swine | West Africa Duroc | Farm bush | stationary | Herd | 16.07.2017 | Mowoto        | M | 6  |
| SL 2017-834 |          |     | 0.30 | neg | South | Mayamba | Mowato       | Swine | West Africa Duroc | Farm bush | stationary | Herd | 16.07.2017 | Mowoto        | F | 6  |
| SL 2017-835 | Pool 86  | neg | 0.65 | neg | South | Mayamba | Mowato       | Swine | West Africa Duroc | Farm bush | stationary | Herd | 16.07.2017 | Mowoto        | F | 12 |
| SL 2017-836 |          |     | 0.25 | neg | South | Mayamba | Mowato       | Swine | West Africa Duroc | Farm bush | stationary | Herd | 16.07.2017 | Mowoto        | F | 14 |
| SL 2017-837 |          |     | 0.29 | neg | South | Mayamba | Mowato       | Swine | West Africa Duroc | Farm bush | stationary | Herd | 16.07.2017 | Mowoto        | F | 14 |
| SL 2017-838 |          |     | 0.24 | neg | South | Mayamba | Mowato       | Swine | West Africa Duroc | Farm bush | stationary | Herd | 16.07.2017 | Mowoto        | F | 3  |
| SL 2017-839 | Pool 87  | neg | 0.41 | neg | South | Mayamba | Mowato       | Swine | West Africa Duroc | Farm bush | stationary | Herd | 16.07.2017 | Mowoto        | F | 12 |
| SL 2017-840 |          |     | 0.22 | neg | South | Mayamba | Mowato       | Swine | West Africa Duroc | Farm bush | stationary | Herd | 16.07.2017 | Mowoto        | F | 3  |
| SL 2017-841 |          |     | 0.29 | neg | South | Mayamba | Mowato       | Swine | West Africa Duroc | Farm bush | stationary | Herd | 16.07.2017 | Mowoto        | F | 12 |
| SL 2017-842 |          |     | 0.30 | neg | South | Mayamba | Mowato       | Swine | West Africa Duroc | Farm bush | stationary | Herd | 16.07.2017 | Mowoto        | F | 12 |
| SL 2017-843 | Pool 88  | neg | 0.58 | pos | South | Mayamba | Mowato       | Swine | West Africa Duroc | Farm bush | stationary | Herd | 16.07.2017 | Mowoto        | M | 10 |
| SL 2017-844 |          |     | 0.25 | neg | South | Mayamba | Mowato       | Swine | West Africa Duroc | Farm bush | stationary | Herd | 16.07.2017 | Mowoto        | F | 3  |
| SL 2017-845 |          |     | 0.29 | neg | South | Mayamba | Mowato       | Swine | West Africa Duroc | Farm bush | stationary | Herd | 16.07.2017 | Mowoto        | M | 3  |
| SL 2017-846 |          |     | 0.33 | neg | South | Mayamba | Mowato       | Swine | West Africa Duroc | Farm bush | stationary | Herd | 16.07.2017 | Mowoto        | M | 3  |
| SL 2017-847 | Pool 89  | neg | 0.26 | neg | South | Mayamba | Mowato       | Swine | West Africa Duroc | Farm bush | stationary | Herd | 16.07.2017 | Mowoto        | F | 3  |
| SL 2017-848 |          |     | 0.36 | neg | South | Mayamba | Mowato       | Swine | West Africa Duroc | Farm bush | stationary | Herd | 16.07.2017 | Mowoto        | M | 3  |
| SL 2017-849 |          |     | 0.19 | neg | South | Mayamba | Mowato       | Swine | West Africa Duroc | Farm bush | stationary | Herd | 16.07.2017 | Mowoto        | F | 6  |
| SL 2017-850 |          |     | 0.19 | neg | South | Mayamba | Mowato       | Swine | West Africa Duroc | Farm bush | stationary | Herd | 16.07.2017 | Mowoto        | M | 3  |
| SL 2017-851 | Pool 90  | neg | 0.51 | neg | South | Mayamba | Mowato       | Swine | West Africa Duroc | Farm bush | stationary | Herd | 16.07.2017 | Mowoto        | M | 6  |
| SL 2017-852 |          |     | 0.30 | neg | South | Mayamba | Mowato       | Swine | West Africa Duroc | Farm bush | stationary | Herd | 16.07.2017 | Mowoto        | M | 12 |
| SL 2017-853 |          |     | 0.24 | neg | South | Mayamba | Mowato       | Swine | West Africa Duroc | Farm bush | stationary | Herd | 16.07.2017 | Mowoto        | F | 14 |
| SL 2017-854 |          |     | 0.35 | neg | South | Mayamba | Mowato       | Swine | West Africa Duroc | Farm bush | stationary | Herd | 16.07.2017 | Mowoto        | M | 6  |
| SL 2017-855 | Pool 91  | neg | 0.32 | neg | South | Mayamba | Mowato       | Swine | West Africa Duroc | Farm bush | stationary | Herd | 16.07.2017 | Mowoto        | M | 6  |
| SL 2017-856 |          |     | 0.22 | neg | South | Mayamba | Mowato       | Swine | West Africa Duroc | Farm bush | stationary | Herd | 16.07.2017 | Mowoto        | M | 6  |
| SL 2017-857 |          |     | 0.26 | neg | South | Mayamba | Mowato       | Swine | West Africa Duroc | Farm bush | stationary | Herd | 16.07.2017 | Mowoto        | M | 6  |
| SL 2017-858 |          |     | 0.21 | neg | South | Mayamba | Mowato       | Swine | West Africa Duroc | Farm bush | stationary | Herd | 16.07.2017 | Mowoto        | M | 6  |
| SL 2017-859 | Pool 92  | neg | 0.38 | neg | South | Mayamba | Mowato       | Swine | West Africa Duroc | Farm bush | stationary | Herd | 16.07.2017 | Mowoto        | F | 3  |
| SL 2017-860 |          |     | 0.29 | neg | South | Mayamba | Mowato       | Swine | West Africa Duroc | Farm bush | stationary | Herd | 16.07.2017 | Mowoto        | M | 3  |
| SL 2017-861 |          |     | 0.35 | neg | South | Mayamba | Mowato       | Swine | West Africa Duroc | Farm bush | stationary | Herd | 16.07.2017 | Mowoto        | M | 3  |
| SL 2017-862 |          |     | 0.29 | neg | South | Mayamba | Mowato       | Swine | West Africa Duroc | Farm bush | stationary | Herd | 16.07.2017 | Mowoto        | M | 3  |
| SL 2017-863 | Pool 93  | neg | 0.25 | neg | South | Mayamba | Mowato       | Swine | West Africa Duroc | Farm bush | stationary | Herd | 16.07.2017 | Mowoto        | M | 3  |
| SL 2017-864 |          |     | 0.24 | neg | South | Mayamba | Mowato       | Swine | West Africa Duroc | Farm bush | stationary | Herd | 16.07.2017 | Mowoto        | M | 3  |
| SL 2017-865 |          |     | 0.37 | neg | South | Mayamba | Mowato       | Swine | West Africa Duroc | Farm bush | stationary | Herd | 16.07.2017 | Mowoto        | F | 6  |
| SL 2017-866 |          |     | 0.27 | neg | South | Mayamba | Mowato       | Swine | West Africa Duroc | Farm bush | stationary | Herd | 16.07.2017 | Mowoto        | F | 6  |
| SL 2017-867 | Pool 94  | neg | 0.25 | neg | South | Mayamba | Mowato       | Swine | West Africa Duroc | Farm bush | stationary | Herd | 16.07.2017 | Mowoto        | F | 6  |
| SL 2017-868 |          |     | 0.37 | neg | South | Mayamba | Mowato       | Swine | West Africa Duroc | Farm bush | stationary | Herd | 16.07.2017 | Mowoto        | F | 6  |
| SL 2017-869 |          |     | 0.34 | neg | South | Mayamba | Mowato       | Swine | West Africa Duroc | Farm bush | stationary | Herd | 16.07.2017 | Mowoto        | F | 6  |
| SL 2017-870 |          |     | 0.42 | neg | South | Mayamba | Mowato       | Swine | West Africa Duroc | Farm bush | stationary | Herd | 16.07.2017 | Mowoto        | F | 3  |
| SL 2017-871 | Pool 95  | neg | 0.36 | neg | South | Mayamba | Mowato       | Swine | West Africa Duroc | Farm bush | stationary | Herd | 16.07.2017 | Mowoto        | F | 6  |
| SL 2017-872 |          |     | 0.73 | pos | South | Mayamba | Mowato       | Swine | West Africa Duroc | Farm bush | stationary | Herd | 16.07.2017 | Mowoto        | F | 6  |
| SL 2017-873 |          |     | 0.68 | pos | South | Mayamba | Mowato       | Swine | West Africa Duroc | Farm bush | stationary | Herd | 16.07.2017 | Mowoto        | F | 10 |
| SL 2017-874 |          |     | 0.45 | neg | South | Mayamba | Mowato       | Swine | West Africa Duroc | Farm bush | stationary | Herd | 16.07.2017 | Mowoto        | F | 12 |
| SL 2017-875 | Pool 96  | neg | 0.34 | neg | South | Mayamba | Mowato       | Swine | West Africa Duroc | Farm bush | stationary | Herd | 16.07.2017 | Mowoto        | F | 12 |
| SL 2017-876 |          |     | 0.54 | neg | South | Mayamba | Mowato       | Swine | West Africa Duroc | Farm bush | stationary | Herd | 16.07.2017 | Mowoto        | F | 6  |
| SL 2017-877 |          |     | 0.24 | neg | South | Mayamba | Mowato       | Swine | West Africa Duroc | Farm bush | stationary | Herd | 16.07.2017 | Mowoto        | M | 3  |
| SL 2017-878 |          |     | 0.44 | neg | South | Mayamba | Mowato       | Swine | West Africa Duroc | Farm bush | stationary | Herd | 16.07.2017 | Mowoto        | F | 3  |
| SL 2017-879 | Pool 97  | neg | 0.24 | neg | South | Mayamba | Mowato       | Swine | West Africa Duroc | Farm bush | stationary | Herd | 16.07.2017 | Mowoto        | F | 12 |
| SL 2017-880 |          |     | 0.27 | neg | South | Mayamba | Mowato       | Swine | West Africa Duroc | Farm bush | stationary | Herd | 16.07.2017 | Mowoto        | F | 6  |
| SL 2017-881 |          |     | 1.01 | pos | South | Mayamba | Mowato       | Swine | West Africa Duroc | Farm bush | stationary | Herd | 16.07.2017 | Mowoto        | M | 6  |
| SL 2017-882 |          |     | 0.49 | neg | South | Mayamba | Mowato       | Swine | West Africa Duroc | Farm bush | stationary | Herd | 16.07.2017 | Mowoto        | M | 6  |
| SL 2017-883 | Pool 98  | neg | 0.55 | neg | South | Mayamba | Mowato       | Swine | West Africa Duroc | Farm bush | stationary | Herd | 16.07.2017 | Mowoto        | F | 18 |
| SL 2017-884 |          |     | 0.42 | neg | South | Mayamba | Mowato       | Swine | West Africa Duroc | Farm bush | stationary | Herd | 16.07.2017 | Mowoto        | F | 12 |
| SL 2017-885 |          |     | 0.59 | neg | South | Mayamba | Mowato       | Swine | West Africa Duroc | Farm bush | stationary | Herd | 16.07.2017 | Mowoto        | F | 12 |
| SL 2017-886 |          |     | 1.14 | pos | South | Mayamba | Mowato       | Swine | West Africa Duroc | Farm bush | stationary | Herd | 16.07.2017 | Mowoto        | F | 12 |
| SL 2017-887 | Pool 99  | neg | 1.07 | pos | South | Mayamba | Mowato       | Swine | West Africa Duroc | Farm bush | stationary | Herd | 16.07.2017 | Mowoto        | F | 12 |
| SL 2017-888 |          |     | 0.78 | pos | South | Mayamba | Kawela       | Swine | West Africa Duroc | Farm bush | stationary | Herd | 28.07.2017 | Foya          | M | 12 |
| SL 2017-889 |          |     | 0.68 | pos | South | Mayamba | Kawela       | Swine | West Africa Duroc | Farm bush | stationary | Herd | 28.07.2017 | Foya          | F | 36 |
| SL 2017-890 |          |     | 0.68 | pos | South | Mayamba | Kawela       | Swine | West Africa Duroc | Farm bush | stationary | Herd | 28.07.2017 | Foya          | F | 6  |
| SL 2017-891 | Pool 100 | neg | 0.31 | neg | South | Mayamba | Kawela       | Swine | West Africa Duroc | Farm bush | stationary | Herd | 28.07.2017 | Foya          | F | 6  |
| SL 2017-892 |          |     | 0.35 | neg | South | Mayamba | Kawela       | Swine | West Africa Duroc | Farm bush | stationary | Herd | 28.07.2017 | Foya          | F | 6  |
| SL 2017-893 |          |     | 0.47 | neg | South | Mayamba | Kawela       | Swine | West Africa Duroc | Farm bush | stationary | Herd | 28.07.2017 | Foya          | M | 7  |
| SL 2017-894 |          |     | 1.56 | pos | South | Mayamba | Kawela       | Swine | West Africa Duroc | Farm bush | stationary | Herd | 28.07.2017 | Foya          | F | 6  |
| SL 2017-895 | Pool 101 | neg | 0.74 | pos | South | Mayamba | Momenga      | Swine | West Africa Duroc | Farm bush | stationary | Herd | 28.07.2017 | Momenga       | F | 60 |
| SL 2017-896 |          |     | 1.60 | pos | South | Mayamba | Momenga      | Swine | West Africa Duroc | Farm bush | stationary | Herd | 09.09.2017 | Momenga       | F | 48 |
| SL 2017-897 |          |     | 0.89 | pos | South | Mayamba | Momenga      | Swine | West Africa Duroc | Farm bush | stationary | Herd | 09.09.2017 | Momenga       | F | 48 |
| SL 2017-898 |          |     | 0.97 | pos | South | Mayamba | Momenga      | Swine | West Africa Duroc | Farm bush | stationary | Herd | 09.09.2017 | Momenga       | M | 48 |
| SL 2017-899 | Pool 102 | neg | 0.98 | pos | South | Mayamba | Momenga      | Swine | West Africa Duroc | Farm bush | stationary | Herd | 09.09.2017 | Momenga       | F | 36 |
| SL 2017-900 |          |     | 3.07 | pos | South | Mayamba | Momenga      | Swine | West Africa Duroc | Farm bush | stationary | Herd | 09.09.2017 | Momenga       | F | 36 |

Supplemental Table S2 HEV ELISA Validation

| Sample number | pretested finding/result | OD (p239) | relative OD (6A2) | Sample number | pretested finding/result | OD (p239) | relative OD (6A2) | Sample number         | pretested finding/result | OD (p239) | relative OD (6A2) |
|---------------|--------------------------|-----------|-------------------|---------------|--------------------------|-----------|-------------------|-----------------------|--------------------------|-----------|-------------------|
| 1             | neg                      | 0,14      | 13,41             | 89            | positiv                  | 1,81      | 177,78            | 166                   | neg                      | 0,11      | 8,85              |
| 2             | neg                      | 0,09      | 8,57              | 90            | positiv                  | 3,61      | 353,46            | 167                   | neg                      | 0,12      | 9,64              |
| 3             | neg                      | 0,11      | 10,57             | 91            | positiv                  | 3,07      | 300,86            | 168                   | neg                      | 0,09      | 7,18              |
| 4             | neg                      | 0,14      | 13,11             | 92            | positiv                  | 3,58      | 351,06            | 169                   | neg                      | 0,09      | 7,00              |
| 5             | neg                      | 0,09      | 8,78              | 93            | positiv                  | 3,65      | 357,53            | 170                   | neg                      | 0,08      | 6,64              |
| 6             | neg                      | 0,08      | 8,19              | 94            | positiv                  | 2,93      | 287,58            | 171                   | neg                      | 0,10      | 7,77              |
| 7             | neg                      | 0,09      | 8,27              | 95            | positiv                  | 3,36      | 329,42            | 172                   | neg                      | 0,10      | 7,88              |
| 8             | neg                      | 0,10      | 9,82              | 96            | positiv                  | 2,45      | 240,20            | 173                   | neg                      | 0,09      | 7,50              |
| 9             | neg                      | 0,13      | 12,84             | 97            | positiv                  | 0,37      | 36,46             | 174                   | neg                      | 0,10      | 8,41              |
| 10            | neg                      | 0,11      | 11,13             | 98            | positiv                  | 3,61      | 353,60            | 175                   | neg                      | 0,09      | 7,19              |
| 11            | borderline               | 0,38      | 36,49             | 99            | neg                      | 0,10      | 9,57              | 176                   | neg                      | 0,08      | 6,73              |
| 12            | neg                      | 0,11      | 10,51             | 100           | positiv                  | 3,56      | 348,91            | 177                   | neg                      | 0,10      | 7,85              |
| 13            | neg                      | 0,11      | 10,33             | 101           | positiv                  | 3,48      | 341,34            | 178                   | neg                      | 0,09      | 7,65              |
| 14            | neg                      | 0,08      | 7,29              | 102           | positiv                  | 3,50      | 342,80            | 179                   | neg                      | 0,09      | 6,95              |
| 15            | neg                      | 0,14      | 13,38             | 103           | positiv                  | 3,34      | 327,81            | 180                   | neg                      | 0,09      | 7,07              |
| 16            | neg                      | 0,11      | 10,73             | 104           | positiv                  | 3,55      | 348,25            | 181                   | neg                      | 0,09      | 7,65              |
| 17            | neg                      | 0,09      | 9,14              | 105           | positiv                  | 3,72      | 364,76            | 182                   | neg                      | 0,20      | 16,07             |
| 18            | neg                      | 0,13      | 12,63             | 106           | neg                      | 0,17      | 16,64             | 183                   | neg                      | 0,09      | 7,10              |
| 19            | neg                      | 0,10      | 9,87              | 107           | neg                      | 0,31      | 30,22             | 184                   | neg                      | 0,08      | 6,73              |
| 20            | neg                      | 0,23      | 22,10             | 108           | positiv                  | 1,02      | 99,98             | 185                   | neg                      | 0,10      | 7,82              |
| 21            | neg                      | 0,10      | 9,85              | 109           | neg                      | 0,12      | 11,47             | 186                   | neg                      | 0,08      | 6,65              |
| 22            | pos                      | 1,49      | 144,85            | 110           | positiv                  | 3,30      | 323,94            | 187                   | neg                      | 0,10      | 8,06              |
| 23            | neg                      | 0,11      | 10,72             | 111           | positiv                  | 1,38      | 134,97            | 188                   | neg                      | 0,09      | 6,96              |
| 24            | neg                      | 0,33      | 32,00             | 112           | positiv                  | 3,01      | 294,83            | 189                   | neg                      | 0,09      | 7,40              |
| 25            | neg                      | 0,09      | 9,04              | 113           | positiv                  | 2,73      | 267,78            | 190                   | neg                      | 0,11      | 8,56              |
| 26            | neg                      | 0,15      | 14,83             | 114           | neg                      | 0,60      | 58,80             | 191                   | neg                      | 0,08      | 6,59              |
| 27            | pos                      | 2,63      | 255,56            | 115           | neg                      | 0,09      | 8,74              | 192                   | neg                      | 0,08      | 6,43              |
| 28            | neg                      | 0,10      | 9,99              | 116           | neg                      | 0,09      | 8,56              | 193                   | neg                      | 0,09      | 6,90              |
| 29            | neg                      | 2,74      | 266,00            | 117           | neg                      | 0,08      | 7,75              | 194                   | neg                      | 0,08      | 6,52              |
| 30            | neg                      | 0,10      | 9,98              | 118           | neg                      | 0,09      | 8,33              | 195                   | neg                      | 0,08      | 6,50              |
| 31            | pos                      | 0,56      | 54,62             | 119           | neg                      | 0,08      | 7,55              | 196                   | neg                      | 0,09      | 7,23              |
| 32            | neg                      | 0,08      | 8,09              | 120           | neg                      | 0,09      | 8,88              | 197                   | neg                      | 0,17      | 13,54             |
| 33            | neg                      | 0,10      | 9,47              | 121           | neg                      | 0,10      | 10,25             | 198                   | neg                      | 0,17      | 13,64             |
| 34            | positiv                  | 2,98      | 288,95            | 122           | neg                      | 0,08      | 7,93              | 199                   | neg                      | 0,15      | 12,23             |
| 35            | neg                      | 0,08      | 7,79              | 123           | neg                      | 0,09      | 8,51              | 200                   | neg                      | 0,12      | 9,52              |
| 36            | neg                      | 0,75      | 73,00             | 124           | neg                      | 0,09      | 8,40              | 201                   | neg                      | 0,15      | 12,35             |
| 37            | neg                      | 0,08      | 8,13              | 125           | neg                      | 0,08      | 7,85              | pos control (mAB 6A2) |                          | 1,24      |                   |
| 38            | neg                      | 0,09      | 9,06              | 126           | neg                      | 0,08      | 7,66              | negative control      |                          | 0,12      |                   |



|    |          |      |        |                       |         |      |        |
|----|----------|------|--------|-----------------------|---------|------|--------|
| 39 | neg      | 0,09 | 8,55   | 127                   | neg     | 0,08 | 7,88   |
| 40 | neg      | 0,19 | 18,32  | 128                   | neg     | 0,10 | 9,76   |
| 41 | neg      | 0,09 | 8,96   | 129                   | neg     | 0,09 | 8,87   |
| 42 | neg      | 0,08 | 8,04   | 130                   | neg     | 0,08 | 7,99   |
| 43 | positiv  | 1,85 | 179,25 | 131                   | neg     | 0,08 | 7,98   |
| 44 | positiv  | 2,32 | 224,96 | 132                   | neg     | 0,08 | 7,98   |
| 45 | positiv  | 2,88 | 279,55 | 133                   | neg     | 0,09 | 8,91   |
| 46 | positiv  | 0,23 | 22,57  | 134                   | neg     | 0,09 | 9,03   |
| 47 | positiv  | 2,39 | 231,76 | 135                   | neg     | 0,09 | 8,83   |
| 48 | fraglich | 0,25 | 24,28  | 136                   | neg     | 0,29 | 28,64  |
| 49 | neg      | 0,09 | 8,35   | 137                   | neg     | 0,12 | 11,55  |
| 50 | neg      | 0,09 | 8,69   | 138                   | positiv | 1,72 | 168,59 |
| 51 | positiv  | 2,93 | 284,60 | 139                   | neg     | 0,09 | 8,94   |
| 52 | positiv  | 3,01 | 291,93 | 140                   | positiv | 0,42 | 41,23  |
| 53 | positiv  | 3,15 | 305,46 | 141                   | neg     | 0,08 | 8,19   |
| 54 | positiv  | 3,09 | 300,31 | 142                   | positiv | 2,78 | 272,48 |
| 55 | positiv  | 1,71 | 166,34 | 143                   | neg     | 0,07 | 7,25   |
| 56 | positiv  | 2,36 | 229,05 | 144                   | neg     | 0,09 | 8,68   |
| 57 | positiv  | 2,86 | 277,57 | 145                   | neg     | 0,10 | 9,75   |
| 58 | positiv  | 3,08 | 299,19 | 146                   | neg     | 0,08 | 8,32   |
| 59 | positiv  | 2,91 | 282,88 | 147                   | positiv | 1,18 | 115,77 |
| 60 | positiv  | 1,50 | 145,96 | 148                   | neg     | 0,09 | 8,78   |
| 61 | positiv  | 2,71 | 263,31 | 149                   | neg     | 0,08 | 7,95   |
| 62 | positiv  | 2,84 | 275,40 | 150                   | positiv | 0,53 | 51,92  |
| 63 | positiv  | 1,72 | 167,44 | 151                   | positiv | 0,68 | 66,20  |
| 64 | neg      | 0,26 | 24,88  | 152                   | neg     | 0,14 | 13,85  |
| 65 | neg      | 0,15 | 14,39  | 153                   | neg     | 0,09 | 9,15   |
| 66 | positiv  | 2,33 | 225,76 | 154                   | positiv | 0,54 | 52,78  |
| 67 | positiv  | 3,07 | 297,99 | 155                   | neg     | 0,23 | 22,69  |
| 68 | positiv  | 2,55 | 247,49 | 156                   | neg     | 0,09 | 9,31   |
| 69 | positiv  | 3,27 | 317,88 | 157                   | neg     | 0,11 | 11,06  |
| 70 | positiv  | 2,84 | 275,53 | 158                   | positiv | 0,46 | 45,05  |
| 71 | positiv  | 3,12 | 303,30 | 159                   | neg     | 0,51 | 49,97  |
| 72 | positiv  | 3,01 | 292,41 | 160                   | neg     | 0,14 | 13,50  |
| 73 | positiv  | 3,10 | 300,56 | 161                   | neg     | 0,33 | 32,79  |
| 74 | positiv  | 1,15 | 112,10 | 162                   | neg     | 0,13 | 13,13  |
| 75 | positiv  | 3,19 | 310,04 | 163                   | neg     | 0,10 | 9,41   |
| 76 | positiv  | 3,08 | 298,99 | 164                   | neg     | 0,22 | 21,71  |
| 77 | positiv  | 0,08 | 7,65   | 165                   | neg     | 0,08 | 7,86   |
| 78 | positiv  | 3,13 | 303,63 | pos control (mAb 6A2) |         | 1,06 |        |
| 79 | positiv  | 1,95 | 189,71 | negative control      |         | 0,09 |        |
| 80 | positiv  | 2,88 | 279,71 |                       |         |      |        |
| 81 | positiv  | 3,24 | 314,34 |                       |         |      |        |
| 82 | positiv  | 3,00 | 291,52 |                       |         |      |        |

|                       |         |      |        |
|-----------------------|---------|------|--------|
| 83                    | positiv | 3,30 | 320,56 |
| 84                    | positiv | 3,13 | 304,22 |
| 85                    | positiv | 3,28 | 318,68 |
| 86                    | positiv | 3,24 | 314,21 |
| 87                    | positiv | 3,21 | 311,20 |
| 88                    | positiv | 3,09 | 300,11 |
| pos control (mab 6A2) |         | 1,03 |        |
| negative control      |         | 0,09 |        |

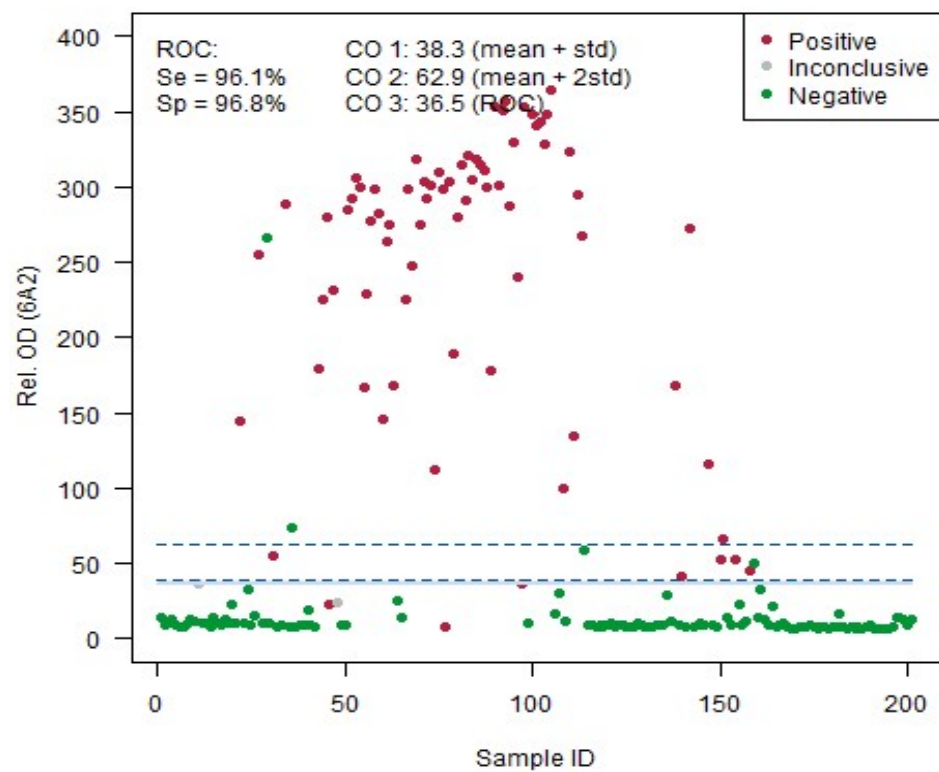

Supplement: s1 [file s1]
